# Supplementary material for: Pathogenic NLRP3 mutants form constitutively active inflammasomes resulting in immune-metabolic limitation of IL-1β production
Source: Nat Commun. 2024 Feb 6;15:1096. doi: 10.1038/s41467-024-44990-0 (PMC10847128; doi:10.1038/s41467-024-44990-0)
Supplement: Supplementary file 4 — Supplementary Data 1 [file 41467_2024_44990_MOESM4_ESM.xlsx]

## Sheet: final_paper
Supplementary Data 1. Compounds detected in metabolomic analysis.
Compound	HD untreated	HD untreated	HD untreated	HD untreated	HD LPS	HD LPS	HD LPS	HD LPS	CAPS untreated	CAPS untreated	CAPS untreated	CAPS untreated	CAPS LPS	CAPS LPS	CAPS LPS	CAPS LPS	Mass	Retention Time	Polarity
1		598112		621351		548848		405827	415141		451513	481118	383609			483473	100.933	14.264	Neg
2	1089020	1705932	1922730	1770028	1650223	1499209	1043110	1141502	1100778	1417824	1177287	1422042	1481226	1500061	1396533	1611913	136.978	22.636	Neg
3	255192	278191	260599														139.918	14.034	Neg
4	1152629	1208253	992938	1204069	848319	1217759	1528610	1132011	1059646	1066276	1086925	1149928	795022		1101151	844014	147.973	22.586	Neg
5	269488	286612	267973	281761	291168	254917	261672	246929	245968	255409	227316	247512	206855	235784	227915	241272	166.026	6.425	Neg
6	281953	276402	266452	260771	258699	235455	245933	244574	259403	252651	241312	276042	263879	287627	261901	279939	167.939	22.087	Neg
7		180409		201891	164146											182746	172.11	9.316	Neg
8		262494	290304	190807	268508	242709	236412		250184	234675	227431	243842	238652	236227	247154	245869	172.954	22.291	Neg
9	161791	185081	190251	190266	178520	180574	197028	180765	181212	191445	175021	168452	164904	169477	200694	160015	180.082	8.186	Neg
10	3499315	2736539	2776535	2715379	2750848	3051773	1834149	2493987	864735	2316326	2305824	2256198	2215974	2026493	2157057	3241241	184.942	14.283	Neg
11	255544	239368	234740	239465	223659	224800	224702	207683	196182	201667	180059	184731	187969	265076	207271	209055	184.942	22.006	Neg
12	204906	189199	197108	189638	177998	157738	170281	176777	166116	154840	167563	155205	163858	149798	157220	170154	188.105	8.455	Neg
13	7045694	6941074	7049123	7049576	6803474	6818471	6409811	5948368	5931330	6000283	5897986	5997611	5583604	5848936	6341910	6118248	195.09	12.935	Neg
14	375021	328398	388869	359871	331654	340179	331535	335394	304429	345292	301394	314744	306637	293195	307183	300962	196.147	12.807	Neg
15	204991	230280	227246	193318	190855	224587	180099	165519	190735	174797	198316	174709	177554	171351	169556	172723	197.033	9.342	Neg
16	678501	705435	2923702	1585212	1621190	926516	1584179	1320591	1583177	1464380	1605730	2798402	1530368	720801	1091840	1439497	198.971	22.67	Neg
17	215506						178207		152722				159880	153295			201.866	22.006	Neg
18											90741						208.11	12.751	Neg
19				173507	110802						88779	169359					210.162	12.167	Neg
20	430040	460851	515143	560671	546014	548190	573989	610200	584436	590466	576980	582643	555922	572954	540896	510084	222.162	13.644	Neg
21	273365	267972	289259	259824	284517	288206	300194	301186	245321	302721	255222	283498	296942	297761	270491	269635	222.162	12.438	Neg
22	160010	174576	159077	162476	168402	143476	151787	143866		153562	20834	126576		73733	145160	82281	232.941	21.62	Neg
23	186912	170910	168785	170057				181375	183578			179371	184845		180332		234.162	13.633	Neg
24	302130	289454	240935	263947	308054	302015	264971	261948	271749	304050	247689	291627	263865	256459	240557	270439	237.113	12.437	Neg
25	646804	695975	654532	686570	670612	667503	580294	646636	641854	674348	646500	672793	655842	652218	619619	605003	240.075	13.568	Neg
26	226061	224751	253711	260401	240543	225423	231364	225466	242005	268269	241552	219732	218380	211887	216563	221613	240.137	12.818	Neg
27				145142			125595		144040			159862					240.137	13.678	Neg
28	682968	667817	694716	703318	675859	680199	674852	690773	595632	674868	553240	397483	664326	592224	605891	616056	249.968	21.671	Neg
29	664680	700871	735808	772401	810041	811875	812112	815813	823454	850235	872976	857677	819668	889624	764119	811865	251.153	13.994	Neg
30	203781	233520	255585	254281	253395	259934	265856	262345	243925	257174	257591	242340	246776	237612	258936	247593	259.06	12.791	Neg
31	6744997	6857286	6798964	7401206	6717376	6793247	6944828	6944442	6878553	7190319	7212249	6517074	4610177	7059036	7193491	7270139	266.156	15.117	Neg
32	363383	378506	416381	403015	426902	435078	543323	533032	565174	669861	664360	671346	720671	772431	662005	871271	278.152	13.919	Neg
33	260258	275533	282259	262262	272331	294093	279418	185111	280175	280523	274670	274873	261183	253655	202531	262546	278.152	13.486	Neg
34	657765	586459	532728	707502	676836	671261	536297	653251	625675	657877	655456	631622	638539	649102	630600	593494	294.183	12.446	Neg
35				173504		154828	150929	202062	163633	176428	145431	144125	139801	180393		211928	294.184	12.888	Neg
36					264504			358030		299410							299.951	10.757	Neg
37	133149	130961	128630	167193	166910	126601	143054	119141	145274	165776	147650	124383	137933	144531	169544	142246	300.103	14.132	Neg
38	284971	289558	287923	283928	277942	315456	289140	257420	241622	260080	257924	256473	273419	248183	253215	239607	302.079	9.808	Neg
39	233387	206124	226648	212169	235913	194533	231653	241088	209932	230683	212432	177434	181721	195910	217697	176591	305.975	12.403	Neg
40	207034	188281	197314	220540	192089	209958	219490		189495	197422		228495	208989	234748	236233		306.149	15.001	Neg
41	135419	117849	113437	142366	110512							108175					308.123	12.804	Neg
42	396208	424997	477771	454682	374388	519748	332857	414051	361780	407465	361244	402821		371734	323586	357153	310.182	16.377	Neg
43	173959	168684	151657	157584	147877	164366	185315	193683	173133	162698	187614	183982	178601	210980	145420	167657	312.209	14.017	Neg
44								304803									313.844	14.301	Neg
45	874916	865544	798643	752922	838516	785252	849965	813862	652043	845047	673708	777591	782622	722047	769238	694003	317.955	21.671	Neg
46	1070732	1047960	1056217	1068093	1018364	1028934	979954	954715	928096	959670	946096	971174	885780	950884	872003	963590	328.134	14.849	Neg
47	222333	229898	313910	238023	219633	221293	220235	210415	203183	215776	219098	213237	212869	192964		214933	329.911	22.039	Neg
48							124647				174917	131600	146383	201991	177418	144993	330.241	11.792	Neg
49						99612		108386	120128	133805	147474	106876	124362	154029	147898	150813	330.241	12.404	Neg
50		427679	459363	490519	434808	442236	432660	467510		464867	447916	478405		481289	492123	489185	334.142	15.129	Neg
51		415405	385176	464912	435627	438259	442496	463608	481928	465517	455787	485003	369382	475326	479989	483553	334.143	15.164	Neg
52	231080	212882	226761	226376	208621	225629	210334	194359	185299		195465	191846	198518	189928	219210	194918	340.134	14.68	Neg
53	201742	202267	202149	203498	210258	208051	205715	204464	200971	205363	209102	206941	213736	205203	185953	189621	341.867	22.055	Neg
54	1241541	1298710	1312028	1379461	1322652	1262515	1331088	1314568	1297175	1290457	1247531	1222666	1248554	1331907	1214454	1250982	342.149	15.184	Neg
55	149701	151645	166792	167787	147865	162802	152733	145131	148010	154240	153283	148050	150174	154757	144206	148228	343.864	22.049	Neg
56					97591	91528	92385	120243	125675	129540	152904	155360	136643	139892	174888	183298	346.139	13.867	Neg
57								160451									347.185	16.564	Neg
58	2998722	2805131	2997025	2968989	2915145	2902233	2977740	2867733	2803995	2804279	2762750	2658517	2741017	2787282	2731098	2754923	354.15	14.95	Neg
59			185363		217707	201227		209486	193891		200891			85785	181880		354.169	15.687	Neg
60	143529			171631	230340		179921			207079	180396	182401		189352	212588	172995	354.219	14.026	Neg
61	3436451	2991409	3585573	3894080	3796390	3741981	3754267	3984210	3772425	3833509	3456601	1193970	1597359	1666746	3366367	3405717	356.165	15.674	Neg
62	137987		138303	138623	131810		144389	145662	135017	141218	140815	144509			142535	146305	361.95	14.185	Neg
63	279876	267769	304551	272475	297699	294625	280890	282575	288327	325036	326826	306320	295039	306282	253580	269167	362.171	12.437	Neg
64		135831		143674	132841			124363		115778			136758				368.271	14.89	Neg
65	181139	174308	174178	171466	171021	156006	184141	159077	113287	162963		131671	122524	111924	156985	115157	368.915	21.635	Neg
66	338481	89778	1572751	183274	163819	209657	70847	247416	468399	154592	16388	81852	40983	1305268	82998	265095	369.984	21.556	Neg
67	512939	257813	579625	321816	590267	446680	550006	227257	286482	412937	376362	390608	457166	448391	379687	493449	369.984	12.355	Neg
68	619614	582515	636175	552972	548500	555698	381364	534029	531082	552804	467203	322281	406021	480577	510314	484154	370.181	16.275	Neg
69	582705	575409	610828	602607			381508			552474							370.181	16.265	Neg
70											123854			140942	148270	154254	375.168	13.178	Neg
71	235897	229996	236591	309065	230847	204864	207342	204162	229060	193563	187802	191979	172757	226252	214321	218456	376.111	12.814	Neg
72	1079410	1035071	1242062	1226904	1170904	1179321	1217361	1238885	1245368	1220092	1248348	1076568	1199131	1221178	1085103	1136657	380.166	15.044	Neg
73	2432859	2495581	2529493	2407374	2471788	2470541	2388261	2512417	2432268	2386671	2408706	866219	1862917	1687007	2424175	2315436	382.181	15.812	Neg
74	1535819	1345761	1354843	1011985	1465530	1326325	1410733	1272532	1432509	1657705	1326913	1033376	1280136	900100	1287110	1139868	384.196	17.081	Neg
75	1087432	896448	966529	1051259	859888	909923	875987	791955	788379	1009853	980215	1004359	904246	1164285	851680	775156	384.197	14.775	Neg
76	744615	694798	767234	775550	704907	759122	652576	665756	862473	754045	630616	873853	857525	648542	626566	631926	385.943	21.671	Neg
77	463706	292685	356537	301306	309687	269357	355545	319932	298626	406742	565793	398071	333353	270141	280729	241309	386.186	12.745	Neg
78				99781													388.294	11.889	Neg
79	147209	145837	170468	166703	164195	165946	157498	170008	157457	156265	160326	162444	147819	173655	159390	147281	393.194	14.752	Neg
80			149627					136961		125972	201185						395.303	12.803	Neg
81	231522	228645	236767	236625	254585	274034	278158	255314	250384	277040	283874	275929	290476	292918	261473	264135	395.912	14.202	Neg
82	427720	437343	436004	439864	419457	413189	425701	389903	421043	409214	409520	402564	403884	445717	374949	431090	397.898	22.003	Neg
83	177894		183454	205365	246638	217912	204677	196156		240236	219764	245167	238857	222916	214141	224607	397.908	14.215	Neg
84	269434	243585	274451	244144	248179	273599	260489	248146	252064	268642	272726	263511	259285	267603	225999	239729	399.241	14.977	Neg
85	411185	459883	445853	449163	375969	433392	417104	386124	402340	424454	420855	411613	457132	413714	450572	470934	409.927	14.335	Neg
86	524086	516971			482585				473554		452066	466791	466549	487304			411.923	14.326	Neg
87			249679	264500	203764				257329						239384		413.919	14.339	Neg
88	683299	694560	734356	674844	718172	738742	724007	654315	754451	763467	693124	740818	744016	710479	686823	751465	423.943	14.438	Neg
89	710939			703466	756900		650039	905280		622761	688636	764312	690231		718297		425.939	14.45	Neg
90		364406		411993							438808	347782		315486	342786		427.934	14.465	Neg
91	161622	189567	199615	162330	202195	186638	152523	196998	188678	185817	156205	203510	189748	170452	195994	172308	430.158	12.446	Neg
92	325579		335513					320814			313131	281619		301186			430.166	14.665	Neg
93	333718	323764	331263	367787	341894	344350	372658	338764	317726	317323	321101	354531	352989	336975	356687	337343	435.962	14.548	Neg
94	855065	747301	838446	806852	796721	838385	736177	722806	795545	777006	823274	831292	820868	843767	763712	823992	437.959	14.542	Neg
95	809254	848165	877094	866889	837307	818579	812402	772033	797728	849128	831025	778680	757132	839734	815813	801357	439.952	14.548	Neg
96					490231	467493	424196		535840	429835	519848			518274	444764		441.949	14.554	Neg
97	369694	339885	349919	360974	358491	359196	360782	363129	338454	369712	341699	119278	206784	131656	340077	321749	442.21	15.763	Neg
98	278205	312220	318021	301322	287882	307294	286830	277171	269798	258853	265295	262332	291166	273434	333449	275238	443.889	14.397	Neg
99	322170	377950	368873	313067	339491	351530	356256	345865	354023	460711	426930	387314	342068	349259	340960	322256	445.885	14.414	Neg
100	852308	873652	866822	833286	788982	841753	656630	778423	689854	673934	755551	763157	780762	756527	740481	625521	451.974	14.661	Neg
101	393404	402065	350835	387613	379575	377565	381365	362631	376210	368075	352770	355721	327617	367352	373442	361186	452.336	7.112	Neg
102	991451	999340	1024837	1065929	1007989	1000232	1026689	966889	953295	1019571	797039	1105012	1115329	1039631	909598	675870	453.93	21.671	Neg
103	919854	928862	970915	924833		882431	676334	916519	924101	1003412	796992		748183	864297	813774	815067	453.969	14.681	Neg
104	264260	262868	313180	259851	299625	307346	291284	230782	247389	285861	271957	278077	291596	247568	276159	271227	455.908	14.48	Neg
105	504014	661497	542635	493312	567576	494889	516673	535800	655688	513068	558150		522953	525824	503686	522233	455.961	14.664	Neg
106	718975	733918	971805	1063790	998810	1071539	760278	1076037	822211	760873	1142764	778954	1104299	1173629	746248	786066	457.244	22.053	Neg
107	1064037	741194	552264	649928	515164	513500	761576	692733	669153	742470	677485	663638	683543	678425	685246	657648	457.244	13.81	Neg
108	729765	731334	702751	752358	774448	689572	717128	674526	690487	678815	664522	626249	656863	706724	704105	699132	457.905	14.476	Neg
109	906472	887999	825321	926494	885982		870986	838978	854435	914648	824451	855245	831826	946752	801709	786518	459.901	14.482	Neg
110	177002	206428		184118	211878	228005	195514	199296	234889	196591	191717	191618			192894		461.9	14.501	Neg
111															289675		463.892	14.625	Neg
112	178294	182054										171994	167607	164320			465.886	21.986	Neg
113	796529	1051396	821527	812827	781497	926594	697847	730759	1010369	692913	914111	942933	721424	896639	878065	749197	465.99	14.816	Neg
114	613043		847792	1041489	814653	939821	1045862	1080077	1090100	1040059	1050682	1335166	887543	872018	1084750	1093238	467.985	14.815	Neg
115	408695	345616	323168	267925	442845	292105	342395	346753	331099	308696	401277	264348	343752	331089	316453	314925	469.922	14.617	Neg
116	556540	521993	532898		512519		355630						488863		547985		469.975	14.8	Neg
117		1098993		979800	1010956	1239499	1107782	1005652	1111073	973489	1044689	1046951	1035216	1043933		1097044	471.92	14.568	Neg
118	1396481	1330816	1373364	1287910	1321437	1289731	1294208	1279284	1367545	1328859	1331625	1294829	1241367	1266862	1342002	1256100	473.916	14.583	Neg
119								851960									474.29	17.828	Neg
120	716415	910978	738863	794070	652014	871163	890410		411203	734816	786007		683425	774489	958719	564323	475.911	14.592	Neg
121	142174	140722	146242	143456		148445	138116		148060	139592	137995	140896	144207	142779			477.842	22.053	Neg
122	1446377	1768912	1458371	1639404	1633310	1609673	1275691	1479736	1496285	1569694	1526897	1616176	2312608	1515037	1527703	1493931	487.934	14.671	Neg
123	174147	151827	172969	171027	156586	170298	156286	165195	170239	155238	157956	148556	156735	154865	155735	150060	488.313	7.112	Neg
124			1216741	1134387	1184549	917513	1232541	859745		1224585	1487987		1243900	1178773	1149101		489.928	14.671	Neg
125															115720		492.274	12.974	Neg
126		373176		449322	503995		445301	446606	456001	396758	330732	452803	415667	346723	382972	427101	493.864	14.575	Neg
127	419493	390613	367573	422190	334291	407972	393150	373558	404700	342451	399150	367900	335104	379850	365266	379900	495.983	14.643	Neg
128	624357	412117	499346	407034	421156	366327	481381	433303	433891	550496	772974	567399	465036	399164	365744	406132	500.179	12.738	Neg
129	1339698	2054298	2058188	1676781	2217333	2360053	2422065	2052644	2156507	2279657	1750484	1371609	2387556	1853953	1350848	2008398	501.951	14.791	Neg
130	1457715	1582435	558497	1592101	1286788	1110964	903550	891658	1639602	1536884	1546031	1104304	1426383	1234851	1099572	1078711	503.943	14.8	Neg
131											587929						505.879	14.709	Neg
132		753113		1684158				776458		763794			865473	775669			507.883	14.651	Neg
133	273130	277194	386549	238965	305112	293902	280060	262327	232528	288774	282464	288505	259804	274092	303751	282682	509.998	14.782	Neg
134	44486								27666								513.888	21.623	Neg
135	221831	204673	241271	203552	224219	234080	202258	198313	218139	205982	223143	229335	201909	225870	219763	214923	515.332	7.112	Neg
136	1093912	1196717	2117373	943264	1415819	1629281	1373979	1198454	1540237	1117828	1118188	1099461	1368758	942372	1218575	1201848	517.959	14.934	Neg
137								135460			172431	165219	169204	189376	180788	185346	519.244	22.087	Neg
138	1109926	1211166	1133512	1147079	1371445	1223075	1004623	1054887	984122	1232740	1202101	1312244	1233939	1122273	1073211	1309025	521.918	21.671	Neg
139	1289003		103111	7386	1332967	1082020	1283463	1277554	1225900	1204792	1023918	961554	1445060	1380409	1284915	1131611	523.892	14.744	Neg
140	232575	311536	258918	312169	310438	274068	285864					369992	324842	267803	238290		524.014	14.962	Neg
141	782642	781680	820492	568222	645759	771095	653669	550679	750389	578140	746698	607328	661160	863213	690324	549796	526.011	14.963	Neg
142	597083	620210	549204	674343	682731	697541	631084	636459	730135	739075	776419	886424	782411	851440	673042	635291	528.006	14.967	Neg
143	451074	490207	559749	425752	780262	388927	416999	425924	398902	459382	448537	401225	426358	431421	441899	355690	529.945	14.649	Neg
144			401437		362574	264146							244157				530	14.963	Neg
145	471959	504592	472263	493261	484842	480063	507215	373095	437094	524565	516674	466540	500377	479993	472219	460583	540.027	15.132	Neg
146	478978	425606	562211	480580	522424	445490	406682				532695	446287	386726	400532	455909	394643	542.023	15.125	Neg
147	487484	497442	461682	627933	488860	623838	495268	459714	545639	246879	439944	740060	589960	500573	532084	473032	543.96	14.78	Neg
148	177802	177012	188273	168575	178961	182940	186303	179913	174995	174814	180938	183636	185507	181508	166833	176980	545.831	22.055	Neg
149	1445582	1329880	1574774	1631089	1514843	1292718	1380908	1178209	1431665	1215850	1360975	1172143	1608665	1434256	1561417	1133861	545.957	14.8	Neg
150		145910															549.949	12.356	Neg
151	383148	363290	391862	411260	389875	391695	388189	767039	465022	357849	364826	695915	523066	620998	367038	356949	551.887	14.617	Neg
152	281669			496492	338978	551868	506932	438304	424105	467824	460917	490159	485729	488463	267565		551.939	14.817	Neg
153	577488	623134	676044	559518	467021	543809	463281	455366	505826	583810	474037	677957	525690	726168	420981	487140	557.974	14.892	Neg
154	1040288	1630334	1586857	1397031	1630108	1487403	1454264	1182138	1461049	1144450	1546707	1720108	1298768	1426670	1417720	1488296	559.972	14.941	Neg
155	1539688	1755954	1779611	1453734	1261450	1712797	1646372	1723825	1735031	1772759	1490828	1654135	1531229	1621352	1701303	1757810	561.968	14.917	Neg
156	241703																563.905	14.684	Neg
157			442641	498190	391471	442528	367382	805746	473770	436775	397648	223690	243734	342200	408933	253393	565.351	16.577	Neg
158	807427	716718	826945	919551	660998	659669	757825	604898	1273083	911580	858302	666000	730783	747189	663959	650639	565.903	14.746	Neg
159	1225401	1144684	1176867	1138269	1184992	1088136	1077068	1055454	1050864	1046503	1111332	1025784	956704	1096865	1072984	1098145	566.329	7.112	Neg
160	767085	1264571	910412	1255856	1051894	875680	885413	997191	1239037	967638	1086962	1139011	1185687	1197725	1032631	1024288	567.899	14.741	Neg
161	398221				346471	468037	438398		485492	425901	443625		398927	387820		316287	571.886	14.75	Neg
162	351490	356305	597859	450368	435212	402305	414422	380767	389074	326697	398251	539789	361453	550338	395960	343866	571.99	15.032	Neg
163	1138072	1031742	1129004	1110687	1060319	1067808	898329	944127	1142451	976668	965210	1189503	850341	1258915	983506	1048613	573.987	15.068	Neg
164	1261086	1376125	1396523	1230114	1292426	1384337	1244841		1147380	1233781	1040040	1033842	1177885	1363032	1241031	1290158	575.984	15.074	Neg
165	744067	1552016	1224959	1009630		821195	908072								886179		577.981	15.032	Neg
166						388515					266028			364288			579.976	15.047	Neg
167					266286			302680		249322							581.222	17.126	Neg
168	1440243	1480441	1467202	1403608		1550061	993089	1372932	1533644	1449396	1421445	1190154	1424388	1375304	1296331	1107826	583.91	14.851	Neg
169	487179	418090	564594	514919		472649	519200	545266		536899	492572	581472	328583	395918	544611	561695	588.003	15.23	Neg
170	1295857	1310016	1346499	1358892	1286886	1311765	1062952	1280957	1271978	1303392	1008739	1419712	1401222	1329958	1194536	1172872	589.905	21.685	Neg
171	515057	417016	446450	631768	561105	624407	644340	573396	435752	577440		678334	630392		395738	559079	589.999	15.217	Neg
172	1145946	1702570	1662015	1565782	1087255	1200710	1484261	1490192	1461935	1494376	1114075	1346850	1329079	1513797	1324719	1302783	593.933	14.931	Neg
173	365967	392405	315053	355306		474611	372818	322347	458395	377019	386019	390241	606889	442863	408327	273097	601.861	14.83	Neg
174					497124			654951		529018							609.253	19.026	Neg
175	1283483	1362548	1857012	1678729	1325700	1784260	1753924	1407641	1794397	1756920	1722216	1824535	701842	1527492	1766031	1612471	609.946	15.05	Neg
176	161879																613.817	22.056	Neg
177	494111	502746	728713	730749	647062	662004	599348	633063				664396	630976	676128	666830	557226	613.88	14.926	Neg
178	233503		108549			121324				113830							618.196	9.213	Neg
179	158956																620.194	9.209	Neg
180	475215	562352	430426	490512	574030	552305	527399	477865	447861	450390	483707	478433	555086	632738	652889	457119	621.964	15.179	Neg
181			75051		217613												628.915	21.828	Neg
182	1157396	1121956	1346930	1436832	1393816	1324376	1420947	1442792	1409651	1499374	1515648	1657201	1506389	1322787	1426867	1375801	629.892	14.996	Neg
183	804174	1027157	1069842	920790	928605	1014950	1013150	982045	968567	1016846	967014	1200357	869115	1213820	1048134	929557	641.91	15.083	Neg
184	1431810	1531548	1573840	1508049	1167946	1463963	1433464	1400385	1304167	1921910	1346225	1696141	1400744	1302715	1331102	1523104	643.907	15.085	Neg
185	895555	847318	839493	730845	864958	837854	777229	778411	801702	814634	613021	877657	843596	736563	773907	824248	657.892	21.685	Neg
186	941990	1656765	954118	1602016	1050829	1063599	1448996	835986	788256	818071	747898	460062	1061031	1107730	1033820	1489659	659.919	15.175	Neg
187						468255			1099639		409404						665.316	19.375	Neg
188	351268	352420		393442	447453	328959	296938	290797	310861	331892	364755	360089	200806	393436	302704	258251	667.067	17.091	Neg
189			150847														673.145	13.003	Neg
190	936175	874673	851382	847401	807453	864772	861419	826473	866605	1098607	803964	917688	747320	712180	808447	834964	677.868	15.167	Neg
191	92381	72612	83830	84034	87098	84197	95986	86616	56543	86456	44939	74017	75758	52251	81547		715.85	21.625	Neg
192															401344	499960	723.52	14.063	Neg
193	143080	235584	558829	138814	173358	251157	198622	135997		119545	123001	108421		118035	111783	111396	724.143	12.984	Neg
194	657529	678361	636398	651134	624930	630060	578659	664764	609095	604103	501143	622199	607580	678542	555626	575729	725.88	21.683	Neg
195	139997	143696	124604	147166	118390	111656	140828		115439					116670			741.853	21.722	Neg
196	1167406		1018858	1163456	1047528	892415	1259185	1710313	831806	511537				435606	841445	1012297	748.572	13.886	Neg
197					357820	483314	667300	657363	623121	652514	605171	607848	485461				751.552	14.064	Neg
198		334280	537082	662859	531483	387736	519806	443130	485042								767.546	14.065	Neg
199	222773	226545	215530	218395	209058	202276	209975	210936	190773	210645	205224	210543	212538	199161	196975	206176	779.951	14.101	Neg
200	560209	505673	485781	507974	503809	516233	477263	478721	469917	467436	522696	560084	551787	522693	442847	528228	793.867	21.689	Neg
201	74846	64976	72025	82246	76409	73043	56773		53404	79172	37182	78963	55667	56222	46739		851.826	21.636	Neg
202	395809	376193	349114	368936	368502	368345	353799	357057	356635	355613	381353	359895	363452	361981	320521	315228	861.855	21.697	Neg
203					253712	331793	409931	439006	417468	457359	435643	523018	516939	440042	375016	414338	886.557	21.673	Neg
204	1721708	1220053	1034521	739932	1077377	1302627	1235152	997374	1394284	1386813	1414010	1070443	1464616	1434970	1494146	1168641	102.948	22.223	Pos
205	1796701	557627	1111336	838062	1179249	1302627											102.948	22.31	Pos
206	92271	82082		142509			114416	191525	91180	109850	105847	98218	135866	72470		100702	104.062	12.342	Pos
207	445804	274537	274213	294774		374749	405826	427069	609456	566005	542269	403385	580769	514986	506797	604987	104.947	22.263	Pos
208	3716606	4051517	4361932	4509205	4834147	4840243	5113979	5402142	5601183	5644955	5475108	5623273	5844587	5822725	5564401	5720928	117.079	21.791	Pos
209	629493	629228	609900	608074	588367	532608	487356	477721	514363	533394	485218	459011	462907	433082	429952	454143	120.021	16.313	Pos
210	523953	530006	515138	439229	504452	479243	460363	438716	467281	406324	409224	465975	454801	445476	408094	436116	120.021	14.011	Pos
211	537005	518646	520879	524635	217655	490414	540257	505582	527675	530117	540418	527281	500513	513388	511691	521077	121.089	4.764	Pos
212		175126	166381	166530	175385	167987	176554	175957		178815	173355	168727	182849	175991	183104	188022	122.035	10.976	Pos
213	534103	2355764	918420	1682178	1272943	1412402	843279	801776	1346135	1337785	462619	1480702	669797	1131327	1086326	2707983	122.073	11.001	Pos
214	110547	182710	319691	367769	90212	144380	182840	172399	308214	182831	226852	210009	162907	142154	187689	274632	122.073	7.161	Pos
215	5817999	6743328	5547086	6552482	6583622	6353194	5555366	6579944	6675135	6778832	5514694	6613454	5399054	6884298	5327853	6627843	122.074	10.406	Pos
216	1119748	1375909	1401588	660743	1495919	1246328	1697400	1532698	1084871	1225072	1013608	640314	1442081	257497	999227	1152342	124.979	22.635	Pos
217	253071	205171	219790	239092	232775	238901	257793	263272		228828		264794	228995	235218	290649	241414	126.068	9.145	Pos
218	1368518	1344564	1265535	1489989	1500464	1450974	1518569	1439677	1203902	1435026	1319954	1361733	1352275	1108334	1254701	1330139	134.036	13.769	Pos
219		205022	207656	211005	222905	219739		203844	223479	207977	205507	226456	218238	244061	211677	215304	136.05	10.991	Pos
220	441234	378233	440581	383432	428676	336881	443485	465010	476986	478635	541349	389129	464864	460317	500523	422582	136.089	8.909	Pos
221	188923	136637		155183	142736	95767	200899	191934	214194	159836	211576	171716	187982	198508	213697	173322	136.089	9.574	Pos
222						212849	153621	404406	471167	330756	346992	377018	555539	461210	301711	412909	138.98	13.963	Pos
223	579123	229599	1094461	1634496	1654341	1808537	2070406	1982976	2197083	2248519	2071202	2462895	2456402	2334318	2479320	2427055	138.981	22.12	Pos
224	669433	942186	1125126	1466708	1578146	1871872	2063806										138.981	22.201	Pos
225	5126958	3813987	3511170	3632533	3714903	4071912	4384404	4143451	4480886	3115703	4039098	4176749	4477215	4650603	4690915	4504666	143.975	22.239	Pos
226	977475	1843353	1455263	1697589	1653598	1662858	1932066	1416870		1874668	1851475	1690439	1924011		2075535	1979661	145.973	22.259	Pos
227	977739	1726483	840403	1666274	1529121	1659628	1871906	1399097	1865074	1770789	1721154	1784406	1897582	1912428	1968269	1528709	145.973	22.233	Pos
228	7575199	7767451	7157374	6686544	7022686	7010668	6434608	6390183	6377919	5368926	5824332	6192933	5554085	6093730	5020743	5886632	148.016	14.004	Pos
229	5229278	5084256	4761240	4731830	4651138	4320906	4066581	4005304	3912305	3862778	4092641	3581379	3738550	3683699	3544387	3809662	148.016	16.328	Pos
230	324816	315037						380994	325290		332108		321037		325981	327083	150.13	13.086	Pos
231	353185	440703	367562	368925	368754	387764	438592	454816	405643	440500	445001	444262	456708	457045	437496	469805	152.084	7.677	Pos
232	240249	290897	308669	292161	378036	321663	413064	408325	423337	358720	424141	405967	373894	442313	439625	458869	155.035	21.81	Pos
233	923071	903117	913559	892362	914386	877394	650907	856705	648715	851071	875417	815703	837860	862132	677248	743757	157.089	4.18	Pos
234	1293828	1136479	1108442	800774	1059808	965123	1070864	972130	1074040	1151893	1131128	936273	1008859	854424	1115079	1039203	157.146	11.983	Pos
235	249919	254260	242211	160293	187281	207726	209727	215847	146926	214036	230970	206355	209624	179598	212226	209831	157.957	21.668	Pos
236	220198		198167	227823			204565	206046	203454	233446	197008	224955	207783	236286	210978	229682	158.109	10.949	Pos
237	135157	134295	145577	148718	112992	141535	155078	132786	129619	114084	125153	162486	109755	119749	151489	132891	159.105	4.185	Pos
238	3140432	2746515	2158825	2266832	2356879	1815238	1465715	1371030	1219075	1100787	1171970	1034160	974624	940491	1238829	941452	160.052	14.748	Pos
239	927047	917390	872572	734480	868888	841267	853835		598580	696541	750051	573143	817978	760621	694402	744734	160.089	13.755	Pos
240									311658	316710							162.069	13.807	Pos
241	246747	291707	313969	336529	354016	340549	382041	406846	451843	396014	443557	396492	423354	469009	384176	482886	163.12	21.594	Pos
242					128122			150936	140199	110326	138932			150876	166498		166.064	9.218	Pos
243	325522	358520	230937	281941	315472	359448	280938	393898	350553	380071	381611	352603	388960	396151	366395	418849	166.136	11.35	Pos
244	190836	161182	183000	196447	194880	203124	178915	191963	194063	195710	207503	206325	180587	202598	182267		167.132	21.584	Pos
245	2707303	2734807	2372324	2303647	2448543	2558159	2618457	2449946	2833393	2504642	2881000	2519599	2816915	2635570	2499062	2759446	168.079	6.762	Pos
246	199668		153551		228568	105331	299226	94337	282496	311061	160901	84970	155722	315883	156511	239503	168.079	6.302	Pos
247	236866	241768	239905	205925	265177	229552	264605	219559	225265	267443	241237	257569	273629	275376	271911	265358	168.079	8.808	Pos
248	121488	127653	123748		111026	134016	131191	134726			140807	142168	142873	132832	127524	128866	168.079	9.855	Pos
249					122674		159703		144027	115338	181113	128704			260192		168.079	7.488	Pos
250	485457	488146	462830	540625	452101	465001	473388	427838	469967	473995	419814	441867		405544	459822	395254	170.092	6.257	Pos
251	7610367	7603903	7360695	7088868	7520148	6862089	7525068	8402962	6705069	8732089	7095789	7184442	6979356	7374617	7066123	6932177	170.131	14.788	Pos
252	512652	532799	483778	505028	520966	526495	522006	541045	482469	481827	500607	398403	470074	424150	489655	486228	172.071	4.629	Pos
253			122949				152738		150398		151819	167508	169917	145993		157884	176.082	10.4	Pos
254	2123669	2100716	1440062	1566802	1649808	781765	1560250	1579936	1525018	1575769	1546984	936608	1517273	1582379	1372802	1555086	177.116	4.711	Pos
255	160105	163889	144221	177862	167924	149796	154870	156003	149221	149687	148971	140038	144153	155635	147363	151261	177.116	1.305	Pos
256	536004	494887	528928	594891	644775	647390	541329	620385	548634	604430	541495	639570	653657	613690	665394	665440	178.061	11.003	Pos
257	1308755	926914	836560	813549	717229	715392	640531	641150	573892	502604	489696	495146	554460	421812	619490	589288	178.063	14.748	Pos
258	416040	412694	380810	380347	402170	396276	402729	422031	397503	412312	410459	425314	464624	429076	436128	420585	178.1	10.945	Pos
259	278792	249777	242923	256959	249036	235731	290680	250956	236727	258077	222461	257626	310294	248446	272026	274731	178.1	11.551	Pos
260	848990	840222	917644	884441	980548	989652	1182996	955000	993304	1173161	1059269	1064142	972112	1121041	1039265	1287251	180.076	5.666	Pos
261	446589	453861	429561	394842	443083	423796	394957	400591	357278	369828	408719	231666	421061		405834	399957	183.161	12.267	Pos
262				210876	248200	261570	313408		291550	304671	282857	347708	295685	314020	325616	343047	183.979	22.116	Pos
263	836238	846604	866812	826766	742984	825258	794519	760260	789257	753763	769667	808403	648739	732191	766055	752614	184.108	8.224	Pos
264	880352	1036214	1036582	603783	1037048	1023699	1090675	1114333	1219578	1164785	1122924	1072016	1181983	1114624	1153601	1095564	184.147	11.351	Pos
265	247318	259302	251897	273219	273034	265890	282088	276081	283487	295176	271825	299366	284438	304817	290138	303607	192.077	7.69	Pos
266	245589	270162	247997	259416	265396	265419	256459	248412	256133	255392	244011	253037	265740	248320	259132	255009	193.109	7.315	Pos
267	404439	424371	448027	490290	432421	490379	454517	523037	502053	480753	495906	530406	477649	558085	498228	619995	194.093	6.179	Pos
268	2020214	2096633	2059448	2095479	2078885	2042337	2025861	1998230	1982462	1981706	1901552	1964702	1910885	2008432	1970740	1911138	194.116	5.015	Pos
269	672991	642352	608020	550369	576892	577036	678730	544769	620339	617755	614827	554718	627156	635286	588731	638065	194.131	10.636	Pos
270	182428	206112	180241	201661	180857	236649	170983	177933	163225	176137	175547	184350	190537	181216	164896	169566	195.163	11.803	Pos
271	1017449	1023377	812421	1006689	901593	1077017	919545	603282	653666	981928	788719	1009711	677469	1221303	920437	1023192	196.071	6.632	Pos
272					165640		197312			272724	218812	281448	253759	297843	245820	266856	196.071	6.096	Pos
273	348933							360281	276411		289315	355481	316936		353577	248008	196.11	8.899	Pos
274	231740	194761	203860	241193	208846	203365	185997	248573	206317	216197	196084	192303	206473	241527	203718	211171	197.179	12.969	Pos
275	818380	635886	601436	635118	620655	697059	602525	608504	595285	619945	710990	670126	656805	624359	587562	590459	197.179	11.77	Pos
276	1714050	1900784	1664837	1754459	1633526	1691881	1658790	1743605	1576322	1543109	1502823	1441943	1496333	968713	1452596	1478332	199.194	13.462	Pos
277	1983233	1888864	1729909	1603346	1584390	1494243	1451521	1435336	1401107	1407041	1324663	1331272	1338764	1084832	1282645	1369264	199.23	12.14	Pos
278	219902	364696	298408	297857	314818	221116	226333	323598	439429		305933	194496			241111	259690	203.116	2.237	Pos
279	590709	599266	536941	576152	565101	551356	532722	534271									204.078	14.016	Pos
280	210260	213867	226691	245341	234816	218162	246958	205270	212131	227472	212384	241306	219231	246524	215507	241775	205.132	5.063	Pos
281	85708			263316	239707	257823		167055	167869	118917	204797	189765	105575				206.167	14.019	Pos
282	486392	502095	523941	511793	564076	522738	532274	599655	560707	583989	585991	618337	597326	627506	666360	635894	208.072	6.316	Pos
283	887365	747529	796128	725028	761076	867323	769042	658726	759531	780296	705653	819248	673353	728451	668095	810863	208.146	12.497	Pos
284	2183315	1029411	1245799	1444429	813293			1709100		694685	1031511		2153610	744640	928608	1132015	208.147	15.298	Pos
285	2411891	2435337	2489562	2522962	2439962	2423078	2476163	2374079	2474073	2469718	2392682	2425670	2522595	2422983	2436164	2388117	208.147	12.489	Pos
286	254281	140393	137139	150447	193871	220683	149319	121146		148040		126388	101505	117560			208.147	13.235	Pos
287	198341	202414	205323	207567	194987	194091	198981	201134	186902	175001	209040	200609	216318	187716	190731	211771	208.158	5.734	Pos
288	260682	258698	243583	278355	279992	291757	300492	305880	316221	281503	314655	309246	288955	304439	285536	326830	210.087	6.893	Pos
289			203870	254559		241994	255249	290913	237132	204010		231744	206008	243747	195412	186226	210.161	13.545	Pos
290	150575	155582	137497	146739	133934	112571	115784	114679	102065	75502	95799	105601	98372		99124	81953	211.228	12.291	Pos
291	324046	172840	565590	305236	207712	341176	330817	519399	194602	594320	837164	172972	248309	213126	303630	259437	211.23	12.835	Pos
292	89939	94180	88647	83091	84086	77130	78403	83300	73629	72851	63543	72414	70828	76147	76520	69467	211.23	21.777	Pos
293			575024	394306	586809	366705	610373	649620	571448	546954	657763	614004			340264	516552	212.14	10.77	Pos
294	5894480	5321089	5567951	5466873	5259584	4952427	5042626	4977603	4948643	4963185	4794827	4861554	4776805	4713508	5162343	4804953	213.245	12.252	Pos
295	986654	1006568	1001278	1010648	1059465	1049526	1040351	915434	920596	970908	970915	1067566	860293	1018462	855233	1004685	213.246	21.758	Pos
296	182737	195916	185963	217350	172860	162707	215005	228170		143123	181124	150694	154562	192462	161036	147947	214.12	6.332	Pos
297	287557	277984	257039	289839	278917	285623	344083	329225	286891	308615	291225	304321	312277	291127	301638	295493	214.121	9.561	Pos
298	399476	377066	419653	382973	372309	394248	399715	413821	425413	460796	398030	411816	417126	396392	399748	426900	214.121	10.671	Pos
299	71676	84388	97257	98485	94602	97717	114912	108933	111968	110068	121230	111681	125199	116057	113413	118563	215.916	21.589	Pos
300	162837	196026	188114	187765	166038	180241	181284	174675	181486	185101	178727	182012	183153	176481	175485	190085	217.205	8.641	Pos
301	964644	765085	676155	690409	489300	540843	413646	857751	443642	385775	373699	347399	419883	347454	331933	346275	218.167	16.575	Pos
302	299819	252555	274281	271351	251715	289897	352633	315014	242448	175819	226651	8523			103595		222.053	14.418	Pos
303	108330	146250	113266	136833	127538	152442	163473	147494	154411	128235	156425					129986	222.057	14.898	Pos
304	470924	444454	470785	441470	452402	461574	333130	472440	477928	469571	515253	517158	550119	479916	432161	476421	224.103	5.779	Pos
305	154988	147365	145532	161418	139960	148276	178756	148799	159075	157601	151127	169398	149429	149920	149879	158932	225.137	5.815	Pos
306	309722		219254	116279		481620	136051	134770	376213	425910	99043		125682				225.246	10.024	Pos
307	1646157	2840687	1668649	1449815	2896142	748479	1973083	1604456	1955911	1210027	1753691	1908943	1545546	1719900	1846738	1189500	225.945	13.548	Pos
308	1580235	1449932	1420137	1435767	1371673	912056	887146	957324	880939	892145	1148368	1067366	1220574	805090	743254	811609	225.945	21.656	Pos
309	1024092	1008928	886609	872560	1028251	816577	853119	934220	844416	903624	988125	791933	986003	834116	900759	828001	226.121	11.387	Pos
310	10184419	10075086	9745746	9489361	10088541	9792908	9180718	9291063	9853580	9320922	9116246	9275684	8677025	9569700	9448957	9544717	226.169	5.747	Pos
311	2557363	3283859	3552917	3250859	3125618	3136141	3237860	3146151	3665607	3558419	4168220	3423898	4497405	3517133	3261243	3183541	226.194	13.068	Pos
312	1091519	887687	941390	955306	854565	822685	898560	1137953	904674	967045	1124649	888038	1377199	992269	997741	1070487	227.189	11.821	Pos
313	1427896	1002269	938248	1035602	540677	458201	457559	1282308	414351	560637	823287	409545	1540922	534701	763225	835376	227.189	15.331	Pos
314	1277251	1341991	1234224	1127896	963153	754584	787428	657164	644034	650070	517228	472992	537848	751868	563485	432168	227.222	14.599	Pos
315	1578479	1381382	1300337	1282198	921439	1158746	884833	1061428	1100142	1103404	1103116	1102733	882813		1041970	1078647	227.26	12.315	Pos
316	174507	180080	163515	166030	163357	163995	144452	159787	165225	158808	154779	155509	178171	166076	163808	146365	227.261	21.787	Pos
317	2808335	2918577	2990354	3192341	2407042	3359054	3236647	3713881	3891218	3414562	3971441	4149866	3745762	3718286	4398141	4445726	227.262	12.737	Pos
318	152624	149646	153448	168062	190771	159194	168832	171799	157555	158770	173109	170950	186978	221839	201099	177047	228.098	6.363	Pos
319	165104	163280	153473	145424	169552	157209	176584	155826	147435	159209	168521	172366	167363	158224	169610	149125	228.098	6.791	Pos
320	495393	520175	487052	472911	516292	494187	523807	482977	494136	508560	496809	487590	499260	514716	490168	445681	228.1	8.805	Pos
321	22415598	22000264	21146834	18395128	17989506	17972152	16867328	15035520	14387616	13514351	13866149	13538629	13848804	11884985	12388946	12735913	229.239	12.29	Pos
322	22305656	21899152		18298276	17908176	17903740	16802464	14979814	14331155	13460047	13816262	13494357	13784283	11842718	12338841	12857783	229.24	12.289	Pos
323	7980508	7550910	7345832	7301437	6404360	6157790	6547773	6019549	6495376	6060281	6641270	6529448	6030544	5903701	6330465	6106548	229.241	21.778	Pos
324	247952	250892	261769	239378	258606	225637	264564	280637	288725	278890	257224	271802	246475	252613	261633	245265	230.077	5.078	Pos
325	237292	264842	267573	278742	276770	230157	261709	291691	248545	267988	269337	295868	245403	265262	233786	261427	234.124	10.618	Pos
326	412999	428277	391704	406147	363457	377297	441579	803755	383077	431829	367763	405343	438642	464947	361810	363694	236.103	8.859	Pos
327	2423789	2625545	2800219	2859771	2780117	2758018	2772090	2743568	2853699	2785675	2783603	2619149	2742392	2756491	2983757	2757858	236.103	9.574	Pos
328	223422	131153	114191	181733	129684	152132	156204	127157	247453	132068	204943	135936	135273	116944	137400	177186	236.139	9.855	Pos
329	658440	702875	591479	636534	587678	601956	685480	634143	652666	596684	584818	643913	622141	567478	640680	682676	236.142	10.954	Pos
330	151689	153933	133777	132503	154021	111337	143882	112245		103526	104570	553323	128795	374967	145616	635845	236.178	12.651	Pos
331	177245	165096	155930		145529	219846	188168		241657	141874		350518	247811	249884	184797	146983	238.118	10.668	Pos
332	235981	377603	221620	383422	274052	238292	260192	273825	223702	230778	256284	248771	264805	257061	249982	277547	238.119	8.931	Pos
333	3730679	3829686	3630941	3708714	3870218	3735188	3555970	3622790	3639860	3763510	3593827	3627448	3580334	3509631	3657066	3551202	238.142	5.377	Pos
334	78555	91787	121128	109892	100221	88066	98333	97483	95859	101027	101452	105889	111290	113128	122481	116430	239.225	21.922	Pos
335	300258	296079	298653	370745	239496	268051	281336	295372	245042	321650	243968	278810	254233	282889	268131	311572	239.225	11.906	Pos
336	391257	384277	369327	375982	383322	342957	373204	402863	379155	356451	367464	393840	389757	364220	331342	357192	240.148	4.977	Pos
337	460394	453390	310826	359252	358777	307326	297723	287914	243385	237214	190813	209007	221688	184569	215544	202966	241.239	14.665	Pos
338	153017	161898	154153	151954	123968	144516	136954	143830	158907	149883	139677	151178	150393	127876	145395	138112	241.277	21.8	Pos
339	1059371	1222033	1203679	1303800	1365652	1205188	1464951	1367532	1448190	1385531	1585146	1678853	1727579	1646273	1560265	1804851	241.277	12.835	Pos
340	309259	282189	296668	375772	337121	319395	344427	276555	332886	384017	278163	377712	295928	286842	294805	279826	241.277	11.407	Pos
341	166085	204004	199903		207036	170535	225343	192057	223132	228613	190074	225562		204196	216627	199890	242.128	13.598	Pos
342	167938	204153	199709		208870	191886	225886	192057	223772	228613	189636	225562		214891	216627	200498	242.128	13.598	Pos
343	970938	471850	564933	668438	393747	260925	303357	780303	264991	397575	495271	255578	914224	334037	449457	519437	243.184	15.345	Pos
344	542095	443599	484705	406514	479067	423260	396184	420333	382793	420220	379484	364637	408328	372522	351139	408535	243.256	12.264	Pos
345	282542	266620	260051	266358	286606	268239	269482	268739	259058	275893	267733	277457	268846	266563	260338	271681	245.236	10.572	Pos
346	438899	404908	380581	377900	325062	317185	299567	280201	246835			211521		191908	212720		246.234	15.146	Pos
347	568832	593886	585800	581944	579493	566313	579291	560057	572704	599954	595905	546522	574587	602029	544927	530192	247.215	6.56	Pos
348	133646	137882	143438	151405	130028	136788	142386	153688	143133	151464	153085	164429	160835	139059	161285	159388	248.103	9.137	Pos
349	160516	183838	203611	171421	184291	178210	181658	175234	160401	200217	184029	162005	167878	169346	176652	196161	248.103	9.853	Pos
350	165739	116096	180641	175956		147258			127949	144824							248.178	13.66	Pos
351	201552	208047	199555	201598	203925	192789	205903	192275	193322	218655	219790	243483	188779	209113	214901	218085	250.155	8.977	Pos
352	544520	597008	588063	735203	581093	642761	558054	558211	578665	645183	609173	558857	563502	600754	621454	608023	252.077	9.574	Pos
353	3936157	4160328	4131027	4284866	4259963	4212423	4411467	4295333	4505035	4448636	4367076	4328575	4371752	4436644	4244862	4194106	252.098	10.99	Pos
354	456356	477407	445527	457058	473992	405565	472891	444026	461612	475277	462096	476049	461959	427290	450648	457209	252.121	5.454	Pos
355	220340	210167	216565	215758	230041	241106	216948	229698	190750	238882	193698	221997	126344	218759	276423	263142	252.135	10.022	Pos
356	207219	223024	221993	213294	201420	217788	187926	207175	225635	209067	208169	206282	198236	210689	195387	214796	252.157	5.842	Pos
357	213782		91178			114831				122719	87003						253.101	9.225	Pos
358	879634	831789	648755	714016	863898	848490	658681	704880	826364	741101	742640	732551	867744	699187	712267	848673	254.113	6.214	Pos
359	1427639	1562773	1516306	1440220	1503928	1376793	1476175	1390504	1454003	1478735	1389820	1012058	1361101	1363955	1478904	1389485	254.113	6.951	Pos
360	900192	870314	884063	889832	785323	787011	787267	984639	926773	837049	398971	473571	1002888	947792	905516	948503	254.113	7.427	Pos
361	461628	560782	607674	561063	550589	562799	708570	582890	589481	614613	729461	559183	744721		590805	638447	254.151	12.108	Pos
362	232163	146179	179839	192164	153772	169657	191458	181125	200763	163585	433239	580085	270698	663228	235718	186371	254.189	12.649	Pos
363	1073650	1511072	768015	1318919	689736	1109952	1026324	1138415	954023	819985	825662	821574	935126	761616	794966	642117	255.256	14.982	Pos
364	1187653	1972021	2017197	1872725	1814833	1718958	1602117	1525945	1568690	1409251	1418779	1397096	1365044	636131	1310805	1329609	255.257	15.483	Pos
365	574366	617999	306957	315199	265997	684189	575237	287761	361836	365458	606335	304250	311147	615097	625291	388770	256.168	12.398	Pos
366	211751	285550	226903	214482	160950	318420	372069	221229	249645	232288	200101	231983	248357	283036	427345	239876	256.168	11.861	Pos
367		203549		194021	179308	221432	175333	189985	208888	181698	173009	189626	223435	198152	202569	206425	257.235	13.932	Pos
368	4660962	4604967	3571320	4168562	4269240	4011334	7261757	4228157	7666280	7921537	7708835	7970924	7928643	7855254	7774899	7717848	257.272	12.838	Pos
369	5074719	4511642	4349374	4610934	4027348	3881590	3868554	3792371	3956189	4092232	3640448	3834097	3733777	3641960	3588358	3575829	257.273	21.815	Pos
370	1228268	1185513	1200121	1214733	1203364	1180294	1219496	1207654	1228583	1190496	1168926	1167421	1187008	1198724	1214225	1231665	260.103	11.404	Pos
371	68488	72201	78336	94070	84768	75804	65718	75246	75931	73795	74990	97206	67144	84800	72437	84887	261.173	21.741	Pos
372		610198	743983	854565	752967	865793	720342	786595	854976	776128	839906	824837	945655	846979	821357	695111	262.155	12.45	Pos
373	4528046	3949429	3357677	3102621	2949786	2643386	2391151	2403073	1936304	1873135	1831541	1601325	1299996	1161560		971328	262.226	14.539	Pos
374	347008	358388	343971	336519	354554	324709	309071	302199	293176	310722	279661	293831	286156	309612	267153	278492	264.125	5.747	Pos
375	334399	314370	308288	332341	321172	295163	294777	285785	298262	282042	296111	299493	277123	288671	266732	249724	264.144	5.794	Pos
376	46621436	43214736	38767900	37062888	34961236	32976848	28899492	31187000	25707132	24952652	23979460	22830820	21480176	21976992	21023478	21310156	264.246	15.131	Pos
377	657795	693040	795589	898110	793113	546595	845210	700105	773562	615595	749473	597376	359597	697592	470799	833133	264.955	13.764	Pos
378	182142	180686	153885	277605	187343	189530	230953	326686	208197	237416	197426	294977	225032	314845	247649	171152	266.115	12.338	Pos
379	211430	205015	206266	139712	151469	181736	196264	193236	200524	179897	185659	181788	193221	157418	122725	187389	266.15	7.94	Pos
380	1273718	1342464	1690730	1871415	1578086	1610471	1969237	2490078	2532221	2415200	2149934	2220341	2258247	2123048	2467594	2317499	266.166	13.605	Pos
381	729621	947677	865609	957443	933662	957177	1044700	967207	1043858	995411	829001	1013295	1028308	923709	989083	969510	268.072	11.001	Pos
382		137604	157411	134923	114916	148109	115878	155576	157102	115776	154466	144381	142427	164177	161083	145378	268.129	10.303	Pos
383	654525	913315	745504	757420	1708145	781626	829803	621631	756580	655405	802262	1264137	853998	691825	797885	797592	268.129	8.728	Pos
384	136740	176647	200567	208934	306745	112625	227268	307824	236182	182241	211883	37607	160789	148795	183524	247166	268.13	8.071	Pos
385	366211	278199	327279	384886	382477	382242	351763	343766	422318	385388	326489	406967	399296	403999	324897	387589	268.131	10.835	Pos
386	283452	279443	281842	280861	284868	271438	277407	205165	266977	258940	258922	284936	243226	261422	275459	273601	268.165	6.981	Pos
387	677537	613358	307693	568314	391559	535548	536482	465495	534688	403875	414945	436039	392093	412985	392794	375993	269.272	15.065	Pos
388	276256	285559	293319	293116	237796	220483	319809	312836	259837	275892	291657	189187	348539	275915		319828	270.087	6.947	Pos
389	122971	147013	156495	127716	133937	156599	156157	124945	169791	172166	164810	141740	118496	157987		136611	270.088	6.226	Pos
390	321199	417830	346797	435911	426912	408161	411561	420330	449951	417561	475229	463460	459329	446866	461637	540501	270.107	7.008	Pos
391			185880	173964	158153	189832	145056	107886	174583	119978	186041	171807	186642		153279		270.107	7.477	Pos
392	295985	348683	391325	416829	467824	379442	367822	368693	290719	377855	461179	464955	451915	439227	421941	452740	270.108	7.926	Pos
393		302506	288906	280010	256449	221657	219203	214948		187307							270.141	14.348	Pos
394	895355	712951	716232	594497	534511	489792	486827	406355	398086	408562		311287	266932	297077	274005	280589	271.249	14.165	Pos
395	324767	316073	311573	278707	239488	264085	227190	251868	246838	218600	244770	206496	232008	236295	209122	224996	271.25	12.242	Pos
396	198708	212891	204164	215791	215607	217995	231465	223153	223298	220631	227436	224934	219306	222188	218598	290507	271.251	21.904	Pos
397	277011	233372	243325	201960	221986	241565	233393	218914	231042	243834	259420	178692	243201	195478	241574	212010	272.161	7.575	Pos
398	1857899	1781185	1736370	1684990	1648053	1650354	1637744	1636898	1615774	1490208	1535073	1513810	1500496	1601428	1589867	1537999	273.267	11.907	Pos
399	168033	163818	170777	183158	167230	159554	147218	158723	134756	150305	156656	168393	158768	135823	140554	154890	278.088	11.887	Pos
400	2912397	2736979	2401595	2526005	2426244	2193553	2501449	2152044	2126798	2042359	1823179	2122693	2198199	1930952	1959090	1966768	278.151	13.999	Pos
401	643459	564521	625475	646292	601574	534703	531689	537646	521970	423927	186195	434253	525702	491991	316331	155984	280.24	14.058	Pos
402	4945044	4818463	4639790	4848058	4946824	4743036	4645643	4719792	4620338	4845916	4821628	4816893	4628812	4571008	4738114	4690789	282.168	5.661	Pos
403	264434	364605	354510		295512	411834	250200		270169	283663	397674	462242	245188	288458	252676	261001	282.257	15.861	Pos
404	830633	676354	685265	784513	636947	545101	556150	794504	536360	462869			647375		454357	455970	283.287	16.133	Pos
405	2558910	2617933	2086096	2456497	2521826	2463497	2479831	2400346	2484375	2608899	2510456	2483089	2340182	2351183	2351627	2177986	283.325	13.301	Pos
406	389026	416749	419660	365920	412803	497762	438169	428970	417871	422094	419898	361444	355090	382229	428688	418091	283.325	21.831	Pos
407	249968	281953	317742	411805	423895	427853	458942	460218	458397	458702	463335	460958	501903	462611	461599	464447	283.906	22.054	Pos
408	598426	559519	806431	867538	842610	1165324	1460539	1649443	1656212	1765548	1838407	1932356	2045047	2192523	2212463	2485490	284.199	13.215	Pos
409	673552	670955	593488	611944	634794	558443	698076	616687	571438	592553	613145	569274	555658	575990	551359	577161	285.304	13.254	Pos
410	500211	490985	467556	462831	466213	420981	422148	417836	469315	394681	432962	399195	397196	402113	378538	389299	285.304	21.866	Pos
411	1247514	1309849	1370308	1350114	1401782	1420264	1482589	1477365	1442292	1463724	1444493	1407217	1444134	1478486	1473672	1505738	287.246	12.14	Pos
412	2102169	2174361	2368060	2659617	2757943	2708614	3256848	3305550	3529763	3136351	3168197	3580576	3600306	3723565	3650664	3810299	287.247	12.981	Pos
413	467219	475736	545489	431500	434950	420610	384867	393742	365642	251778	299354	405806	424722	425065	92317	202748	287.28	12.147	Pos
414	402128	420587	357719	394021	384739	389045	353018	353479	337999	356501	316962	306222	320144	354931	303471	375653	289.262	11.983	Pos
415	289649	235081	191724	179546	149282	182603											290.187	14.731	Pos
416	307387	314877	356815	511831	371826	313078	467141	409158	451904	557155	444595		565245	639349	477717		290.248	13.9	Pos
417						146106	172200	175588	196646	189107	197376	203567	205132	214180	212596	213544	290.883	22.101	Pos
418		90284	127279	118841	118730	135032		128748	145606	137388	122656	134812	145329		136092	137121	292.108	12.136	Pos
419	348161	432503	393978	434753	378234	436900	424431	453189	490533	409830	443132	402406	407481	434384	406454	457838	292.129	11.61	Pos
420	534966	505169	602834	485413	538696	572981	504792	562582	570919	593280	528680	588637	614752	569254	578096	530499	292.129	9.827	Pos
421	194919	217550	187880	238697	219750	273278	238778	247026	283543	227744	276101	259567	247122	210466	242520	253174	292.13	12.734	Pos
422	272887	340113	344931	396232	372522	381751	399931	438629	410480	405684	408015	422162	307349	405894	459696	369284	292.165	12.832	Pos
423	1957289	1752454	1510803	2179600	1578499	677628	1144886	4061503	1007792	855117	1332550	847554	4369152	998233	1575213	1250633	292.276	16.129	Pos
424										132737		137759	150060	147871	143289	147860	292.878	22.09	Pos
425	1517714	1500754	1648230		1598791	1582406	1567462	2701823	1661974	1580777	1596402	1656150	1598616	1420169	1501027	1728328	295.25	13.654	Pos
426	638769	652545	577952	582310	633667	645827	577603	567428	639233	651778	660034	639496	574272	639716	602263	611774	296.147	5.76	Pos
427																620161	297.265	14.018	Pos
428	684519	601118		655993	662472	633138	592787	1044495	573092			653861	668800	586752	595171		297.265	14.014	Pos
429		192035	350584	391827	279834	273672	255473	411022	481455		343352		393669	282475	256347	297475	297.34	13.61	Pos
430	191169		204627	198153	214048	221013	229846	217719	233227	234921	221129	222731	219973	216472	235668	220914	300.278	11.924	Pos
431	122273	129128	152222	128163	135420	127519	117235	140669	124928	131712	134532	119514	105189	129489	134779	143474	301.189	5.285	Pos
432				149006			171325	201058	124728	177696	199734	210291	146299	204301	236887	158175	301.298	12.52	Pos
433	2381741	2441362	1845320	2350707	2459738	2531774	2567949	2460239	1937661	2355553	2323772	2469106	2284585	2351097	2367406	2375409	303.293	21.766	Pos
434	23153084	15031887	48781628	17726568	17537936	29511922	17264100	46782808	18980508	42587208	68221024	14339986	22804032	19370040	25654840	19493556	303.293	12.821	Pos
435		250489	275125	293026	315139	325869	372292	428558	426292	410991	408819	382191	377981	410782	455243	463439	306.24	12.981	Pos
436		359763		296662	272677			482894	276462		381763				332578	468516	307.084	2.371	Pos
437		660962	338780	603402	693767	348174	344710	888186	575249		788710	307055			696261	1125122	307.084	2.368	Pos
438				33605	86358	81764			107210	92631	93089	67289		107311		68173	308.103	12.721	Pos
439	248045	261032	238395	239418	248417	260723	239478	234614	245283	259213	244882	252541	240325	237540	258462	247226	308.16	10.87	Pos
440	256260	300379	266476	275115	264281	240284	254407	255108	261840	235688	258535	239212	232334	242842	240135	250136	308.22	8.593	Pos
441	301643	274831	257928	235459	157822	306100	268663	274223	296561	292320	316713	275686	290882	296829	307531	304033	310.083	6.895	Pos
442					918830	821736	811450	817901									310.119	14.728	Pos
443							800498	770154	652497	738816	750803	674436	843451				310.119	14.986	Pos
444	23128966	17602814	14683522	12556647	10482222	9896829	8544213	6843124	6576060	6376457	5945752	5807102	5513558	5299507	4372128	5147908	310.156	14.648	Pos
445	3462365	3821333	4700981	5348296	5353877	5709963	6364746	6685608	5892205	5578993	5721237	5968369	5141403	5797465	5864903	7394722	310.157	13.665	Pos
446	239542	34667	61035	162771	115533		100588	237952		163067		132121		115776			310.287	13.568	Pos
447	290889				324457	296997	351108	327204	388724	409429		510568	501091	393541	421733	380128	310.288	17.19	Pos
448	578874	535628	531807	635915	487709	311620	307163	1127045			443651	187988	1031662	328663	476472	439159	311.319	17.728	Pos
449	593662	746690	730029	728732	1393659	617607		543542		599142			707941	527591			311.355	13.661	Pos
450		734789		602204	1244124			544096	1070402	611106	1053859	650568	718332	529655	752963	614032	311.356	13.59	Pos
451						271132	310629	159217	343956	154331	239219	276732	110926	219256		167138	312.228	12.658	Pos
452	173652		178578	918387	178394	223349			280996	316656	297905	300125	340953	275021	280924	182552	312.23	13.869	Pos
453	323466	305400	285200	263584	262813	254736	256033	220539	221088	196409	185832	192753	167813	184438	180127	182115	317.292	11.954	Pos
454	915326	617898	896612	1384634	847119	402243	471116	1905747	509278	486838	56660	481087	1989743	525022	891619	637802	318.289	16.196	Pos
455			550411												726373	695432	319.249	13.407	Pos
456		353370		455824	360754		387972		418255		458766		419075	721207	492734	381843	320.223	12.323	Pos
457	55163400	79011792	70803928	107371248	55043616	32916310	47145176	166761456	45629656	39874120	58199728	44956796	171167088	40768784	53105872	59605976	320.308	17.641	Pos
458								269390			279533	324476	343407	324708	357643	379857	322.155	13.211	Pos
459	266524	236684	191625	174860	162660	131803											322.158	14.889	Pos
460	1848088	2020637	2070680	2080810	2079609	2104417	2076650	2039729	2075436	2087336	2067807	2004504	1756191	2064737	2071561	1825864	325.371	21.808	Pos
461	14823654	14826013	14821504	15035255	14801141	15503910	14729590	14948600	14552508	14621396	14247191	14591634	14560963	14753892	14303401	14908564	325.371	13.322	Pos
462	182908	198163	153178	160936	155028	139555	161685	175654	135580	158814	164247	149271	151624	161682	147000		326.134	11.243	Pos
463	6804959	6817412	6820403	6801128	6871372	6776112	6588128	6454530	6480313	6670731	6777580	6696706	6364450	6344036	6563438	6713037	326.195	5.913	Pos
464	490331	551963	512635	568821	404518	668481	858252	489937	865712	477133	612365	688514	663126	484124	626296	500373	326.195	21.504	Pos
465				460443	433565		377927	363929	282893	353845	354086	273856		285845			328.145	14.202	Pos
466	578663	503923	539154	461833	456402	405069	372223		399430				174004		198229	194774	328.147	14.207	Pos
467	178823	129258	143503	148844	266570	152054	140585	160231	142913	135034	236080	133001	272698	135640	236838	138998	329.329	13.034	Pos
468	88089	100694	95806	91945	90080	93763	95465	78641	83393	95630	85492	88979	91652	78103	89034	86831	329.33	21.808	Pos
469	1533607	1517639	1599596	1591287	1594355	1551482	1547919	1547529	1560970	1534402	1482213	1498119	1484843	1505888	1341484	1522413	331.324	21.804	Pos
470	24047828	10373324	26749476	12359747	11910044	17187598	12095889	24820544	12532347	22238274	30227016	10508091	14084811	12850516	14387578	12994639	331.325	13.204	Pos
471	2292241	1767818	2192309	2050489	1828800	1397700	1898315	2558964	1693784	1958310	1818214	2039459	2327050	1890499	1673577	1634215	332.291	14.981	Pos
472	131195	131983	126562	136011	129103	117748	126449	136317	133548	141670	123139	125348	128495	142194	133374	129970	333.215	6.899	Pos
473	2915310	1185146	1887880	1547157			479877	3568126	345289	350794		94452	1913687				335.313	14.525	Pos
474	1074611		798075	791248	708249	584748	592629	476048	642136	127284	634716		574778		734529	642418	335.316	15.099	Pos
475	243825	224682	207166	193022	176209		157081	148526	165842	142317							336.209	15.81	Pos
476	162981	155222	221384	186776	159728	260070	305514	194165	198955	378370	386950	283334	251965	298174	270833	289504	336.248	12.415	Pos
477	534123	462455	267588	365833	202594	290371	278206										338.26	14.399	Pos
478	354509	358431	383975	368680	360908	344514	342518	320451	343144	334393	345384	330160	338372	353297	339660	337582	339.252	6.245	Pos
479	1332762	964999	968286	1542511	863320	451705	695264	3070409	547223	605788	1087244	637033	3336119	841859	1069648	947358	339.35	20.234	Pos
480		425394	333472	384800	395061	327640	307083	286550	301017	294761	304591	465971	268138		320259	279647	339.386	13.821	Pos
481	232382	204637	235072	173786	307128	266378	156756	233512	172545	228206	196911	232397	224447	239306			340.15	8.175	Pos
482	702794	685979	702793	674470	703746	701963	685864	728636	671160	700608	662577	668884	674936	716798	647837	709741	340.173	6.029	Pos
483	813083	129592	577272	148485	376355	479649	421514		371135	377388	325782	378750		331463		350009	340.275	14.999	Pos
484	514717	578726	633799	656704	757279	775205	931282	963801	1168994	1153638	1307053	1286042	1308517	1438096	1433663	1510032	342.147	13.795	Pos
485	752716	1013004	1082920	1143790	1149389	1139249	1123866	1112929	1133655	1084756	1112262	1173788	1228108	1232112	1251341	1324862	342.288	21.937	Pos
486	1390433	1368030	1113177	1469733	977604	1082366	1049905	1038517	941217	1152251	954823	1072103	893125	1067691	931301	1108734	342.288	11.899	Pos
487	1613579	1653757	1559460	1566184	1453401	1722404	1844779	1829159	1925154	1911252	1736838	1887894	1776803	1932389	1738707	1766696	346.308	15.729	Pos
488	276866	277427	292499	311836	305754	336576	353735	346006	319670	338807	339736	354790	351208	354069	336451	326014	348.113	13.65	Pos
489								188359	151135	164378	196884		102189	42221	27843	44819	352.143	14.483	Pos
490							183145					312394	143381	238773	134315	141231	352.222	12.414	Pos
491	629225	519063	637401	735221	574623			1617684			658053		1645158		725884	656877	353.329	14.982	Pos
492	1808511	1144380	1070934	1420498	971477		993213	4587656			1218909		4745080	713423	1695222	1052328	353.33	15.22	Pos
493	554192	304648	385765	382623	405658	349434	814788	316012	449418	374613	346366	305073	338865	336794	377964	326235	354.063	14.917	Pos
494	757236	689971	683499	628750	800587	613627	590171	570549	664259	580853	603461	597426	591013	567335	577484	551021	357.359	13.399	Pos
495	175155	186716	178422	221525	194287	182582	196052	190557	197611	189091	173078	186148	185621	185398	169424	171868	357.36	21.873	Pos
496	135924	132200	139689	136401	139688	130219	106138	135273	123363	131691	137707		131681	137412	137460	131912	359.215	5.668	Pos
497	1355650	560087	1194138	554207	543895	852334	655788	1146930	509651	1004597	953751	430415	573457	611673	820815	500469	359.355	13.497	Pos
498	981003	1034420	1115745	1050471		1086989				949489			873640		1027924	875842	360.215	13.95	Pos
499	614656	574458	548533	513791	501412	482899	450854	435693	340822	389772	322013	403973	324819	379808	361232	369831	361.919	21.671	Pos
500	974493	744672		675007	632462	524093	640687	625584	632550	665343	634375	740207	663073	761583	601171	542853	361.92	13.497	Pos
501	5854204	4511252	5107328	5067030	4987796	5229498	5364828	5532025	5225698	5344585	5332117	4703675	5074551	4999606	5383978	5578570	362.302	14.76	Pos
502		133698	144681	134593	169545	152291	141515	126697	141115	153201	162849	147364	165614	155783	137088	158234	364.099	21.755	Pos
503	272866	273369	242337	198892	184415	193055			162695		138277						365.274	15.404	Pos
504	329318	306180	309457	268871	229538	178003		270801	280004	285992	213044			298724	297567	276616	366.166	10.245	Pos
505	791334		3498592	3419275	3249577	3028992	2189478	2716886	1896211	1825019	2182196	2976921	1636086	2180951	1669871	1843116	367.417	13.986	Pos
506			154154	151735	157614	155481	162860	177797	165292	158920	141718	153805	157827	147878	144730	144224	368.376	21.92	Pos
507	833614	604727	701769	3278751	1036091	775797	1089098	837371	565150	14833041	787650	722475	683244	768608	691419	646922	370.093	14.915	Pos
508	8295772	8197458	8399403	8164973	8311736	7908282	8108817	7873100	7981817	7922834	8189580	7990935	7759305	8052455	8248558	8235973	370.221	6.162	Pos
509	287194	320586	328962	307198	361772	367958	397701	409026	426790	442058	461956	459965	442897	464671	454725	451250	370.221	21.516	Pos
510	1870567	1894048	1887359	1954743	1911311	1905994	1954580	1963676	1925632	1878510	2011896	1900443	1953955	1852883	1897516	1901907	370.308	16.492	Pos
511	257213	346428	397816	393903	361571	350600	301925	334541	320308	305535	307990	336041	340978	340538	344727	370772	370.32	22.086	Pos
512						290376	318750	546286	342207	321050	254611	334976		280081	260890	311102	371.357	13.685	Pos
513		151498	150864	1129430	146056	196208		154327	157107	103178	123256	145529	205642	142011	146160	139284	372.092	14.911	Pos
514	3348137	2210301	2715228	3011721	2860623	1660116	2371018	8921747	2108800	2309853	3092840	2261643	8664060	2162602	4306539	3230651	373.295	14.665	Pos
515	563920	595471	587620	562244	607194	485664	520401	705483	666971	731080	581519	765904	563737	757568	574100	695277	374.339	17.115	Pos
516			2658775	2891995	2947452	2247814	2407221		2620165	2430490	2975802	2340452		2443756	2809526	2286294	376.317	14.971	Pos
517			248113	270300	257091	244489	239435	240038	217875	221712		243047	242483		246313	266356	380.244	21.937	Pos
518	343425	328348	350748	343371	330420	344133	363319	353839	356658	314023	346842	339079	355157	363443	356920	358894	382.161	13.037	Pos
519						101553	118734	121083	135836	127025	119270	130777	138699	121055	137728	134475	383.288	11.749	Pos
520	4980975	5013639	5055454	4730652	4679138	4625102	4430497	4194388	4441556	4198127	4008714	4121561	3959727	3921171	3882602	3993189	383.34	15.551	Pos
521	847324	846095	811141	807912	801912	779501	833655	871378	834782	787111	806739	867929	833161	800489	878813	773212	384.2	6.29	Pos
522		5101986	5027243	4866638	4669400	3764375	3471248	4352487	4408773	4087932	3906162	3985507	4079491	3743929	3833684	4041686	385.374	13.737	Pos
523	410486	439874	446264	480406	451797	485566	525231	524155		570544	545191	513160	703324	504801	496549	486479	385.374	21.936	Pos
524			4877238	4773999	4609087	3764375	3438442	4346170	4433481	4247897	4197870	4004811	4109878	4028926	3833325	3924056	385.374	13.736	Pos
525							127721	139377	144529			144763	145806	152330	151229	151236	385.832	22.078	Pos
526	9525847	9253685	8303503	16894732	9436565	9885166	12948790	21112050	10811441	13789996	11562235	19198638	13830569	19928326	13472324	9762572	386.174	12.335	Pos
527	2467987	1769580	2503113	1153503	1731151	1587932	2209772	1604614	1667440	2488489	3339215	2769015	1670145	2185736		1572742	386.184	12.748	Pos
528			755762	721733	766311	640154	642863	629545	586428	663019	601877	629667	624922	665705	599713	574091	387.356	13.505	Pos
529	11816859	11866184	11770930	11303145	10850715	10748207	10306183	10342839	10059192	9879907	10319640	10020029	9813644	9432746	9526406	9587992	390.277	16.328	Pos
530	3365687	2428886	2393516	2724958	2246043	2469569	2436253	3020357	2635162	2525364	2702187	2600533	2819144	2512334	2556732	2538165	390.334	15.714	Pos
531	558853	564806	498805	530274	487447	498236	498175	487378	407804	491996	487053	445564	465445	455220	494924	480686	391.22	12.239	Pos
532	358473	246650	435180	463383	196118		282286	683033	267452	153701	431000	271965	823383		357133	312183	393.322	13.867	Pos
533												672534	1611003	7797766	355353	1614727	396.279	14.334	Pos
534	11242376	13070019	12655012	12430205	12509047	12287640	12229381	11572071	11982968	11477184	11371647	671342	1611003	7770599		1614727	396.283	14.333	Pos
535																179857	397.302	12.412	Pos
536	215228	220027	215838	206896	212126	216455	231733	216143	228874	208666	211798	226817	214116	215222	221465	222699	398.135	13.064	Pos
537	330585	350934	385101	445062	395103	406315	483584	347625	323499	434183	388693	438911	444257	330483	438017	387324	398.245	13.867	Pos
538	312799			394077						252089			178413	270261	200557	280577	398.351	13.43	Pos
539	455421	754837	676091	462135	550152	411810	422128	442331	498227	257197	577378	240501	223483	227417	363752	551232	399.335	13.227	Pos
540	530792	538589	532374	583032	594242	587257	587995	540123	585020	573585	573070	565904	596170	509576	521563	502811	401.351	21.823	Pos
541	3895881	2891635	3345442	2949377	2625726	2588585	2584476	4227682	2770828	2774896	2485844	2598391	2821993	3092073	2487380	2619345	401.351	13.204	Pos
542	6225883	6441469	6205866	6421753	5752708	6505825	6491496	6281883	6051423	6214639	5895168	3001783	2936603	4964270	1386016	3383731	402.221	14.2	Pos
543					243563	265203	264542	207702		229109	254849	288411	263602	366095	287543	439835	402.299	14.852	Pos
544	891318	897422	991745	945952	938620	947530	987200	1033014	1080805	1043007	992981	982178	1056571	1048776	1024783	1017711	402.371	19.194	Pos
545	126002	126921	128655	121295	128351	120175	123617	123683	100489	119382	129990	124786	121026	156852	126056	160064	403.242	5.9	Pos
546	845388	946088	681657		946625	791697		851349		675181			1036290	720445	750366	703044	403.305	15.063	Pos
547					389275	388523	431892	362573	407639	404265	423638	354530	353449	419244	421528	405053	404.256	14.704	Pos
548	3924515	4487101	4609552	4631645	4508637	4579470	4614156	4811160	4667262	4562503	4582482	4538201	4214348	4356707	4420801	3832942	406.329	14.764	Pos
549	777116			626373				980716	291114	425818	655072		1352481	407244	590498	647231	407.303	15.278	Pos
550				114042					106688	104566	112166	109173	104356	107940	114823	108935	408.174	6.162	Pos
551		1370376	1685161	1609267	1697020	1990693	1888165	2015273	1973727	2011075	2191812	1868866	1990804	1798872	1600309		410.3	14.685	Pos
552			136921	156920	201275	252566	290412	302644	266256	302044	308065	306947	302295	310105	313270	313942	413.423	14.068	Pos
553	1126695	1031859	1106542	1007853	942765	871820	757617	560110	637869	541919	530335	586755	513706	469363	492528	468492	414.137	15.451	Pos
554	463894	516451	458281	525721	394052	465837	479099	728260	392614	427143	342686	367854	368248	399157	389847	383511	414.206	12.835	Pos
555	8568658	8392601	8309141	8333821	8209674	8264343	8286082	8075621	8215020	8077410	8101086	8314641	8137229	8135424	8238767	8056460	414.247	6.394	Pos
556	384857	255543	278746	264412	228921	226709	208332	322042	177418	223364	149490	221681	207514	219429	208504	200351	415.366	13.379	Pos
557	744131	807305	840428	790953	861804	877676	1019051	974035	944295	1039672	929936	987424	956178	1055135	984049	987556	418.365	17.101	Pos
558	556379	634396	655081	586129	613119	633783	553489	753746	391001	412151	423139	583107	703875				420.306	14.232	Pos
559		268583	214446						237532	316167	301780	338529	269747	306160	317805	328320	421.298	15.546	Pos
560	777396	683074	488405	584291	706827	627822	572252		747434	784976	1121807	1036343			693929	629534	424.14	12.749	Pos
561	425240	370413	419120	297401	323351	371173	392027	211296		138476		126615			94241		424.149	12.236	Pos
562							381445	686335		440063		572193		642973	388378	294961	426.129	12.334	Pos
563	2017302	828482	1689464	1425425	869248	1343760	1387846	2631742	1232697	1448999	1277473	1312314	1174250	1287978	1135909	1285769	427.366	13.272	Pos
564	171271	192341	188438	178290	195020	196943	190100	191299	191604	177204	173848	190906	186152	170793	185976	169034	427.366	21.839	Pos
565	1150333	1128887	1097769	1118001	1103487	1100523	1107917	1123349	1087276	1082709	1117850	1098635	1112581	1123618	1080960	1108074	428.226	6.528	Pos
566	4843498	2941026	3264988	3104430	2766902	2810962	2600933	4157867	2638365								429.382	13.567	Pos
567	4785192	2943626	3475868	3100981	2860228	2711045	2604276	4105565	2625509	2721657	2620768	2948310	2636884	2912466	2711193	2541639	429.382	13.521	Pos
568		531724	551817	550951	668885	636847	614963	584494	663300	601128	603082	619969	625873	683989	584843	613824	429.382	21.892	Pos
569	668892	843355	762575	898286	1170069	958263	1008229	826386	1400248	1462037	892316	949773	929870	935087	928898	932263	429.907	13.496	Pos
570	1345299	1235762	1136630	1067659	1053939	1006915	969117	867198	892514	873892	776554	829631	915742	815392	772628	737166	429.907	21.67	Pos
571	5585930	5305565	5686048	4975071	5166979	5322377	4317783	3867423	4978242	4420310	4069009	4349782	2452653	4222599	3530284	3822160	430.172	17.612	Pos
572	4279688	2166338	2714517	2702371	2706572	2900768	3233006	3152249	3036117	3035924	3045984	3047526	2951807	2898396	2920666	3300954	434.359	15.731	Pos
573	403805	351407	369036	357324	366262	368973	360077	253415	366408	354832	351299	322132	377107	354821	342803	313214	435.247	12.203	Pos
574							93155		106952	69722	66261	66311	92416	83493		78058	436.231	21.525	Pos
575	408384	330281	336458	277415	338255	274580	289807	317964	258109	203173		279119	63631				437.333	14.223	Pos
576	1706561	1293036		1533208	1398815	1359734	1357160	1320010	1239672	1067713	1098442	1291939	1238497		1065906	1068896	437.371	15.002	Pos
577								29428992			29160172	2513112	4629578	21715512	1213055	4522884	440.306	14.334	Pos
578	32390272	32980816	32642660	32720808	32328200	32190050	32077624	26843528	28983472	29773044	27001264	13089116	4212492	18907446	1114995		440.309	14.333	Pos
579			182647	206329		201866	225285	237567		249267	298474	282254	223894	244621	283327	308723	441.392	15.564	Pos
580	15374931	17474668	18796476	20197374	20936796	22796680	24352736	25421854	23039700	26823456	27529072	27725738	25093932	28064272	30463364	31026028	446.324	14.794	Pos
581	1829273	1833218	1599077	1883033	1725158	1854480	1870671	1950019	1840262	1792103	1851852	1859862	1821759	1830097	1784258	1775874	446.397	19.207	Pos
582	133080	134392	129061	123352	117200	129815	124860	132889	127218	133275	136311	123623	130602	120641	130310	117621	447.268	6.136	Pos
583						4604060	4598314				5880052	4409054	5469096	5504778	5976777	5029450	450.355	14.75	Pos
584	206305	192753	205838	202432	187431	206394	227839	213035	209886				246295	258426	255056	237114	452.336	21.644	Pos
585	127456	222613	161373	198952	213261	188536	163115	194403	197760	182648	140228	199171	186921	96265	228366	220031	452.336	6.816	Pos
586	3525753	4284690	3404668	3298956	3469827	3525568	3579439	4071428	3953663	3574437	3462960	4137233	3959637	3580416	3590311	3462912	452.336	7.112	Pos
587	472709	401721	409625	414126	465489	349883	329908	433198	396348	419514	331591	384203	367052	363306	419470	387548	454.328	15.876	Pos
588	919711	862612	656492	765648	708204	607768	757516	713526	738941	736603	632160	710522	709560	615114	500991	689375	457.816	14.083	Pos
589	7969485	7320973	7784493	7514562	7515536	7379517	7513983	7409091	7244174	7271047	7466524	7376715	7428481	7454230	7403221	7328252	458.273	6.603	Pos
590			234668	250653	231093	232694	263734	288583	295443	281783	310398	292767	300717	286447	304756	287454	458.275	21.539	Pos
591					88630		87144	87266	84412	87482	89930		93014	91768	100797	90476	459.232	6.664	Pos
592	632016	753366	707394	784387	738051	729909	969057	667376	1032267	791845	814032	711553	852020	788008	829910	824087	462.391	17.119	Pos
593	63794280	64231528	60716452	61844016	59315664	59950904	56811052	54828256	55103844	52893580	52641100	52464736	52200488	51934604	54964720	50196516	463.351	14.795	Pos
594	6738857	5178544	5434127	5522054	5369782	3977115	5800907	6344425	4960026	5250019	2309826	3094304	4670531	2158569	4143706	3962098	467.383	14.749	Pos
595	576376	531840	584715	551070	517583	512983	482623	508290	453627	515125	454627	469750	485413	460753	460488	439290	469.413	18.372	Pos
596	1132575	1060889	1037184	1031525	961372	996933	998314	1013709	992871	955129	955109	1014672	1006406	1003268	993915	1008019	472.252	6.742	Pos
597	184560	231475	234378	236284	208003	227091	207704	203817		216218							476.273	14.204	Pos
598	666641	534871	609930	486848	516297	493420	595889	362728	484378	569905	558435	371033			127548		481.357	14.196	Pos
599	1900823	1415851	1574729	2008789	1500017	1632347	1560917	1559360	1544367	1412781	1541281	1571958	1531009		1528379	1497169	481.397	14.997	Pos
600	732371	828519	1037143	1104166	1112138	1087141	1152587	1167482	1170131	1175781	1307449	1090822	1299443	1156565	1127337	1200097	484.28	14.79	Pos
601							59364676	58472216	58365796	58078560	56037604	4414006	8184034	39734184	2677295	8032474	484.334	14.332	Pos
602					59158200	59861880	59790656	59244448	59077728	54083300	56358904	27346892	8193190	40148548	2195100	8043481	484.336	14.329	Pos
603							143997	135473	146402	144706	153717	150944	152994	146979	139563	146592	486.284	14.785	Pos
604	1189580	1216149	1189493	1248084	1215345	1198974	1235022	1288152	1340289	1240032	1337175	1289547	1241779	1254936	1241034	1223472	490.424	19.198	Pos
605	115086	106891	102639	105197	110112	102990		108264	103771	108671		108468		110461	111356	100952	491.295	6.346	Pos
606	1606369	1678395	1708753	1589071	1428927	1484079	1323860	1261106	1313259	1242564	1156833	1136631	1014943	1113916	1022449	1008389	492.274	12.982	Pos
607										156553	185482	169469	140390	211400	163642	195538	493.804	14.199	Pos
608								200377	221008	209148	303498	299663	265477	133819	287603	309804	493.805	22.074	Pos
609								61118	72361	73559	72251	67754	78362	68968	83514	93498	493.806	21.554	Pos
610	2926179	2153784	2040736	2202419	2105221	2320293	2301696	2353414	2135212	2238979	2158085	2150932	2161294	2056806	2073356	2044789	495.413	15.729	Pos
611	860786	938684	916165	956885	569472	398915	593556	560916	583435	544957	920712	550192	587944	594710	546556	494208	497.894	13.407	Pos
612	963066	877605	785906	762890	715464	719593	644570	605710	514782	562421	544562	562862	509124	540735	435880	497222	497.894	21.671	Pos
613		3098496	3197774	3215032	3456523	3503382	3695592	3242193	3463196	3408514	3265860	2579951	2911519	2347307	2263559	2094935	498.355	14.555	Pos
614	338935	342039	383973	398978	386100	384582	409539	417021	417060	424652	409579	414595	410886	402454	402963	395038	500.132	12.049	Pos
615		53966836	52376584	52503384	50725148	49478492	48099440	46702032	45245808	40200188	43054896	1189154	5942880	29895278	14681044	5787180	501.363	14.333	Pos
616	986404	1004369	990368	948208	924553	894872	1079873	876253	917935	965197	839338	956572	873653	925451	907005	865058	501.842	14.051	Pos
617	6815971	6688018	6410231	6292362	6068007	5930099	5695921	6248078	5900558	5853456	5601931	5782499	5795783	5544488	5837992	5815103	502.3	6.796	Pos
618	115453	115634	107124	103757	104861	100424	107404	114794	97957	97154	99518	101021	103964	101847	104977	107905	503.258	6.891	Pos
619	296203		133749			173159			126972	137971	113985		120776				504.2	9.221	Pos
620							582628	636680		743136	796135	749533	619406	812453	800706	797918	504.378	14.794	Pos
621						8467878	9979316	10158004	9597499	11401246	11904129	360414	1891999	8202688	3033958	1913067	506.318	14.346	Pos
622			739636		682749	694936	634429	560837	591646	574451	568243	545043	511305		501262	539205	506.354	16.408	Pos
623	309444	215078	249328	231437		150647	152374	183166			129603			129925	139884		508.268	12.144	Pos
624	3981095	4524004	4940591	4980099	4873980	4957274	4423696	5502816	4973432	4947410	4956080	3824575	4695531	4445551	4093628	4214164	511.407	14.736	Pos
625	862000	938583	895750	863616	858495	776434	772769	752293	712255	692109				643632			514.256	12.983	Pos
626	839094	816754	838147	787185	775051	750138	758967	745460	759030	712380	707904	739234	732439	717370	747513	763902	516.278	6.942	Pos
627	2676917	2578749	2777743	2360703	2654600	2730333	2448985	2678931	2555414	2558638	2556954	2457213	2480106	2230793	2436197	2597332	518.131	20.822	Pos
628	478429	484025			495631	137027	463992	491458	446201		440457	428031	472119			443679	519.325	7.274	Pos
629	153679	173408	171650	172864	168541	194411	205900	213748	218034	196691	230928	233084	229211	220275	228009	207599	519.326	21.554	Pos
630									66781	66708	71869	68648		72685	71320	79307	520.765	21.579	Pos
631	446490	423103	421785	389494	449667	363290	355283	415857	380084	386116	409185	443488	420606	415975	425984	359126	523.445	17.144	Pos
632					68852		68697	70499	81086	76770		82270	82497	89046	85422	80887	524.283	21.545	Pos
633	2450841							1706705	1877967	1637368		1603472	1807441	1836871	1645507	1426653	525.422	14.983	Pos
634	343218	176456	250615	278728		201676		366001	421912		434767	403911	316548	268631	277136	288039	527.403	13.862	Pos
635								10041670	11691262	12202518	11689324	343098	1874236	8627714	498453	1889661	528.36	14.325	Pos
636				8071965	9540081	10354171	11128537	10041670	11495689	11989537	12180906	5948521	1874236	8581574	498453	1889661	528.363	14.318	Pos
637	228391	184837	161559	187893	206789	152704	164224	148882	181337	185634	145066	135849	127727	153017	163641	156515	530.231	12.975	Pos
638	1002263	930128	982311	1123775	912503	953774	1174543	1006618	973259	929203	938626	1020445	884415	971077	939669	813872	530.398	20.754	Pos
639		517737						389814	461063	629688	473672	621137	513119		580079		531.375	14.002	Pos
640	283951	281690	273018		261018	273653	270047	271396	252267	249340	310046	236573	250034	198439	229662	217070	532.273	14.898	Pos
641						128405	292799	133091	153974	142902	164233	152122	153780	154745	146828	159303	536.151	14.928	Pos
642			34905820	39022544	27703948	32877462	16844136			31962224	21467788	23524136	17323592	19002276	19607620		536.528	21.164	Pos
643	779701	820568	853484	837201	787780	861836	814213	719036	800147	816977	754773	699693	778404	705528	775271	700540	537.157	20.812	Pos
644	196475	234871		251956	204972	226063	211862	220800	203494	204138		206923		184683	195484	204451	537.423	15.863	Pos
645						187180		604812	320271	402964	290926	380611	375128	198167	281120	291420	539.421	13.502	Pos
646	3009478	1859241	2131147	2070427	2252454	2317388	2337720	2341386	2272561	2316369	2347730	2274738	2084749	2224764	2160569	2161303	539.44	15.715	Pos
647							72230616	70156352	69350800	66983024	65019816	35282624	9533038	49008440	18820768	18055454	545.39	14.314	Pos
648		78345472	77130680	76349504	75015800	74424528	73300464	70628328	69552008	67258728	64241568	33396924	9533038	49273756	2723337	18055454	545.392	14.315	Pos
649	368684	368355	352667	338686	294332	359958	325442	334152	367897	322823	376567	321853	323141	309937	343939	317824	545.869	14.045	Pos
650	3046972	3448035	3675161	3728021	3824367	3888340	4152872	4189168	4233490	3986995	3998610	4089122	3911970	4271497	4243380	4224144	546.326	6.977	Pos
651	103988	97030	106572	96453	101560	100625	99980	99417	99727	95164	96255	97979	99565	107309	105069	100991	547.285	7.078	Pos
652												5426004	1547480	6791963	521957	1572323	550.344	14.319	Pos
653			5274993	6238682	7075699	7496794	8542530	8933159	9059313	9771588	9922387	5424742	1549261	7141177	436743	1573071	550.348	14.32	Pos
654	620198	723961	657819	611735	609077	565238	476172	515848	489799	510901	484695	456544	444187	443722	429909	426869	551.189	17.296	Pos
655			253563		207500	211511	199792	214229	213872	173830	208739	207868	181491	186106	192953	185913	551.398	14.675	Pos
656	840029	844021	847953	870325	887361	839133	836221	886694	795036	837681	542522	827012	836473	806592	798571	800037	551.476	19.176	Pos
657	576109	487423	535204	507299	528880	499949	468619	490744	484539	446367	461983	447660	413993	477182	419783	441819	553.169	14.913	Pos
658	3685357	4066319	3863113	3756847	3962354	4278023	4278744	4771014	4266935	3584633	3870739	4003652	3914208	3818162	3932249	3789831	555.434	14.728	Pos
659				225193	172809	240965	228674	441321		432277	438014	306031	325161	227333	766733	321339	558.51	14.067	Pos
660	4312912	4048728	4087239	4273672	4127327	4090242		3940248	4014263	3852827	3801030	3026675	2847044				559.405	14.541	Pos
661	210176	201341	222209	250111	253099	237884	267609	269268	260502	247255	306061	327974	286918	300473	276937	286257	563.351	21.572	Pos
662						134307	241552	130653	293314	204331		350508	1171915	108969	923143	308497	564.559	14.106	Pos
663					371008	784664	757810	457271	514704	485217	710388	703307	469757	471768	524720	458201	565.881	13.451	Pos
664	892704	799346	733400	686354	657818	614310	627545	574559	554921	534886	508147	539861	524601	496809	470302	456061	565.882	21.685	Pos
665					172436	156285	143374	353279	278093	241001	259892	246943	225491	178966	177325	193256	567.451	13.877	Pos
666	611384	617253	549024	572495	523389	535385	586196	741216	602172	531058	543626	571123	591733	546775	560945	627206	567.471	17.11	Pos
667	1489381			1716035	1761370		1604365			1748258	1791230		1574932	1507942	1432801	1904594	569.448	14.981	Pos
668	360830	325607	313317	306954	219719		256339	333589	313649	341957	294667	259101	307436	260189	278862	163123	571.431	13.844	Pos
669	254038	308306	275842	260748	215534	269899	215571	249507	227311	313607	301538	225499	240385	275409	267980	187929	571.444	13.345	Pos
670	99904520	102275296	102375304	97577720	101789496	99243672	100016208	98027072	91527032	94890936	93738224	54970392	29803506	71563696	29454612	37138348	572.39	14.295	Pos
671	98642464	102377832	102492336	97650280	101166832	101862256	100115728	98121824	91534336	94890936	94147056	55155568	29808838	71122912	3412959	29582108	572.393	14.295	Pos
672		538629			1077006	636588	574301	680802	918048	743062	642634	657248		609433		485008	575.402	13.996	Pos
673	204053	237068	262280	291090	287185	298241	330485	314735	330334	330513	306215	353056	354559	341023	349881	385417	577.331	7.115	Pos
674	381810	219278	334395	179146	170266	138877	125329	199679	142849	132939	151957	101764	105921		18822		580.232	14.478	Pos
675	241762		248059	256870		256077	240569	262796	229718			248898	240406	250137	251106	246142	581.451	15.859	Pos
676	2713676	1896833	1563465	1597684	1804886	1804349	1855654	1978013	1858190	1906369	1820734	1856051	1757422	1833414	1822209	1765304	583.467	15.711	Pos
677																	585.44	14.224	Pos
678	517464	649807	776195	857043	939222	996636	1259505	1363173	1480717	1491068	1561470	1619957	1741779	1799725	1908439	2070175	590.351	7.143	Pos
679	24026768	23888728	22549272	23436100	23239588	22448928	22539548	20315684	21029988	21119916	19649556	4433601	6104828	15934616	332354	6723300	590.42	14.296	Pos
680															83792	85678	591.311	7.252	Pos
681	173774	259420	225380	215247	255739	175050	235008	324097	262484	244896		230901		306364	254287	241458	591.534	14.056	Pos
682							7169492	7877247	8094220	8951937	9173968	1651551	1398607	6983905	399597	1415295	594.37	14.314	Pos
683	142853	174764	78510	81548	83078	140349	66536	187362	153973	140904	173475	68593	99659	98786		63385	598.388	6.145	Pos
684	3380533	2657895	3127181	3498774	3337332	3174583	3507373	3645760	3546266	3584490	3590505	3226825	3224892	2864794	3132520	3216889	599.46	14.71	Pos
685	1070599	1012023	1027363	1029230	1022880	1117322	1045382	1124087	1091956	1075587	1041258	1056627	1025675	1051574	995460	1045578	600.346	15.292	Pos
686	4771978	5427820	4990280	5013406	4803724	4890372	4768920	4809895	4846526	4553162	4589347	518480	3186342	2969803	2407575	2383614	603.432	14.532	Pos
687	204863	239762	229102	244395	250316	256187	274242	287119	264564	309526	314868	295060	308245	319078	315621	322122	607.379	21.586	Pos
688		251103	335105	305506	413857	414839	516084	414655	437634	498956	587259	370946	438790	480809	409557	404318	608.388	14.559	Pos
689	248125	278795	207686	282466	264014	161751			228238	211200	257337	195969	308104	151801	288536	204069	611.422	14.682	Pos
690		576347	593758	515496	514131	507447		596982	545908	531089	528133	526415	543581	510990	542053	506540	611.497	17.093	Pos
691	343092	245038	271471	302159	254335	372526	280472	282186		360483	399069	277375	299375	298861	324898	269566	615.456	13.821	Pos
692	4912307	6011753	6669034	7184750	7585970	8165464	9125951	8906322	9080513	10141682	10409374	5989385	2677842	7486761	3596918	3147205	616.417	14.287	Pos
693	4959922	6091679	6683186	7154959	7578963	8206662	9174849	8915774	9199095	10141682	10409374	5989385	2952172	7482460	426217	3147205	616.418	14.29	Pos
694								1186964	1055168	1090180	939142	970215	784891	789569	881385		618.303	17.156	Pos
695			657058			656814	649925	691051	712035	860371	584149	657281	630131	676098	642472	640365	619.429	13.963	Pos
696									81413	87590		92758	98068	108666	116266	123136	621.357	7.282	Pos
697	379383	441865	367529	428464	432224	495832	492534	568495	540060	572032	546807	574262	597275	583758	591644	569467	622.327	15.241	Pos
698	1551914	1540948	1496832	1457962	1378365	1315567	1291254	1275776	1211661	1196956	1155473	1148730	1079676	1073355	1052483	1038002	625.208	19.221	Pos
699	245389		262823	313350	311518	269126	290482	254407	275147	260478	253810	259298	274958	278097		274960	625.476	15.846	Pos
700	871844	806249	884125	815016	827731	870570	809326	789417	736838	768143	742963	767798	709204	722829	693676	810746	627.188	15.595	Pos
701	2129465	1312037	1524115	1614164	1540524	1675280	1395729	1833566	1662453	1633618	1617515	1505700	1581740	1574102	1450080	1467526	627.494	15.687	Pos
702		102231632	97452184	97049360	97383680	97662096	95351648	91178776	90241040	86570272	88900688	56162856	33591096	69499312	33587020		633.441	14.272	Pos
703	99281424	102281520	97452184	97049360	97383680	97662096	95197232	91178776	90241040	86570272	88900688	56162856	33591096	69499312	33587020	41030016	633.446	14.274	Pos
704	909802	840979	777082	700881	663726	635728	590462	552073	530760	516007	493373	510071	502975	493601	482847	461301	633.869	21.687	Pos
705	17301924	9810579	15130719	8231838	7911007	6736883	6402541	9780442	7059002	7139524	7982155	5654251			3773997	1781542	636.293	14.456	Pos
706	17897600	10236190	15247572	8572646	7804490	6892817	6674331	9702579	7283336	7402983	8102623	5782721	5775186	3451932	4200864		636.293	14.453	Pos
707	368001	297738	325872	224037	250688	209568	400324	283250	152728	254283	301023	314806	243972	199395	249771	198482	636.299	15.294	Pos
708							318571	343504	310401	301070	308063	291406	313676	296811	308121	270622	639.45	14.586	Pos
709		292054	394214	340222	337595	299176	317042	340060	268647	301039	308315	292111	314755	294084	292579	266367	639.452	14.584	Pos
710	2315312																639.58	19.556	Pos
711	2435354	2498988	2785712	2915477	2721980	2768941	2752179	3226746	2693941	2793517	2804681	1866139	2458391	2288658	2017705	2205670	643.486	14.682	Pos
712							563668	461852	452173								646.334	18.099	Pos
713						625183											646.335	17.373	Pos
714	5396490	5088282	5059703	5252259	5189700	4960360	4995086	4533901	4975195	4722489	4699289	3377241	2953200	2919353	1816353	2248005	647.459	14.517	Pos
715			109558	94080	94915	113346	125167	139610	145006	159697	170918	172538	185796	206879	223843	223846	651.404	7.29	Pos
716	296775	307334	272917	333620	313833	303616	343842	344540	335206	346970	362855	351109	331240	351917	364921	374915	651.404	21.606	Pos
717	420467	420031	400366	378071	406869	404782	424627	389960	388427	392751	248837	297487	397927	252260	256566	398990	653.508	17.177	Pos
718				391711	343080	405072	400828	377812	399346	393430	388877	383853	400174	375500	373205	375025	654.298	14.85	Pos
719	557946	1120082									1450531		208066	1081074	108227	216730	654.371	14.349	Pos
720	319739	345804	574409	364535	468412	318459		395528	370368	298684	217076		302839		269453	343751	655.449	14.666	Pos
721			422188	450032	432196	426553	428877	461875	445642	437616	381483	452467	449438	383886	430986	426721	655.523	17.084	Pos
722			567323	522129	596142		659602	610847			624201	385832	427940	202112	355000	441291	657.466	14.149	Pos
723	1592977		1300760									1389427	1302219	1430859	1312242	1318586	657.5	14.941	Pos
724	3364378	4975592	4661399	6003074	5687389	6719443	7512206	7870955	8134087	8390922	8609402	5440993	2687832	6466607	3350038	3507453	660.445	14.266	Pos
725	526928	541986		551577	554063	534152	525507	548217	560312	530447	541247	510179	561906	505854	465431	503518	660.459	18.247	Pos
726									683639	697198	620155	529732	637148				662.329	17.18	Pos
727											614396	714990	601387	701130	719162	703738	662.33	17.326	Pos
728		25489686	25361694	25192512	28167418	5473784	28639816	23510624	29458432	26824910	21234362	25232720	24366772	23827264	21501912	23057700	662.447	20.014	Pos
729	455730	338592	470171	511338	480333	373161	567872	361333	383714	726966	543364	865869	783659	533153	548491	841881	663.455	13.941	Pos
730	353222		116175		123459		231604	834768	607450	265847	268341	693288	568429	464726	569454	341175	668.325	14.74	Pos
731	297437	264415	271697	278659	275819	309207	311159	324966	310965	281459	265876	286991	309261	278451	308941	294540	669.504	15.846	Pos
732	1740200	1029394	1243004	1299289	1295441	1321414	1279604	1309589	1193597	1271055		1190063	1110996	1192721	1149988	1114324	671.52	15.628	Pos
733	211640	307687	370323	342879	384531	465925	429894	388437	405924	474503	515289	331426	339474	281726	48158	228283	674.461	14.52	Pos
734	521027	619242	532733	1003867	604770		358722	2050103	345479	294353	541870	363485	2036394	311636	644354	544255	674.669	17.657	Pos
735	97170672	96822072	95344264	91894992	92351944	85812296	89645904	88699384	87445040	86288208	84972040	26755456	36936544	67709504	37066956	36777416	677.472	14.25	Pos
736	1873411	1968742	2164539	2287285	2186779	2170376	2117040	2582189	2230590	2236678	2133191	1402130	1810029	1636935	1394488	2130203	687.512	14.666	Pos
737	4949738	4717363	4759516	4707910	4717361	4636756	4560605	4289506	4414665	4036294	4268404	2790247	2644445	1383508	348604	1704449	691.484	14.496	Pos
738	4875713	4664972	4724163	4713146	4625987	4583336	4611599	4344565	4415561	4220818	4245243	157876	2638139	1384099	328304	992500	691.485	14.483	Pos
739	286549	261064	299753	257443	287072	270605	291661	286994	311990	358014	288091	370905	324330	303820	313099	324027	695.432	21.628	Pos
740			511661				1594200	737980	1573234	360609	746880	415700	133010		172463	313363	695.641	14.118	Pos
741		552262	531095	444166	439975	433365	1274337	700803		372223			623225				699.227	14.878	Pos
742	411385	419272	403796	400550			374645	444564	411325	395487	395084	385448	367477	391308	385584	335142	699.55	17.068	Pos
743	4106292	610537	653301	555482	565572	566844	723972	604975	600543	666205	522616	568733	471722	540373		529051	700.403	19.994	Pos
744	818830	769974	816125	777696	806726	841436	772839	749339	749319	691744	774267	725920	641894	674484	704089	773476	701.206	16.552	Pos
745				1038716		1211000	1067183	1233142	1178320	974250	971877	963951	1033347	987786	1332773	1065139	701.528	14.932	Pos
746	829501	737137	706198	640709	581934	569494	522522	503106	492426	464254	450754	462823	457928	439331	413471	428594	701.856	21.693	Pos
747																2030595	702.567	13.812	Pos
748																2080708	702.567	21.88	Pos
749	2137942	3851176	4529047	4773503	5212048	5599145	6375209	6573955	6280574	7063104	7123906	4166598	2817052	5559487	2445174	3294318	704.47	14.256	Pos
750	578148	477038	634523		585934	576321	663203	682873	494582	990694	500036	666536	553640	512192	569502	563012	707.482	13.915	Pos
751	279392	304070	289229	289307	315175	311644	296707	283877	284088			295704			261242	246294	713.53	15.814	Pos
752	1272157	738173	957317	974868	837221	835874	1052288	1026317	909262	971272	944237	938014	862388	953887	793414	821966	715.548	15.66	Pos
753	80785936	81494208	79988512	79760016	76651904	74594464	75678560	74914624	72636072	71578384	65675988	48817176	34671856	56912892	32654544	34719940	721.496	14.23	Pos
754	20954618	22190388	21276960	21840648	21526208	21159490	21049192	20678060	19466704	19598436	19802080	12645683	9659081		2347484	11483127	722.5	14.226	Pos
755	1302303	1399387	1552567	1634219	1534022	1536653	1527378	1739596	1490352	1511797	1570068	1052290	1232326	1044794	1057252	1132794	731.538	14.646	Pos
756	4095927	4026727	3986368	3919209	3836223	3894794	3842431	3680274	3578449	3482960	3580232	250793	1956643	1259814	243219	863329	735.511	14.48	Pos
757	194538			174374	178482	155689	245647	219626	242362		182569	173910	201942	256706	180056	212206	739.458	21.645	Pos
758	664383	832759	974173	1048385	1142693	1158501	1264920	892363	876569	1200117	1276381	709259	380826	859605	37427	482024	742.427	14.303	Pos
759	416274	283753	327196	164275	171109	128079		172800	116502	120859	137966						743.256	14.489	Pos
760																	745.511	14.115	Pos
761	2038813	2959594	3124122	3682769	3701286	4285814	3831348	4795757	5158309	5055508	5110255	3195596	2277796	3917077	2318600	2433384	748.497	14.239	Pos
762	281586	264668	255571	267240	280539	270887	267637	237818			283718	277385	294300	248854	258540	275316	757.556	15.801	Pos
763	875164	544178	584210	711067	564864	590933	614588	735643	580846	684810	587933	536086	610478	638014	982529	524924	759.573	15.647	Pos
764			239427	168094	194634	199590	240217	389740	318273	345431	416682	241077	121221	101603	79378	98954	765.278	14.482	Pos
765	60904516	59525524	60519664	59925764	57793656	57531776	56293916	55473568	51666248	52558528	51894708	36539944	29007760	43291220	28032080	28760804	765.523	14.2	Pos
766	208830	258410	300990	209595	114585	119900	241545	364884	261212	161691	168394	267298	273780	135998	123970	306880	767.53	5.501	Pos
767	224652	278338	321477	224825	129818	272594	271953	194100	281900	164202	320945	247898	291596	293764	134083	325628	767.531	5.501	Pos
768	753029	699717	629144	602090	564669	529733	489508	467878	453555	404679	414949	417725	411136	386135	384368	387998	769.844	21.687	Pos
769	640773	607006	718823	642200	671425	713447	627060	620667	675506	594277	645769	653308	583599	601276	579315	674831	775.225	17.977	Pos
770	1010325	973023	1057043	1154639	868668	1039514	994955	1172641	1005849	832025	965913	587105	824554	690825	834735	645771	775.563	14.632	Pos
771			1058711		868668		990858							941954	817512		775.567	14.631	Pos
772		3167281	3095890	2962916	2893470	2952965	2882085	2656201	2674465	2628975	2571010	735033	638123	1047730	129365	813219	779.538	14.476	Pos
773		3151641	3057076	2950947	2927578	2784261	2876439	2622899	2656988	2715792	2600008	659446	638123	942969	132710	540556	779.539	14.465	Pos
774	87316	87890	95666	97884	89774	95333	101704	102885	99222	99138	109101			100277	115464		783.484	21.67	Pos
775	572894	541127	750864	846926	852650	752388	960133	1029539	612593	952091	1032975	565948	111774	623662	23299	111821	786.452	14.298	Pos
776		517238								531471	520949				430842		789.58	14.869	Pos
777	238841	257448	272467	287430	240719	262925	263648	253360	261221	251183	242732	14485	96446	131024	49156	83206	790.369	14.432	Pos
778	1578693	1956473	1752088	2587052	2567400	2967230	2815876	3527718	3670450	3521027	3402240	2646655	1838629	3073640	1545541	1797155	792.524	14.211	Pos
779	310499	254825	283902	279032	319195	302769	264660	262187	250290	344635	395840	259744	248040	303259	284980	293328	795.534	13.864	Pos
780	2474098	2034355	1633702	1837451	1256406	1466759	1097862	2283923	1178334	1038001	986647	923808	1127553	950695	896649	909830	800.545	16.57	Pos
781	267862	252289	360805	186603	237860	262299	230146	201258	210706	252194	180763	236216	218749	196940	212980	204560	801.581	15.779	Pos
782	529879	342844	377864	460817	439768	414945	412316	433873	341852	435768	457634	355600	440355	434788	348325	352110	803.6	15.632	Pos
783	666314	712013	640423	643356	637816	693714	744791	710146	701090	659947	720936	709119	722903	695097	691606	624888	803.611	18.524	Pos
784	41712008	40572412	41248552	40743112	39088588	39283612	37656504	37422372	37442860	36056384	35853800	24960508	21770512	29756944	19932896	21057504	809.551	14.182	Pos
785	643334		709546	735021		722833	665635	734116	595106	633478	515863	493444	517759	540142	342663	373164	819.59	14.599	Pos
786	2825814	2306827	1941196	2095189	1551146	1571648	1431255	2609875	1582855	1399989	1393277	1303176	1504754	1308193	1298225	1276442	821.474	16.562	Pos
787							1875412					796390	449369	752931	590253	556274	823.563	14.475	Pos
788	2080169	2072775	2020518	1986360	1932410	1927371	1815833	1834652	1870602	1698682	1809502	800838	443899	782594	116599	444583	823.564	14.453	Pos
789													262877	243409	480226	226686	826.189	14.462	Pos
790		499108	789499	528182	552288	542748	624210	922660	716939	738212	844560	66663	262877	243409	177915	238552	826.192	14.449	Pos
791	355543	476293	531937	567399	621700	456119	527294	674272	678576	581560	704926	411001	238850	501998	298504	321167	830.479	14.266	Pos
792	755958	669871	615708	571003	528541	509250	468898	444471	412045	409069	381579	387772	394593	367862	360461	359741	837.831	21.698	Pos
793	470230		522692	482718	508209	590955	469901	399994	482305	459866	537348	656867	464532	459207	479739	416800	849.245	20.189	Pos
794	27342884	27264422	26515526	26095302	25766228	25061216	24427532	23762736	22308160	23163356	22687174	16468624	14922677	19145568	14006838	14968608	853.577	14.162	Pos
795	839493	1178364	1280518	1262682	1459030	1625946	1978645	1715684	1888454	2210100	2216115	1392323	1120628	1820637	1035139	1383920	858.531	14.199	Pos
796							354027		458987		368600	285194	261447		230714	221404	863.615	14.56	Pos
797	1361111	1339676	1299397	1284805	1244336	1242898	1181595	1157542	1118803	1095897	1095092	38419	291657	544660	83613	295534	867.591	14.437	Pos
798	1344547	1312080	1329627	1121249	1242251	1207720	1246850	1141417	1130642	1073272	1093724	39585	293208	522390	110214	243104	867.591	14.45	Pos
799	196115	295702	291776	295528	314954	448799	272099	403263	274228	320796	374446	274425	199926	339746	210500	160137	874.506	14.246	Pos
800	13605545	13769508	12902961	12538913	13445330	13303969	12914874	11881172	12361868	12047185	11287682	9221609	8530960	10434066	7706778	9891393	897.603	14.141	Pos
801	6094147	4498638	5391814	5278382	5064126	4881153	4713111	4423489	3495279	3544703	3379802	3320402	3182587	3456831	2831394	3227840	941.626	14.067	Pos
802	326384	437644	384516	400575	360544	402664	409340	334558	403750	377526	352857	345901		365492	312022	383985	985.656	14.077	Pos
803	559390					328347	389047	364205	423557	426981	396731	457735	445525	383065	457321		1000.74	15.729	Pos
804	648240	558593	558358	606815	540475	614074			528346	487506		555280		567364			1029.68	14.186	Pos
805	2346661	2279068	2284221	2232378	2086396	2121732	2014536	1975509	1848311	1818034	1848520	1477519	1603345	1712137	1402156	1713290	1046.71	14.067	Pos
806	442969	484665	500552	474464	475035	481668	713202	534901	453841	477921	492163	594081	441903	499611	445404	579798	1134.76	14.019	Pos
