# Supplementary material for: Pathogenic NLRP3 mutants form constitutively active inflammasomes resulting in immune-metabolic limitation of IL-1β production
Source: Nat Commun. 2024 Feb 6;15:1096. doi: 10.1038/s41467-024-44990-0 (PMC10847128; doi:10.1038/s41467-024-44990-0)
Supplement: Supplementary file 5 — Supplementary Data 2 [file 41467_2024_44990_MOESM5_ESM.xlsx]

## Sheet: total
Supplementary Data 2. Comopunds identified in the metabolomic analysis of immortalized macrophages
Compound	Empty Vector	Empty Vector	Empty Vector	Empty Vector LPS	Empty Vector LPS	Empty Vector LPS	NLRP3 p.D303N	NLRP3 p.D303N	NLRP3 p.D303N	NLRP3 p.D303N LPS	NLRP3 p.D303N LPS	NLRP3 p.D303N LPS	Mass	Retention Time
1	20953798	21048616	21763668	21490944	21649746	21218968	20814778	19907284	19959946	19095984	19273878	20976246	195.089	12.934	neg
2	7960403	7613941	8573462	6109270	6557956	7435732	11697255	12314977	10915702	10580648	10544662	8490032	307.084	2.369	neg
3	4529060	4307033	4876850	3529484	3736478	4283488	6682102	7016418	6418602	6363058	6334831	4956467	329.066	2.383	neg
4	637731	8645565	9308033		10294306	10333868	804208		8174583	8014590	7725584		789.551	12.66	neg
5	3238278	3063418	4220027	4338028	4156311	4192453	3770085	4052996	3485607	3937984	3298280	4458655	266.155	15.066	neg
6	1802884	4174621	1914930	2994349	2405542	861300	2158064	1606177	1664654	1443450	884129	2787855	136.978	22.585	neg
7	1964608	1990409	2300603	1619661	1783024	2045025	2818859	3331050	3131518	3056670	2942158	2385011	351.047	2.387	neg
8	1103923	1211204	1098131		793478		805754		939576	958903	713314		458.232	16.35	neg
9	1294878	1586258	1672749	1480913	1330009	1447535	2202429	2501059	1585349	2098580	1428519		382.181	15.802	neg
10	948090	735102	1738069	1664131	1534159	1677072	1530497	1822039	1725291	1675660	1615936	1796044	369.984	21.598	neg
11	1327759	1181391	1645289	1597003	1368240	1481980	1842258	1860090	1528714	1780540	1337822		356.165	15.75	neg
12	1442959	977261	1440146	356562	1899582	625917	2190468	2080496	2159260	1918514	1683838	1951993	184.942	14.367	neg
13	773111	829139	1535231	881971	968272	1023222	979510	995852	662148	1841712	1487298		701.535	21.621	neg
14			1809865	1593859	1430656	1621141	1172701				478318	1571870	310.181	16.974	neg
15		716489	772378	851149	641407	954974	1899441	1084701	1015477	800369	846337	854201	567.353	13.89	neg
16		1003780	1363737	1561423	1206323	1286880	1501922	1771908	1521290	1546924	710506	1621487	384.196	17.09	neg
17				1590958	1430656	1628932	1543449	1521340	1497635	1466647	199871	1597076	310.181	17.026	neg
18		336323		713451	551369	1008835	810098	1129239	1443180	1500774	1755680	664494	213.918	14.439	neg
19			1431937	1472687	1280851	1278480	1240515	1295832	1266081	1268083		1306102	774.54	21.605	neg
20	507379	1151776	1292886	1317914	1355259	1479120	1131077	394951	633426			333968	717.531	21.621	neg
21	1131883	969747	1409003	1568361	1497262	1202552	1172120	1391629	1128314	1245412	1295208	1094280	117.936	22.069	neg
22	987017	830359	1074313	778295	847983	888690	1127913	1389482	1321728	1339455	1263084	1051764	419.034	2.389	neg
23	998319	1004307	1046078	1064616	1056745	1126266	1193931	1185426	1152029	1141499	915513	1176467	278.152	13.907	neg
24	231183	208441	246912	299999	250757	354436	1287482	977521	546946	1274730	945059	694534	244.07	4.232	neg
25	470246	416044	473086	554676	378029	586015	1099720	661632	594256	586204	571349	534601	541.337	13.666	neg
26	1467977	1798558	1767866	1285945	1544438	1773312	2348335	136777	1922892	1845057	1504262		701.534	14.013	neg
27	458666	435564	494254	438449	673514	299988	557397	345815	554226	473561	655083	719232	324.037	1.854	neg
28	402093	380984	374055	442124	307300	471616	1266060	621687	616460	480957	515716	522341	539.322	13.052	neg
29	1051551	1009120	513344	444639	417581	401877	357571	371406	367198	349841	388356	387323	172.954	22.435	neg
30	819947	819433	1286667	748989	561923	649156	616244	649476	563629	576268	514491		370.18	16.259	neg
31	178379	160652	191978	205231	174321	296938	972176	800003	466536	1076676	796659	669017	312.057	4.233	neg
32	917103	905626	1013120	1025585	1023698	1060623	1086704	1041521	991506	946457	938766	967130	305.975	12.4	neg
33	728079	704135	603178	788756	939297	586619	862245	328551	473206	236666	616760		618.195	9.245	neg
34	537410	500732	539212	594287	579137	491577	385655	701833	413950	610825	351118	623542	621.097	1.863	neg
35	1107726	922633	612799	590979	572017	472631	243743	200917	175730				886.556	21.665	neg
36	638734	480589	549545	454714	469571	610505	1347180	1414481	782244	1225031	1052237	724764	369.045	2.447	neg
37							401444						501.283	13.548	neg
38	753060	680633	990213	265840	1183813	975609	857279	849882	347045				858.682	21.649	neg
39	682868	656857	665480	676741	675529	705544	690320	731016	730525	728586	671578	657348	388.165	15.687	neg
40	539545	571051	594260	444716	358971	403101	415009	457349	413739	471938	200985		382.181	16.26	neg
41	271105	542177	556214	424934	333206	322121	233924	370227	380003	412296	306656	284333	356.165	16.271	neg
42	530904	375534	451118	583103	518355	588125	809831	703475	665035	468623	534939	613203	437.286	13.931	neg
43	642915	685294	613771	741909	748223	740824	740709	632269	617083	600416	593473	755578	294.183	12.446	neg
44	661844	501555	548644	366711	438835	566858	509605	557931	883114	818290	719192	615400	723.519	21.622	neg
45	254185	279615	343128	393166	277434	516980	696392	1068918	1044372	307584	809327	1014638	547.288	13.796	neg
46	400326	515246	199713	286342	270428	279838	217182	220943	286174	244853	242174	226279	136.978	21.586	neg
47	378928	400228	472695	438670	366196	477292	661732	539223	412056	491998	493550	418441	354.15	15.009	neg
48	473058	451564	526005	379787	361520	460967	580853	676606	706658	655747	663803	497763	487.022	2.377	neg
49	830040	674080	986904	455086	763925	487099	833320	623949	823987	705581	770330	951910	369.985	12.318	neg
50	494335	468563	391367	528050	622220	383565	573847	214892	316015	155103	406518		620.193	9.248	neg
51							390663	458660	501075	730189			767.543	21.63	neg
52	499634	491299	537689	390897	445161	496587	635391	763574					413.017	2.389	neg
53	496176	433302	518831	541842	447162	597325	956332	816480	783287	666713	733331	828494	481.316	22.101	neg
54	435585	442778	450285	548673	317667	506811	671712	556590	413543	745354	578973	637275	226.007	1.974	neg
55	299541	195795	515831	494850	563303	554566	474777	502891	493070	399717	535835	437480	413.973	21.603	neg
56	489694	468692	508965	578633	611998	587300	586169	594977	559802	554203	523562	543253	251.154	13.999	neg
57	236638	215358	210315	188733	202798	248306	1050339	791854	421261	568971	479175	561851	363.058	2.838	neg
58	603194	569407	614529	455002	461085	609490	893702	967562	758458	227659	848333		437.031	2.49	neg
59			346667	347224	372457	377360	317936	303916	337887	351183	335932		487.934	14.694	neg
60	520102	515165	556179	516881	541951	520644	463633	447951	432082	435101	369222	498768	278.152	13.48	neg
61	462607	470486	493690	506867	528062	536103	490329	520387	551167	558890	551865	538269	316.262	13.275	neg
62	162178	157615	165484	177915	150264	204110	540109	375646	445899	317967	423684	507582	451.269	13.001	neg
63	346491	427343	428102	455762	397673	390790	402220	463196	479468	377933	369455		501.284	13.195	neg
64	352302	161390	181174	215457	177991	234160	214785		178945	214880	189241	220478	266.157	21.611	neg
65			429143	496152	512696	494641	482156	447804	412174	444344	390232	506903	135.902	22.335	neg
66	566390		535216	487778	500326	495767	477051	484202	428897	482938	470266		357.997	13.697	neg
67				217198			524554	629023	598116		560185		391.035	2.382	neg
68	662149	469241	599442	603649	574569	563630	567825	551659	468754	304729			827.564	21.686	neg
69	590427	482008	263526				252269						213.919	16.351	neg
70	241779	210562	184970	283427	151650	299935	394862	374125	473413	250528	240481	408963	453.285	13.607	neg
71	458428	471131	539072	535061	518237	550138	517926	466362	497937	485039	469628	559311	196.147	12.815	neg
72	466463	584451	574061	520673	483989	528653	531850	467904	479897	511167	461031	534397	166.026	6.443	neg
73	444358	456213	321466	415225	374126	430327	584286	550914	418335	461348	471510	426142	665.124	4.373	neg
74	307160	314885	394963	458404	500477	503956	425367	462301	455403	447959	429654	429023	240.075	13.566	neg
75			274639	339259	124488	167199	204501	203422	420841	330536		285725	487.931	21.657	neg
76			228298	310589	285063	284503	283314	278083	243315				473.914	14.576	neg
77	196456	329063	214537			198467	570281	330367	320297	545253	486648	460392	370.03	2.581	neg
78	395026	372647	392676	381893	380546	397408	396187	408285	410668	402967	379534	383720	566.329	7.112	neg
79	461294	472738	449799	404625	418587	423435	402330	414414	432369	410410	414622		372.013	13.821	neg
80	350361	331106	278011	378616	447956	279998	402473	151974	216539		230499		504.202	9.25	neg
81			726120	212899	589034	623880	264169	263275	511831	656253		597207	595.931	14.927	neg
82				469388	432568	470640	427214				491417	534926	354.21	17.765	neg
83			324457			297890	475188	487032	481273	417897	444395	340173	273.096	2.384	neg
84	443505	297572	315429	393168	407854	382924	339586	441996	322155		420810	495994	140.952	14.367	neg
85	506704	481585	450826	660295	480754	553341	293572	551738	555746	406212	437479	297304	165.935	1.626	neg
86			297707	382156	428442	445728	386343	335116		373437	370142		485.937	14.64	neg
87				139517		143740	386680	207713	204610	175391	183928	181850	513.306	12.819	neg
88	209001	205392	162258	341039	108404	138336	180628	148189	144674	165276	128544	104864	135.901	21.55	neg
89			722616	299777	332883	619691	558747	427354	554066	578381	288234		581.913	14.805	neg
90				201136		165181	317451	157642	175115	507931			595.929	21.677	neg
91				483958	445345	445492	348751	264293	494170	277926	532742		609.945	15.033	neg
92	300032	317725	347965		330049	325576	392563	460586	421218	405940	416572	408888	555.009	2.359	neg
93	286560	195111	308405	385006	174515	332076	411778	320824	202500	445421	292171	303591	202.045	1.971	neg
94						348330	488109	577835	369414				505.018	2.448	neg
95			189929	205350		158601	392951	199764	224363	182081	161542		507.332	13.901	neg
96				406451	434048		444856	445111	428301			412825	365.148	16.925	neg
97	303328	287015	365107	407067	271240	332741	259733	284348	217538	397436	328412	291073	173.984	1.965	neg
98			396178	389752	461055	348794	452850	336685		205478	142391	265717	739.512	21.621	neg
99	342332	346435	344739	336261	325299	359972	381352	388306	346497	374820	348073	355693	270.14	11.815	neg
100	382038	397109	411566	391439	393966	381181	402387	400591	383241	353656	374307	395693	240.137	12.815	neg
101	366385	316930	310589	284935	293182	272295	251237	287967	255748	253756	259833	289831	222.162	13.662	neg
102				212660	265894	511546	469170	225214	242787	242238	221361		545.956	14.766	neg
103	295290	221556	368907	366827	221027	326573	275994	301144	235789	461606	278203	300944	158.018	1.956	neg
104			310561				308573	417006	344313	358303	377877	330960	548.992	2.359	neg
105				504472	320674	467995	276924		485725		474756		559.971	14.909	neg
106	311724	335761	291272	283156	340373	359436	330055	380647	320172	348663	299044	333705	330.241	11.799	neg
107	478087	505593	486556	440838	462788		415592	398806	443177	423332			391.964	13.734	neg
108	290500		221739	402620		332680	369285	321348		297732	340034	289485	129.042	2.897	neg
109	383186	385193	382953	364569	364226	381954	367778	372518	346197	372589	339310	348936	188.105	8.454	neg
110	173896	247777	265920	318660	223113	289325	266455	246960	201902	199634	224337	234148	380.166	15.054	neg
111		106157	288546	303582	277699	286776	295664	302626	300457	298627			842.528	21.568	neg
112	370579	371363	374021	311272		324141	306753	254060	320961	318760	297593		451.977	13.854	neg
113	206131	236539	238528	276066	238320	258949	311680	243950	258689	301483	241468	342783	388.164	14.247	neg
114	297477	246171	338421	246132	317479	275040	278494	298303	250191	264776	261475	265890	184.942	22.032	neg
115	409179	422056	440800	386011	349437	352209	247339	369377	333969	313847	221508	360722	234.162	13.623	neg
116	284809	278757	310451	358945	356487	341050	321627	324092	290070	326213	306523	378477	362.17	12.437	neg
117	378393	336641	402237	363343	363097	321476	277226	323773	373520	407815	374199	362778	122.037	6.414	neg
118			184335	322689	360679	375837	364520	324823	344099	351278	310120	359450	379.214	14.53	neg
119				349069	168287	168300	229984		210933	320190	323843	172546	453.97	14.65	neg
120	334884	349182		315769	308389	297827	309242	289283	299379	296625	292805		416.018	13.829	neg
121	311228	304867	304288	352225	326060	270569	292532	311828	300624	299569	286493	273844	222.162	12.44	neg
122	352639			346936		346916	528592	390080	327267		320787	323614	569.368	22.62	neg
123							299224	312460	287488	255123	257708		636.148	2.376	neg
124							885909	768310	584746	608937	404911	626358	765.53	21.616	neg
125	369392	355499	383023	390841	361671	381298	386634	377948	381190	367839	367867	418734	440.36	12.9	neg
126	324073	328073	338109	294369	311190	298710	298226	301993	300985	297430	279049	324559	359.997	13.695	neg
127	290067	257097	258145	276020	306362	313322	316891	315344	296620	319493	306170	292723	317.955	21.664	neg
128	334337	336067	378039	355552	354706	346148	346946	343494	322591	319425	294926	327448	452.336	7.11	neg
129	177822	178490	180319	205721	216051	221534	267089	252907	233857	244158	255176	241972	453.93	21.67	neg
130			182616	168390		247666	285686	286627	218308	234571	280822		527.301	13.338	neg
131			134263	201475	210377	204794	220078	212581	216542		192007		439.952	14.561	neg
132				187045	181278	192013	189872	200545	167806	189270	193054		437.958	14.561	neg
133	327388		316003	292258	333126	330400	324032	350218	292370	298853	346228	306233	449.975	13.882	neg
134	382916	543334	833685	891264	831973	141697	948343	980893	101650	85919			479.3	21.677	neg
135	476244			442902	481531		410739	396960	453403	450260		475146	391.959	13.74	neg
136	307610	318760	314937	312244	326728	320755	326563	329292	326905	322797	334036	317638	225.101	12.952	neg
137	273702	274780	275926	269963	278100	271075	264827	267201	270775	270684	259135	289570	237.113	12.437	neg
138			151024	170403	132003	323079	145470	205706					547.952	21.691	neg
139	276842	240483	248971	242140	243635	258581	216015	238981	232142	257149	223764		448.141	11.917	neg
140				164963		187811	338820	193697	189527				635.34	13.879	neg
141	226113	218363	184773	245675	290091	179678	268879	98478	140351		144818		506.2	9.248	neg
142	243710	235177	242154	191018	183369	192468	192389	194831			159832		342.149	15.244	neg
143	304202	299665	291751	257593	254409	246936	268434	277395	253167	252768	271652	282850	465.995	13.951	neg
144				96162	97332	133011	82845	89217		288452	271608	284937	219.995	5.054	neg
145	277734	273670	276332	256385	274267	255803	250707	235196	245830	240625	232671		453.975	13.84	neg
146	210057	206404	222011	243157	217810	264030	223700	212766	224002	217058	215818	227606	411.925	14.303	neg
147	199613	229315	233955	254451	240685	239497	255096	245539	220628	250676	243147		409.926	14.312	neg
148							250543	273958	242288	229507	231278		680.113	2.37	neg
149	273914	254080	260969	240719	243771	247800	229704	226529	242040	247411	226314	238966	420.017	13.825	neg
150				243552	237478	232812	217962	226600	216709	233062	224165	239185	838.197	13.628	neg
151	282766	279702	253021	279370	287394	294883	287014	295628	264853	272527	259958	282063	255.996	6.436	neg
152	269161	265919	261896	259136	229689	234751	251663	290723	270589	228764	279879	238820	395.911	14.215	neg
153	245018	238108	246498	202094	229731	214873	208706	200692	198355	196932			397.907	14.217	neg
154	259397	261777	266032	239918	226368	216509	214179	216228	213508	217163	205693	213062	432.035	13.957	neg
155	337888	315922	362960	394548	341258	351523	314575	296484	338013	325701	270677	370916	413.974	12.319	neg
156	147664	213439	169610	177912	253325	177432	186990	253905	219662	222594	326406	221388	508.348	12.897	neg
157	248344	228824	199227	259134	218735	190004	224149						807.501	21.615	neg
158	195723	192733	222328	232829	220774	201871	195447	220707	177831	205422	190581	185239	302.079	9.808	neg
159	184642	192994	165353	190105	213531	217158	213805	228153	231044	202729	161551	160649	330.24	12.397	neg
160				107599	114127	227167	126665						395.303	12.835	neg
161	208628	210985	214592	242481	209352	265336	224249	249246	227631	190927	173589	192879	197.032	9.362	neg
162							246503	398569	369722	268680	378914	91651	615.275	13.804	neg
163				152353		161863	279022	177080	165167	157442	165976		609.325	13.663	neg
164	334671	324868	103675	344128			293446		77053				294.184	12.888	neg
165	145719	136819	194136	113166	167398	167125	82853	216799	150063	226687	151762		319.084	4.301	neg
166	160651	176793	176698	184369	176348	178572	189823	186848	196626	186753	187891	183748	357.159	13.843	neg
167	231424	220803	230988	203421	206127	215360	202153	219472	222005	218107	204609	224403	353.988	13.748	neg
168	221930	213603	222014	189469	202937	185267	204987	188452	188711	208123	194525		467.993	13.957	neg
169				161474		173787	189212	190084	131680	158469	170656		328.134	14.838	neg
170	133742	137627	126438	132315	151747	158904	158301	163704	230166	158726	226116	144575	589.904	21.664	neg
171	210885	225526	210397	184393	183192	217289	201485		210564	207893	198681		393.954	13.78	neg
172			200417	200530	192330	196235	166014	177258	179423		218258	219631	172.11	9.33	neg
173							190914	158711	88171	212041	152254	108184	334.038	4.23	neg
174	121733	136395	122741	129047	123563	240423	231309		255582	224158	170566	226026	310.178	12.633	neg
175		106352					207719	149231	280082	191054	253125	117857	232.939	22.49	neg
176			136364	208316	195285	143464	154423	158910	177875	119279	119105	137692	137.899	22.335	neg
177				173674	170797	134664	114835	135133	172716	137924	162017	236490	389.164	13.474	neg
178	226294	232391	234609	217128	212797	202842				207428		209603	389.951	13.7	neg
179	125989	96804	123549	137911	147607	132972	126994	147547	167483	138769	113035		432.19	12.735	neg
180	228078	267177	247055	204337			176607		191708	205333			345.978	13.569	neg
181	176900	161944	134190	168965	128546	173176	233247	223150	174572	165411	170766	162145	687.106	4.38	neg
182	184173	175027	176797	194951	183164	187798	192775	190679	182211	184982	170930	175708	332.256	12.221	neg
183				159757	157486	154007	142817	151275	134918	144462	146142	143764	399.24	14.987	neg
184	180083	196120	179964	163809	171682	158374	150319	150855			145650		430.034	13.958	neg
185	133644	110392	147600	165367	146697	126699	122511	136732	164756	174519	152399		500.178	12.748	neg
186	127790	177420	155098	150975	162966	140702	134909	258037	156458	154516	135367	152032	210.162	12.168	neg
187	98737	54065	106986		125736	132782	113370		120924	125503		134017	312.176	21.613	neg
188					192959	180718	183462	180344	178637	172333	175950		122.912	22.375	neg
189	149577	172750	159675	188355	164414	168536	170772	161629	164132	143591	139869	177733	210.087	8.46	neg
190	128094	139041	163540	155585	134118	149934	142378	168287	131787	161452	179140	117273	376.112	12.803	neg
191	159096	173772	180574	185245	185720	169793	183041	179187	179492	170398	168260	169761	259.06	12.792	neg
192	80022	81509	94010	93346	76820	101767	85339	72318	99157		72805	108752	226.007	4.198	neg
193	139381	128280	160554	132517	166330	127495	133295	152984	147224	138730	130266		492.273	12.986	neg
194	132234	135470	109054	127757	123450	113489	116185	132494	141611	119288	146578	119207	430.157	12.446	neg
195	141358	137217	147118	143449	147178	140530	152935	160347	159570	128618	156177	181493	187.121	6.913	neg
196	122022	135969	153007	156807	162396	148394	143585	137461	148163	135651	135233	135895	308.123	12.813	neg
197				133501	148304	140757	158734	162323	161585	149041	169655	166414	220.854	22.515	neg
198	125006			133417	142160	115316	128970	128570	131199	163748	150566		441.949	12.398	neg
199	138451	137558	132047	143844	132673	130327	110959	113946	121605	129812		116062	194.094	11.219	neg
200				98632	83074	95832	111626	103084	89763	99063	90711		326.191	21.615	neg
201				133832	128669	131425	128476	122144		120481			779.95	14.097	neg
202				110356	114001	100813	94860	99596	98732	103233	96956	103653	354.219	14.03	neg
203			133302	142603		133268	128334		118101	130183	113119		180.082	8.166	neg
204	78047	83714	88677	76947	86060	84347	86104	74123	62387	75311	90146	72112	219.989	4.197	neg
205			969472	570603	439251	485367	471265	482933	432277	435840	378638	422010	370.18	16.258	neg
206	110139	124528	104843	112589		108535	114852	121760	126385	101923		114528	174.089	7.39	neg
207	93753	95283	97230		88045	101971	105146	87645	96601	83678			488.312	7.118	neg
208			80635			86923	92197	89604	78628			85931	346.14	13.88	neg
209	7917368	9458781	7783834						423715		321870	180538	280.171	16.299	neg
210	3082444	2610733	2010561	1822046	1677124								862.557	21.664	neg
211	548855	1084556	921095	300755						1360356		1597760	348.052	2.592	neg
212	1484718	1597183	256736										136.978	16.39	neg
213		322722	101280			67981					216797	204099	385.94	21.669	neg
214	1003193	679199	917100										811.53	21.625	neg
215		777612		817525		450004		672015	1268468	1146874	1233338	339378	699.567	15.421	neg
216	654048	559545	450005	474973									836.539	21.664	neg
217	748312	545845								818684		769440	751.546	21.622	neg
218	813853	368733	401536	357432				570412				425556	749.534	21.614	neg
219	720809	439821	416633	388976	353514								746.51	21.616	neg
220	386386	418574	415944	382698	357434	379487		309341	326199	303517	318167		343.981	13.557	neg
221	196813	232997	313784	116842									384.196	16.343	neg
222	421037	444772	446502	421696		392922			391278	378343	374011		387.984	13.681	neg
223	277909	311148	238889		202723	274367							643.079	1.872	neg
224	259466	258628	241308	273922					263000		253606		463.995	13.962	neg
225	255042	219049	126972	131214	117584								772.525	21.616	neg
226	326527	237473	173177										814.535	21.654	neg
227	720809	439821	416633	388976	353514	384107							746.51	21.616	neg
228	226294	232391	234609	217128	212797	202842				207428		209603	435.959	13.786	neg
229	150798	151241	181507	151298	146952	202303							430.308	13.183	neg
230	152620	171802	194696					129678					396.196	16.365	neg
231	96477	89016			105849			132325	101114	136066	98458	120444	341.065	4.309	neg
232	172095	169317	176667	154014	167066	179541							590.345	12.85	neg
233	113848	115026	106293	114180	107420				114698	130823	152608		309.082	12.933	neg
234	1232526			1207387	201677	250386			199980	313503		250356	358.214	15.18	neg
235	363877		661744	214597						685810		454966	816.559	21.637	neg
236											239731	267676	249.967	21.669	neg
237										139341	122022	118557	287.983	5.047	neg
238				609710	588392	571621			482507				474.288	19.431	neg
239			138469	139461	147037	506480		283501	153962		192749		473.916	21.676	neg
240			192120	318645	350184	430040							516.253	14.768	neg
241			160373	254206	227420	249520		197670	243368	224592			471.918	14.612	neg
242	88264		81109	81359	86085	86305							532.261	7.112	neg
243	2211984	2267846	2257469	2266659	2176510	2230654	2253041	2254297	2296867	2211691	2263022	180027920	273.267	11.909	neg
244	2125471	2095629	2437190	2039296	1960468	2299115	1356740	1525566	1321742	1595845	1616985	99228248	414.204	12.834	pos
245	40503816	48223284	44309640	44108372	36178392	37709488	31303106	39731516	34520844	49942780	28671396	97800400	386.173	12.334	pos
246	32801976	32479668	33471932	29971732	51291360	86727464	53262940	27652044	26468960	45091640	28060688	28581640	303.293	12.825	pos
247									6667878	68001792	88875936	95857728	731.547	21.637	pos
248	6728863	5438202	4264832	3421311	2180144	2154971	1861430		2618626	3339637	7635869	7353902	785.593	13.926	pos
249									13628430	60760036	74814024	77047896	757.563	21.641	pos
250			4044748				99330	2786833	2590001	11532705	21627952	15899535	757.563	13.97	pos
251										77155	72962632	3511362	731.548	13.854	pos
252	19006192	13968775	14049528	19826164	22624640	49826344	21663368	12122640	11804772	17581160	12658417	12155027	331.324	13.185	pos
253									10473676	49095800	53432800	6830255	702.568	21.637	pos
254	18460240	22012420	20603876	20490514	16480442	17354156	14172273	18907986	15829040	23411546	13665903	42968784	424.129	12.333	pos
255	777222	740233	726735	650201	704290	755197	383714	424188	464045	516836	544230	33937824	452.161	12.834	pos
256	12090518	11348765	11249773	11799930	8077129	13073590	34654800	17523172	17888378	14738089	14590272	14285024	521.348	13.891	pos
257										34644504	31364980	44661208	702.568	13.827	pos
258	28196108	28051162	25761524	27650080	26549164	25806336	25351284	25067482	24696008	24149158	23138730	20940244	257.272	12.819	pos
259	13680150	2925612	4758833	6027680	21707136	23535668	5811922	3965861	4072159	3690439	5859166	3007256	320.308	17.626	pos
260	13822401	11704588	12395804	8778583	7536216	8247831	9872793	11959109	10784816	10927123	8693747	8954994	358.142	11.344	pos
261	27721400	29740860	27564920	28292178	28297952	28130944	26868716	27066048	27006444	25610748	26008440	24913124	633.446	14.22	pos
262	27168056	28443336	26847844	26705134	26978778	26400588	25456304	19992020	25375504	24757676	20640820	21770152	677.472	14.209	pos
263	7740236	7247574	7200479	7661833	5592138	7663301	20680104	11927807	11141731	12043796	10130244	9046356	495.332	13.744	pos
264	2139231	2096723	2115737	2017524	1968489	2024250	2036834	2017121	1065654	2006907	1956973	21463920	229.241	11.948	pos
265	26188002	22334288	26005332	25172086	25385300	23647876	24587780	17928128	23407976	23232236	22919366	22882316	589.419	14.238	pos
266	19055472	23636052	23686392	23197392	22249360	23054848	22491200	18177984	22218558	19840188	21842642	21831472	721.498	14.18	pos
267										16982264	22933148	25132180	705.532	21.644	pos
268	18707576	16826490	17321080	17406756	17729080	17919188	17487756	17289600	17443130	16311558	14683434	16172599	463.351	14.797	pos
269	14948058	13187885	14570315	14555364	14378483	15006792	13804584	12743482	12678583	13823840	14386142	14529356	229.241	12.286	pos
270	12711450	11858642	13542599	9544084	10198157	12419498	19706846	20375124	19438104	19180004	18965208	15385991	307.084	2.386	pos
271	17906932	18430186	18177694	17544344	17577936	17096120	17006756	17907668	18298726	18093632	17678882	17536750	765.526	14.161	pos
272	13338459	11834772	10583200	9508467	8268512	7497997	6505867	5658328	6183075	5184102	5210803	4153025	812.678	21.646	pos
273										12038058	19664736	18939816	724.55	13.722	pos
274	17243746	20310900	20619422	19374870	18109150	19735380	19124228	19097856	18426726	17380146	13821458	17192248	545.393	14.264	pos
275	3406350	2765569	2255101	1755537	1251963	1133354	1282099	1596604	3225927	7967425	6691594	6831344	781.561	13.859	pos
276	15672897	15135374	19121264	18372170	17416176	17708896	16264372	17391526	7941869	284032	15332218	14644287	484.34	14.344	pos
277							1751772	6850578	7659840	12449850	19303790	19283008	729.533	13.82	pos
278	13455085	12985125	11724309	11626426	12022120	11159560	12318479	11101252	12076985	11287110	10226492	10153382	468.307	14.798	pos
279								1931706	1874026	9142531	20135590	18476252	779.545	13.809	pos
280	14234574	12821011	14529814	12550008	10453891	12926938	13555783	12113085	14243466	10539935	13602665	11372085	809.554	14.138	pos
281	7478611	6360046	6676545	4703142	2506259	4070325	5120667	6388734	5758358	5853320	4626886	4728414	396.098	11.337	pos
282	10333146	5101408	13665062	6352799	10847937	13388039	3455258	5041870			335139	14216456	787.606	13.897	pos
283	424067			504717	455118	461975	483508	423011	509104	382987	388161	9389685	317.292	11.951	pos
284	5701525	5951214	6115356	6064246	5545453	5906612		408472	4612438	283382		9097596	809.587	13.855	pos
285							7027197	10944423	10746796	9300889		7992127	729.538	21.632	pos
286	4751912	5500387	5218710	4943830	5782237	5159743	5514399	4686555	4778743	5316353	8533348	5024330	325.371	13.307	pos
287	5975817	5821149	5123470	3708686	4245122	3189736	4535184	5148773	6827968	4676065	4646065	4351496	521.348	21.692	pos
288	2679223	2465378	2157394	2086111	1753039	1841433	2085087	1979671	2152310	3485883	8328330	10411459	761.593	13.882	pos
289							6386013	8939582	8563457	10770681	8679094	11582701	703.516	21.642	pos
290	13497516	13266432	12765804	6296970	12007102	3420663	12477228	12902077	13394892	12941749	12922321	13078780	787.609	21.637	pos
291							2055744	5606071	8825183	9029485	9519015	8879528	805.561	21.637	pos
292	8343930	9705098	5676933	9858329	8439527	9234033	9529577	9065680	9021291	919231	7967980	7531584	440.314	14.422	pos
293	7359837	7697381	7806729	7535602	7331171	7781261	7408442	7410723	7414609	7431455	7337409	7587607	370.221	6.161	pos
294		6552061	5079074	6564528	5628670	4706431		7831968	10032467	4629083	9928333	10564897	721.544	15.48	pos
295	6784989	7174938	7199986	6975382	7098824	7016414	7100371	7004189	6936020	6868637	6886361	6945292	414.247	6.393	pos
296	8322073	8536705	8544764	8153597	8188982	8377893	8209287	8353761	9813016	8914728	8691724	8302668	853.576	14.131	pos
297	2177337	2078566	1962066	2413022	1700588	2701592	8220927	3913672	4091860	3562437	4096175	3636625	493.317	13.056	pos
298	6965732	7227652	7062835	7150851	6991379	7232389	7117490	6925992	6908422	6983347	7018493	6792404	326.194	5.912	pos
299	5905997	6034520	5948662	5941463	5527413	5929688	5994797	5970635	5895049	5920563	6021371	5990364	458.273	6.604	pos
300	6364140	6573418	6795229	7040899	7063489	7022854	6364087	6066705	5070481	3532637	3293386	2897444	117.079	21.77	pos
301	4250340	4299286	4584801	4233434	4453673	6170893	4490539	4637259	4548202	4358221	4491694	5024132	283.324	13.268	pos
302			4608260	4805538	5010972	5074511	5600308	5946761	6238423	6088526	6437906	6304531	773.628	21.667	pos
303	5815914	6198481	6302212	6245254	5818815	6295462	5956586	6364196	6076728	6188321	6273805	6267838	226.168	5.748	pos
304	2240239	2116503	1726800	2493296	5713430	1694245	2428695	898054	1332168	679140	1641417	779301	504.204	9.231	pos
305									972235	878043	866003	726174	875.561	21.679	pos
306	2653587	2555369	2736133	2798015	2170245	3411308	4886038	4540471	4774011	3381469	5687793	6239109	479.303	13.8	pos
307										5811217	6148650	6493251	747.523	21.619	pos
308	1536350	1498125	1219881	1694300	3928665	1126942	1698014	615508	931044	449955	1118165	516207	253.101	9.23	pos
309				2347056	2222788	120774	3174995	139816	3377649	4216992	4754229	34118	773.6	13.898	pos
310	4851224	4991427	4986445	5208816	4899058	5286575	5275673	5253130	5314348	5241645	5178453	5288693	282.168	5.66	pos
311	6282584	6167528	5098850	5024025	4211918	4053814	3991427	3432877	3330294	3480229	3194641	2691245	812.677	13.851	pos
312	5627526	5432232	5437797	5705015	5439760	5294689	5720816	4759635	4969981	4476111	4225174	4899259	528.366	14.366	pos
313	4525680	4833970	4680326	4660276	4773216	4713126	4624130	4687888	4732842	4606035	4633655	4687815	502.299	6.795	pos
314										2322950	2872504	2885147	775.555	21.614	pos
315	5137965	4057159	5313194	4330963	5134393	4042450	4880371	4743084	4542713	4549582	4274388	3070497	227.262	12.724	pos
316				3259488	3142655	3096022	4351024	253017	4520530	5075562	4999770	5011908	773.628	13.851	pos
317	5403275	5603823	5494820	5245514	5186332	4976472	5099732	5047619	4942754	4501921	4410149	4505280	594.374	14.344	pos
318	1203847	908461	1341987	1162713	1147301	1807306	3857412	4146205	2424669	5178652	5013892	2761308	265.068	2.305	pos
319	4425509	4008923	3941186	3597848	3645464	3700876	3756763	3678861	3710120	3667101	3540948	2542170	213.246	12.247	pos
320	5127249	5021120	5072709	5156344	4722535	4679307	4842748	4968190	4809391	4444117	4107318	4346616	638.401	14.332	pos
321							829989		6277909	6115142	6289698	5493551	805.561	13.84	pos
322	5060677	4981007	4824520	4674204	4467722	4474875	4747184	4847377	5072493	4587902	4489975	4496569	810.593	21.636	pos
323									1078304	1348283	1502471	1280723	823.549	21.687	pos
324	4111068	4321523	4200309	4239878	4387666	4105044	4118708	4010566	4047272	4184089	4092275	4064195	362.303	14.689	pos
325	3832944	3492936	3156567	3904851	3622998	3797727	2373598	2745696	3596039	2865408	2319215	2326308	310.157	13.64	pos
326	4281270	4149640	4232775	4237038	4049460	4010352	4127287	4063439	3982378	3786883	3834778	3600053	241.277	12.818	pos
327	4386328	4323403	4398549	4327441	4286078	4407563	4387048	4287792	4358220	4319872	4301077	4372282	238.142	5.371	pos
328	3989791	3368882	3684175	3916168	4032501	4040006	3658833	3799806	3881985	3263062	3642271	3393756	318.277	14.688	pos
329	4941547	4935020	4956356	4858761	4904357	4901177	4860216	4856525	4711536	4785222	4967970	5079838	897.603	14.13	pos
330	1697886	2035508	1852093	1862184	1508871	1600960	1330889	1745044	1469903	2148594	1273441	3850832	426.13	12.334	pos
331	355664	337866	297726	522134	373084	780564	895656	526742	574341	548263	491697	2610418	306.076	4.322	pos
332	4347886	4180283	3601576	4029931	3931142	3764941	4038539	3801449	3968487	3655049	3211360	3931894	704.471	14.313	pos
333	3642220	3847802	3940391	4012372	3887624	4023716	4091716	3992870	3973270	4037774	4047824	3994617	546.325	6.976	pos
334	3859337	3640093	3578416	3379567	3215246	3247613	3028679					2717464	813.622	21.649	pos
335						2158333	2424054	2517125	2952447	3098938	3269440	3728081	747.611	21.665	pos
336	1331793	1304755	1229274	490303	1072981	1153664	1211961	1347101	735010	3445638	4056163	3691757	825.554	21.689	pos
337	2970914	2964788	2927936	3038143	3264136	2959938	2929290	2651623	2539583	2798128	2394770	2968907	406.329	14.745	pos
338									1477719	3807345	4347534	4487810	795.518	21.684	pos
339	3793240	3756904	3642564	3699667	3679481	3711697	3658006	3629105	3578295	3696458	3643422	3672990	194.116	5.021	pos
340	3152770	3114400	3151758	3316524	3148617	3462450	3124891	3230302	3223332	3173078	2985059	2759945	383.34	15.531	pos
341	3593741	4500028	4023788	3871774	3378698	3265018	3354437	2797636	2786965	3677106	3438788	3272325	812.66	13.892	pos
342	3603552	3271149	3350370	3333314	3501768	3198841	2941319	2907153	2967862	2739840	2398766	2132816	396.287	14.439	pos
343	8733145	6852316	5281179	4313766	2626159	2525714	2085256	1847386	2163318	7120210	9994758	1247684	759.578	13.898	pos
344		338177	317140	305529	282819		246169	353151	655311	1198020	1028723	1216977	602.527	21.676	pos
345	3220031	3344729	3299024	3210391	3263598	2915815	3300783	3252334	3282407	3252201	3306231	3313242	227.263	12.306	pos
346	2804383	2942047	2771887	2823772	2754743	2772887	2861501	2798171	2590040	2105987	1959649	1815251	229.241	21.75	pos
347	1905640	3037310	377897	2944603	1619357	1587111	3142225	2681989	3033317	3376093	3096977	3246074	450.356	14.763	pos
348	3307670	2950828	2825506	2763823	2646901	2652523	2495917	2494556	2468510	2301899	2160157	2145499	385.374	13.698	pos
349	2302809	1557259	1849619	1423200	1915872	1749722	1641708	1744994	2152925	2653162	2386210	2907387	636.298	14.496	pos
350	2922194	3006886	2657294	2994783	2888155	2961457	2575500	2642747	3050762	3113523	2875954	2976805	157.09	4.172	pos
351	2329741	2516000	2508523	3083455	2578475	2393529	2455038	2380684	2488311	2464258	2498993	2458112	452.336	7.111	pos
352									4314546	3811893	4607742	4054398	833.591	21.637	pos
353	1415998	1237144	1133089	1128756	1013301	1384263	2560737	2733844	1531933	1798513	2035663	2316816	347.062	2.451	pos
354								1873283	1909250	2448976	2549390	2533504	747.611	13.876	pos
355	2462422	2471745	2557678	2549767	2554982	2586358	2696339	2798255	2718295	2556289	2749749	2677837	394.356	12.902	pos
356	712544	721728	778481	805351	756770	783377	735198	781067	793687	742496	759362	2793731	289.262	11.981	pos
357						149351	1053136	1397610	2167846	2554973	2775004	3232714	741.534	21.62	pos
358							499882	987888	3069674	2426830	2221580	1539364	803.546	21.626	pos
359	2718324	2632894	2630795	2620643	2602139	2918713	2675865	2964303	2676487	2723872	2533523	2532073	770.479	14.294	pos
360	1999698	2138704	2195214	1798170	2117168	2134346	2140159	1943421	1842380	1845590	2085686	1500723	303.293	21.734	pos
361												51796	771.587	13.864	pos
362	1762017	1726203	1770671	1764456	1811449	1823125	2122045	2284285	2230002	2337563	2267525	2139415	264.245	15.142	pos
363	3380318	2735163	2261016	1758760	1237820	1132038	1273178	1591943	3211717	7957478	6685553	6831344	781.561	13.859	pos
364									3429939	4481647	4608975	3952261	749.535	21.617	pos
365	608556	415404	501694	352634	589779	423604	409631	443161	464962	3200663	490479	610167	518.131	20.878	pos
366	1091222	556426	467568	1938055	925368	2161365	843413	462233	461834	691747	436928	544612	359.355	13.467	pos
367	2323380	2339865	2340098	2350822	2349681	2332314	2211239	2328837	2281888	1984570	1803785	1651680	382.272	13.866	pos
368	1761407	2046741	2006740	2263948	2186003	2359219	2495359	2546685	2559942	2540803	2548302	2515449	590.351	7.141	pos
369												831846	691.548	21.678	pos
370	407461	421896	372844	258144	250087	372155	334349	386737	391940	390811	378331	2297269	767.531	5.641	pos
371	2356108	2356493	1501482	2335110	1323907	2472083	2186788	2469958	2365053	2117671	2372440	1890044	332.292	14.991	pos
372	2601464	1551964	1370385	2985827	3028768	1460210	1492707	1499003	2646326	1575334	1251096	2004614	143.975	22.226	pos
373	370701	1714578	1677746	1877401	1852647	1840699	1737975	1726171	1493582	1651698	1587088	1600274	390.277	16.239	pos
374	2196469	2234225	2350844	2351814	2282245	2257593	2134608	2261300	2227673	2139595	2186921	2196151	138.981	21.967	pos
375	2075533	1416615	1749139	1828894	1939771	1855101	1782880	1977112	1931022	1672406	1736902	2019752	814.506	14.283	pos
376										523564	611451	517865	823.55	13.743	pos
377	1604134	1726649	1846219	1884738	1952923	1912808	2130234	2193294	2086023	1878915	2011431	1825945	287.246	12.977	pos
378	1977447	1998495	2017530	1983164	1968394	1899570	1660907	1760159	1652066	1255555	1004321	1076189	257.236	13.907	pos
379	2000954	1919078	1965360	2378166	2075820	2088983	2045115	1950962	1935338	1926759	1893886	2035565	511.408	14.746	pos
380	1626645	1307811	1156792	1328544	1602632	1140684	1020596	1126353	1536384	974332	1345635	886602	390.334	15.739	pos
381	1774613	2279273	2149364	2154150	1940880	1641305	2053570	2386477	2122632	2095400	1900955	1836801	430.171	17.633	pos
382	1719489	1744056	1594174	1526798	1708536	1746518	1631470	1631213	1436209	1283877	1130095	1080318	257.272	21.779	pos
383	1862544	1750203	1815542	1803291	1769146	1995412	1838558	1782360	1719359	1727829	1882275	1548187	227.189	11.818	pos
384	1051608	1303249	1383773	1470960	1629188	1682240	1783480	1859377	1891861	1880879	1680246	1558870	284.199	13.221	pos
385	1598762	1499382	1601567	1555479	1525938	1456078	1537521	1629245	1744765	1580916	1573518	1512121	337.334	15.554	pos
386	1093455	1771806	1744058	1689431	1700491	1954665	1731061	1011827	1806943	1686511	1709731	1763026	376.318	14.995	pos
387	1317209	1293017	1486683	1003576	1091911	1278171	2165013	2169434	2135943	2028167	2055056	1618648	351.047	2.387	pos
388										2591093	436055	2940986	833.591	14.023	pos
389	388525	304771	299515	303974	268551	281582	321048	278513	314832	303954	296476	2162196	484.351	5.379	pos
390										198288	2370812	766230	740.524	13.734	pos
391										2422836	2814981	2561294	749.532	13.909	pos
392	2238466	1766942	2161355	1697484	2178128	2087134	2139109	1867528	2032812	2159873	2018382	1503082	170.131	14.798	pos
393	1667129	1523877	1427117	1472279	1475553	1500228	1353168	1382744	1504407	1407856	1374945	1573353	401.35	13.185	pos
394	1644321	1698476	1694591	1684134	1740150	1731077	1779590	1676801	1829564	1853383	1817265	1776488	255.293	13.181	pos
395									897688	1803917	264069	2953513	825.556	13.674	pos
396	928849	896581	831684	889673	749872	962589	1908615	1183846	1096869	1008960	948573	835921	495.332	21.856	pos
397	1832466	1799256	1796508	1872061	1774368	1796733	1703046	1686834	1686565	1471516	1280833	1405716	266.165	13.574	pos
398	296256	392360	363354	418185	354103	369734	305561	387188	336617	349307	284126	1165441	1050.71	5.694	pos
399	927845	962895	1071393	1751811	954057	1120588	1092576	1010407	968018	1069801	1099441	979710	478.387	15.745	pos
400	1621798	1655635	1592694	2037249	1631385	1591698	1416448	1441768	1528456	1450273	1459859	1593081	555.434	14.729	pos
401	1977279	1677217	1513768	1580723	1598094	1637502	1422952	1500609	1542705	1392224	1311192	1841330	429.382	13.497	pos
402	1337970	1436269	1457790	1332709	1435065	1476374	1373897	1399225	1373457	1122324	1258759	1217484	331.324	21.767	pos
403	534864	453898	423110	634910	594041	682186	1882693	1576728	920115	1813367	1889904	1831116	281.041	2.298	pos
404	1070461	1279629	1266218	1162574	1342270	1287279	1284362	1265494	1127236	965042	1175500	1012147	310.157	14.652	pos
405	1285548	1477625	1621104	1104569	167230	1241359	676854	891330	882211	572083	363979	174868	394.27	13.913	pos
406	738060	693962	792579	496993		593759	2096931	1532291	1151423	1966581	1595994	1507056	136.039	2.833	pos
407	1510944	1079581	1677035	1701364	1507370	1479832	1138475	1325229	1255134	926251	743784	763202	148.016	13.983	pos
408	1241878	1172534	1024379	1069540	1148221	1164412	1230046	1174048	1041742	1182345	1229221	1187207	177.115	4.713	pos
409	696708	652472	714523	1756879	685673	691717	643249	740160	626520	681308	720487	753093	583.467	15.728	pos
410	1648432	1606215	1524966	1551631	1328943	1403858	896316	858046	683454	732648	787042	954850	604.542	21.687	pos
411	398947	283546	299628	301821	307174	319445	314168	306315	284423	304681	281071	1492649	301.189	5.307	pos
412	1489450	1320838	1286302	1201183	1245469	1170279	1187831	1107770	1156753	1172831	1114156	1009875	199.23	12.134	pos
413	871349	767729	813314	1768283	807820	887994	855446	754040	823232	759791	861376	904839	539.44	15.745	pos
414	1141342	1207098	1255540	1164229	1152575	1196022	1210051	1243848	1255184	1180443	1067989	1124975	426.298	13.909	pos
415	2767782	2401040	2148953	2106255	1739133	1847716	2077266	1964940	1974042		8552597	10408206	760.987	13.876	pos
416	13439565	2806857	4793592	5917626	20983660	23004780	5781588	4258051	3988590	3853880	5608151	2914605	337.334	17.626	pos
417	1609163	1344976	1556609	1483220	1470818	1510955	1470636	1521320	1476310	1438800	1484174	1428825	647.46	14.546	pos
418	1222084	1133138	1237704	1479569	1148881	1306970	1215570	1187875	1206189	1163836	1192849	1195608	599.461	14.719	pos
419	987074	1011974	907105	1281260	922564	986942	1011790	867970	899707	1020624	963213	1531078	434.36	15.739	pos
420	1099841	1179265	1170788	1188313	1198985	1271158	1296172	1152590	1170454	1229448	1211425	851057	342.288	11.893	pos
421	1259019	928664	119804	1253756	1183417	1474785	943791	1430028	1524954	1405727	1324507	1392106	324.135	16.443	pos
422	1232921	1385646	1323878	1315579	1224545	1252169	1321403	1127976	1300740	1237246	1284573	1094543	197.178	11.765	pos
423	1536980	1539981	1520534	1499114	1476835	1538531	1505261	1507228	1520155	1261801	1408672	1396596	603.434	14.569	pos
424	1163644	195288	329068	530850	765131	967882	294892	113656	197017	176424	225585	196187	351.314	14.671	pos
425	103545	353174	247005	110652	1131098	1418617	609202		154213	427656	273718	218678	225.246	10.032	pos
426	1422600	1381530	1372548	1372900	1366161	1393161	1329183	1361598	1127515	1095241	1058916	1102881	691.487	14.533	pos
427	1024476	1075689	1143737	1207042	1159865	1052962	1195165	1093308	908227	1125780	1001771	1191917	346.308	15.739	pos
428	418834	336808	394650	348230	374872	327761	392849	313188	371228	328246	411747	715485	299.192	6.379	pos
429	495220	600310	500105	498331	446683	437053	359001	484271	431955	581588	313976	1275208	266.116	12.336	pos
430	970603	1137387	1154926	1178691	1182299	1195032	1205763	1187919	1147633	966232	891814	852723	342.288	21.896	pos
431	585128	598121	549599	1377121	604784	659048	631796	580511	531112	593947	647069	623147	627.493	15.712	pos
432	556413	547842	569410	562517	571797	561490	502698	569866	546856	520810	575180	366990	243.256	12.259	pos
433	1313352	1303535	1261201	1519340	1256360	1274910	1233406	1270228	1222177	1179452	1032588	966549	559.408	14.579	pos
434	275492	367388	317407	339488	233206	251087	177346	274871	207515	407982	153865	1200265	810.302	12.333	pos
435							892614	1114959	1206579	1172961		1458711	674.535	13.828	pos
436		417173		475648		478331	1101570	865980	887444	684790	681057	722232	437.291	13.872	pos
437	943139	1018755	1153585	1063517	1019367	1059937	1076169	1116983	1089058	1104974	1038256	1070129	287.246	12.135	pos
438					72016		1805841	1344542	739461	744261	1290666	1481238	523.364	22.523	pos
439	332466	362143	344094	352946	346441	342628	301178	439009	354991	375021	337047	1327615	767.531	5.501	pos
440							683787				1195998	1378555	798.658	13.857	pos
441	535435	632627	778605	842831	861368	930213	1033616	1002189	1091041	1120469	1069066	1153248	634.378	7.293	pos
442	841910	365687	611955	679146	445714	484663	870908	896493	1323166	710438	812533	720433	299.282	12.699	pos
443	436933	471160		459082			839269	326554	638036	580430	863965	581837	519.331	13.318	pos
444										1337343	1245881	1238001	817.593	21.637	pos
445	692862	575580	633034	409983	235070	371266	477392	591373	522480	501728	434525	440606	398.099	11.347	pos
446	527386	384106	414005	413861	652160	1158403	696410	387309	316775	670752	345862	439061	211.23	12.825	pos
447	62146	60559	18415	346635		646292	921851		558987		894149	621575	810.657	13.861	pos
448	1060241	1072568	997757	1087548	1090609	1046168	711042	871180	820587	889667	1074495	907261	157.147	11.985	pos
449	563527	600684	598566	501730	681956	590247	709911	489052	479931	483997	463119	806145	301.298	12.525	pos
450	845105	903551	852777	965466	1026871	1011573	991337	820252	994992	914406	969723	968939	484.28	14.798	pos
451	365405	340464	258185	313360		332623	1028476	463508	539324	459795	593502	529714	507.332	13.478	pos
452	1338597	481293	738325	1296062	981388	775872	755551	665163	1247718	1289061	788754	795648	145.973	22.258	pos
453	752734	886910	757167	916871	908238	863044	992690	921621	1053746	764044	1013595	948458	257.272	12.558	pos
454	516245	503678	492451	504344	532432	506194	441048	483774	577279	517649	290628	266372	301.262	13.906	pos
455	1193497	1137583	1116935	1108088	689626	1130882	1110287	871238	997815	1076746	1078074	1089513	735.513	14.53	pos
456											433233	435297	576.511	21.684	pos
457	961249	906927	896294	655497	659624	775893	1026659	934974	980348	711005	702381	770694	663.109	4.193	pos
458	658391	684278	756251	668981	607682	756864	624337	699375	654449	668222	652197	912831	287.282	12.134	pos
459							669479	701523	1036368			850847	699.482	21.694	pos
460	585132	577539	578426	601579	497208	534494	582812	587042	573015	605579	559696	1001592	245.236	10.572	pos
461			878614	981099	939472	933146	862152	899660		872238	894348	876612	140.976	21.97	pos
462	840263	907608	945807	929150	878273	906015	906641	921073	915577	915996	907106	864955	428.226	6.526	pos
463	886912	907253	896979	914411	881189	857357	767938	811585	748544	522880	403788	371896	271.251	14.076	pos
464	364143	330025	322313	375222	284574	400501	794681	477038	482756	357802	285061	305192	559.304	13.884	pos
465	996008	901113	898696	1144271	847671	1037345	981483	910493	847220	926712	858796	1069062	643.487	14.693	pos
466	393798	260191	272927	299823	294092	317589	279924	277226	245254	228146	192666	201202	370.221	21.513	pos
467	787336	998195	1208946	956827	846028	916232	863889	821417	1101711	889658	821595	759239	208.146	12.486	pos
468	380880	269983	297629	287162	258867	251454	229461	260955	263744	289812	266328	965020	484.351	5.181	pos
469	871663	848762	819547	870003	829204	896347	838108	890900	792205	811970	830258	803059	384.199	6.289	pos
470									1055653	1685459	1349353	1259820	743.548	13.935	pos
471	226487	184724	232814	251634	215786	238758	263638	205590	227295	227535	222890	894026	201.174	4.258	pos
472	735677	778858	829863	836650	843375	862224	800968	782760	770708	583283	474256	440113	342.147	13.787	pos
473		1031111	1024524	958675	935532	1200916	1136736	1037568	1030796	1136660	957021	1034033	398.35	13.414	pos
474	989546	982056	929086	964790	922588	975639	985891	949552	931066	929231	915609	995550	446.396	19.214	pos
475	841921	862301	857063	825399	833405	870943	837815	843053	807091	740735	809452	860673	472.252	6.742	pos
476	703742	701771	728976	662489	678010	657276			598077	460840	382252	358297	355.272	13.931	pos
477	785941	771308	807422	830984	830606	884361	769325	716994	627386	480534	449496	417462	201.173	21.51	pos
478		481959	272084		1321329	323651	789137		220214	479840	586478	392663	252.257	12.578	pos
479	643153	623106	431533	566450	488091	649713	955471	518790	665971	646677	752500	829766	359.011	5.464	pos
480	892055	934993	910871	928310	652015	786025	857744	918645	892346	865032	786607	896039	260.103	11.418	pos
481	1068564	909752	939752	882169	923565	954840	843679	901480	833076	1029084	802698	877942	172.071	4.622	pos
482	865735	841731	804007	949458	894156	831311	849805	699225	733850	802468	728377	818717	367.418	13.931	pos
483	826852	855498	892390	883510	874419	878857	861962	845743	860478	852591	881293	876905	340.173	6.03	pos
484	608270	502815	518283	418689		472311	1212648	964525	1064923	961174	1015051	1139699	481.317	22.031	pos
485	958329	833260	981643	943060	853673	856780	908425	926775	927347	928646	866424	954359	184.108	8.223	pos
486	446726	405394	479811	470314	344921	510350	803136	596048	568317	564104	626150	720197	453.286	13.627	pos
487	887392	900767	896811	896425	905856	917812	876477	829959	792061	900590	917677	876093	296.147	5.756	pos
488	836281	657945	650168	586398	606341	635897	527769	630577	662555	603563	515993	540189	334.273	13.897	pos
489	804859	750797	746884	708103	825813	751744	748124	827972	836341	848303	729929	809425	170.092	6.25	pos
490	335367	462443	421954	400470	185625	370469		390253		363793		533669	120.055	12.336	pos
491										541155	434789	444807	134.037	13.65	pos
492	502634	624373	689608	631168	648750	522523	514766	514363	640856	470028	636881	694901	290.246	13.887	pos
493	431318	409369	642888	269689	321264	382198	479943	1050801	740071	1110625	685346	673587	257.103	1.586	pos
494	256708	254493	263481	289378	186079	327016	785541	461723	415011	427429	373023	328032	533.289	13.71	pos
495	704692	278991	313079		462364	387350	538349	519732	583482	828266	559475	1063527	338.28	13.69	pos
496	687988	565423			392224			584529		1032166	1208505	1407688	479.302	21.669	pos
497										335276	768923	847044	743.488	13.715	pos
498			546556				660514	832029		680262	725230	687467	742.427	14.317	pos
499	321736		303206	343023	344491	345306	292275	332120	325272	298467	274322	817445	357.358	13.38	pos
500										969887	243750	834985	847.533	13.674	pos
501	633372	691644	534740	525351	376955	589476	1063607	916386	852923	682603	762109	645001	523.291	22.503	pos
502	619709	634609	623268	600230	640002	689931	640599	578618	637164	613187	461495	614037	490.424	19.238	pos
503	510413	511629	460717	499074	432238	457105	484229	467765	221034	434784	428435	872640	881.558	6.39	pos
504	630048	603365	495160	547059	622209	447423	675561	573830	512460	553312	537059	585713	148.016	16.233	pos
505	1002135	814234	813640	687980	689712	660654	659915	630170	609761	581031	555268	563122	387.354	13.489	pos
506	763838	724061	728253	722958	753055	728002	712479	712724	719633	678484	693555	704742	600.346	15.301	pos
507	608439	612496	407659	410306	76223	127514	692981	378061	754889	99558	348506	452272	285.303	13.184	pos
508	554060	556743	615171	610423	652611	644582	749463	826430	714191	816455	725651	548567	877.578	13.722	pos
509	752429	706126	833006	819457	761009	810920	789879	844550	806479	720420	808005	717943	224.103	5.789	pos
510	396174	365501	430210	876529	372145	521575	460784	433535	440445	434559	461926	401703	671.52	15.703	pos
511	280158	265811	250903	176174	137772	142758	316088	399080	672771	380089	325599	342508	399.336	13.211	pos
512	685629	735780	746314	669850	677862	719262	728739	753162	640299	723491	647551	723759	171.126	7.327	pos
513							272734	280940	101671	886580	1116327	1310685	743.489	21.62	pos
514	905863	458656	485489	433895	496443	394601	511762	524095	517248	514474	629958	614292	786.454	14.31	pos
515	320866	371243	351062	335883	310210	308032	239388	320796	267220	281624	234300	417290	104.063	12.333	pos
516	380947	362111	388729	373954	477879	448864	361072	360422	353507	348931	344767	684645	311.355	13.572	pos
517	292677	332462	317149	312713	240407	265842	224683	273704	204960	336176	194165	562800	431.231	12.336	pos
518	788007	815703	844379	816546	839988	830552	854084	864339	876250	865681	818038	768169	443.324	13.913	pos
519	602571	448208	420340	634709	475771	656155	442220	397640	458961	536305	352214	338227	326.194	21.501	pos
520	751871	742731	744793	757283	734055	760534	759024	770185	778755	725476	691231	666475	199.194	13.456	pos
521		105795			471031	159863	299944			193916	117601	139484	300.278	10.772	pos
522	593518	560494	601862	494894	519582	512339	571304	532288	579990	559803	455445	454711	325.371	21.765	pos
523	741745		665307	860600	550480	690190	573373		636797	674574	608318	628572	494.387	14.733	pos
524	774017	719575	699964	618191	584729	423319	627109	725712	730074	614936	646570	551641	271.288	12.752	pos
525	653198	740625	749958	663016	724928	733893	649111	729792	733075	734258	722980	718352	252.121	5.451	pos
526			549587	344407		532103	402304	648851	466183			585228	347.194	12.3	pos
527	367521	300794	302722	358315	81039	337245	312061	423512	247149	206692	340842	671920	271.251	12.235	pos
528	472415	617551	667701	674934	740708	801815	591326		663671	687758	783479	735046	481.397	14.997	pos
529	458416	415813	422960	412433	297428	433404	607126	490101		411811	391065	187781	481.351	21.868	pos
530	607843	689185	680136	678765	619216	673103	683114	681621	628311	582198	506091	454172	225.945	21.685	pos
531										442943	748928	872506	775.563	13.919	pos
532	690643	498575	613389	763765	675563	598449	648435	488353	681856	594396	575657	728269	687.513	14.679	pos
533	270888	237388	269257	256832	246352	271317	269327	252091	220538	272857	238466	793994	584.367	5.777	pos
534	335820	398193	413544	451405	446900	484672	521338	546594	546492	566427	536453	539680	500.132	12.046	pos
535		421842	421238		408818	426765	495313	492237	536531	498117	510713	469198	370.321	22.031	pos
536	279997	293341	313169	322066	281530	331705	305196	307498	303493	322600	247905	669609	329.329	13.001	pos
537							702037	672069	611154	571868	556855	523069	362.299	19.406	pos
538	231632	244885	268631	276215	201222	221660	184578	245894	217804	289207	177908	629541	368.163	12.338	pos
539	563229	507358	523700	624968			245434	487071		590664	683426	549888	569.449	14.988	pos
540	649598	531775	402094	304712	262886	192364	141429	158622	219053	326742	346280	245488	338.282	21.685	pos
541	767184	733837	687514	720231	669502	745523	666231	641254	612045	766276	715074	872017	437.371	14.995	pos
542	639019	472073	482134	613838	439351	896521	655734	631663	740987	472478	376554	620187	102.948	22.245	pos
543	328584	373554	356452	325425	362419	367819	334774	399799	333333	377874	312728	621816	1164.74	6.413	pos
544	398746	382065	359824	419399	426267	429750	384152	470193	415158	501798	523416	429554	422.228	12.607	pos
545		445494	437624	436775	337781	383040		481157	513170	504682	479784	484669	464.243	17.715	pos
546	497029	551964	553779	548848	513746	567296	581565	533704	522949	575523	533368	553034	516.278	6.935	pos
547	402970	300276	410296			300502	1168093	1118954	645763	1180211	980877	804871	158.02	2.868	pos
548		311841	209567		610209	216318	459709		226054	303456	430218	221123	280.288	13.05	pos
549	568329	606486	604908	620256	601674	600046	617993	638746	688099	664660	629672	444434	492.274	12.982	pos
550	451386	502697	597130	443926	404538	425553	471815	459915	437039	369424	572689	395797	193.111	4.461	pos
551	317217	305381	322504	286590	261320	325690	285081	285162	273959	256757	283377	111926	317.293	12.55	pos
552	255776	224464	218087	221770	197966	222299	308450	209956	221636	226293	237657	593494	315.205	6.152	pos
553	178034	249591		339056		204185	265974	465429	554712	233221	666245	187038	501.287	13.187	pos
554	560414	556073	552678	553561	502051	550844	551836	530582	544973	517996	538557	684472	217.204	8.639	pos
555	488362	465561	488377	454369	433207	441197	398725	432003	432348	452148	445349	396941	315.314	12.736	pos
556		221316	187384	202660	190295	197731	336675	205318	200614	207639	433992	261644	567.331	13.229	pos
557	371189	242673	255469	251684	271444	256170	281400	263351	364611	488284	255201	314914	636.299	15.286	pos
558	551993	551548	682117	564830	625088	471818	573596	555368	544567	584861	602269	486246	775.225	18.037	pos
559	143118	160113		241781	230910	563689	226424	133219	91020	201991	159651	164581	239.262	13.181	pos
560	426516	460242		422611	467866	479863	434227	432565		423135	402335	480809	391.22	12.253	pos
561	228791	254083	248393	237461	203844	210636	178292	219543	201062	279525	162065	576460	280.095	12.335	pos
562	310421	376195	358175	337008		288250				381710		629432	417.215	12.331	pos
563	495318	475337	504466	499773	486677	509923	502904	540745	592751	555305	505631	471856	269.308	13.248	pos
564	644046	396471	414364	377253	434458	477303	517760	484044	467594	614479	422639	366776	668.325	14.787	pos
565	409168	447286		378490	503183	414380	355296	396390	349485		367540	433840	823.566	14.492	pos
566		150475					561154	1009956	835028	848336	739975	701732	139.061	1.41	pos
567												848130	819.611	13.789	pos
568	500888	459687	491851	475367	456066	492488	441953	432571	459713	373155	304972	302618	160.089	13.667	pos
569										631192	483551	738455	779.556	21.631	pos
570	181164	207508	203698	199035	193984	289874	186645	207592	236739	178279	225156	584226	867.549	5.941	pos
571	1140067	1207024	579807	1135487	392623	535199	1123899	514972	372578	899381	629270	650842	166.006	22.416	pos
572		409867	400837	373128	316296	276287		453575	471203	480914	441110	520704	420.217	17.416	pos
573	340652	339044	376367	356260	371948	359634	388234	323829	255650	255908	213286	207734	213.246	21.731	pos
574	490470	481555	511428	504614	486753	496796	469487	483290	496240	453161	486183	459725	211.112	7.025	pos
575	371620	426974	467524	492226	525659	514237	411567	371186	297004	242423	152772	114745	163.121	21.572	pos
576										272374	460223	446836	879.472	14.2	pos
577									211370	245949	539740	562888	574.496	21.668	pos
578	381174	275954	364291	294652	350643	253923	299077	254048	324683	368445	360462	478133	598.385	6.144	pos
579			535990	463748	467266	415538	575025		451675	555332	605215	414185	849.244	20.241	pos
580		281058	299530	328350	363113	398476	398424	447299	449412	442319	458624	452134	350.267	12.973	pos
581	384524	380865	351989	429998	398231	417141	377280	335337	314669	179138	99116	126461	731.539	14.655	pos
582											179713	230257	800.548	16.612	pos
583	401305	443204	443829	443216	456113	422750	386953	401029	380706	298469	233437	225591	278.152	13.976	pos
584	450148	460007	372915	398786	315533	435702	337501	307143	291566	361541	285990	230664	507.368	21.949	pos
585	405523	448185	438869	449430	428974	438760	405988	424537	438917	443460	411178	413086	354.146	16.542	pos
586	434093	376287	464123	427390	405486	396465	505003	415609	398581	450710	442531	416921	701.206	16.592	pos
587	403913	381319	382309	372071	356471	350908	373913	359438	353222	368078	341738	315593	607.378	21.576	pos
588	228970	210684	157007	192384	178610	221770	459286	218378	286691	279474	302730	322553	297.09	5.463	pos
589	314311	284629	211946	257452	234926	314278	441208	242018	319680	322829	366628	390779	361.009	5.467	pos
590	278700	438808	350467	395138	314232	384646	428187	367459	312858	290495	358388	350019	226.193	13.115	pos
591	226942	225829	262529	230165	222270	234854	212122	214646	251838	211237	211964	225299	520.338	14.579	pos
592	403103	393984	422344	481632	451288	405725	475037	410308	396391	377244	352807	473497	310.12	15.22	pos
593	363683	374035	371414					445288	523289		390657	395591	425.343	13.257	pos
594							370183	255442		421658	357873	185198	508.153	2.28	pos
595	431917	404969		423841	385088	437920		400853		402186		428553	551.475	19.213	pos
596	175872	224393	228574	282324	293658	319185	370488	407330	447432	444931	451844	460837	678.403	7.436	pos
597					270529	454612	221635				480445	503979	830.48	14.255	pos
598	453507	437410	413301	439810	429463	412220	429638	412978	414540	418473	457702	453675	651.405	21.596	pos
599	106891	116340	171043	186536		227356		228182	231081	225015	303525	330621	441.329	12.416	pos
600	347512	345594	334560	341042	253676	342628	344940	360925	367153	358123	362289	359987	250.155	8.975	pos
601	267329	223449		234233			537508	400302	371205	340334		297727	509.348	21.83	pos
602	402866	394766	384377	418246	401919	421647	383547	409066	369115	435046	456895	448509	230.077	5.079	pos
603	458427	385090	451381	353858	423389	361845	441836	395025	435262	405293	392762	367447	627.187	15.602	pos
604	482733	480389	404520	424082	408920	401257	390187	416406	461587	444089	435696	457810	159.105	4.186	pos
605	306099		377188	346931		449995	546426	547940	429560	320755	482019	533660	527.302	13.331	pos
606	378461	384954	400444	395414	436926	431762	381407	407687	433887	329831	251954	250242	162.068	13.797	pos
607	286673	279027	186387	311594	334744	496381	344677	362007	338529	297060	337328	541886	352.151	12.293	pos
608							383920	366260	246055	439641	395277	323386	333.055	2.29	pos
609				247217	78674	313723				96107	309120	259517	619.429	13.966	pos
610	470825	385989	277510	330277	335773	300151	280614	322007	398948	367454	336679	328239	501.843	14.047	pos
611	407063	454913	437550	394537	469731	459250	374517	372630	308713	170753	145774	88950	155.035	21.77	pos
612	362377	342247	331012	370563	343986	349751	334973	352833	328343	315074	259377	266160	398.244	13.859	pos
613	352294	237203	291798	366633	344036	266780	270090	285175	240791	195443	175727	198655	374.243	14.453	pos
614	263024	279669	310076	238411	223571	230358	220926	208377	234494	237802	242723	184475	251.223	16.348	pos
615	324088	304969	316019	382940	304884	289893	297164	283821	287013	250135	283302	259875	1134.76	14	pos
616	180789	175405	179321	200500		208949	480976	287461	252098	270145	250343	224714	585.303	13.693	pos
617								399669	391096	395912	390818	389223	320.253	13.482	pos
618	426020	387424	387640	362784	293885	335587	356657	359692	377949	388593	356768	398071	201.209	10.637	pos
619	326269	323558	325640	338586	336749	326699	347578	322120	320264	286260	287706	268713	421.296	15.561	pos
620	360841	293087	330904		356227	330911	338129	366454	339996	372670		294801	435.246	12.2	pos
621	385863	389193	369465	339659	365443	405286	359166	360598	367287	404672	360833	385168	247.215	6.56	pos
622		330341						327465	368952	311805	329936	363336	530.25	17.78	pos
623										344183	383753	338603	824.476	14.05	pos
624	328206	281161	379788	379107	309054	303288	356238	260171	282013	321358	292805	278442	483.377	13.847	pos
625	353214	374277	403799	399350	342744	370655	329758	270233	381150	378820	266634	316358	195.162	11.798	pos
626	373460	387982	367221	367023	362624	356153	327560	352228	319221	316005	316466	286893	563.352	21.563	pos
627	322862	290977	321730	307933	295611	329914		292270	303383	339551	293666	290552	487.351	13.986	pos
628	357068	348706	360991	377318	323438	363423	361253	387697	359235	369883	347293	355003	173.178	8.668	pos
629								120854	161707	193852	268424	400344	600.511	21.652	pos
630	156526	174307	181626	180979	167475	161821		165082	142513	175627	119474	444213	465.215	12.327	pos
631	229116	245119	287939	254697	263818	208834	308200	281598	273423	142017	231431	198884	519.326	21.542	pos
632	264171		275177	249990	263181	274653	263647	226382	210997	160466	123477	109576	402.226	14.204	pos
633	461889	376889	349118	317288	350311	357037	328385	314647	295351	254367	242781	226910	382.062	22.336	pos
634	317628	347754	308691	311753	252966	280997	321641	304666	292814	318389	357471	320227	212.139	10.82	pos
635	346302	327969	326062	362278	349928	343015	351381	333012	353906	392283	361252	381906	205.132	5.059	pos
636	359906	346810	298424	335556	327834	316035	332565	253151	252167	261311	273367	263172	867.591	14.482	pos
637	308596	321474	327708	328971	320695	306670	312738	321517	287355	269470	265648	244141	523.856	14.033	pos
638	156000					163062	261603	281413	203616	330095	306155	225157	363.058	2.841	pos
639	371260	320331	348406	323898	370368	299490	309782	347852	269679	321272	402542	302866	272.161	7.586	pos
640	196157		203601			198720	227892	234207	243378	256648	236585	253672	455.345	12.922	pos
641	337940	316747	297737	283792	283020	303710	296014	274146	288168	264745	270903	312457	213.173	10.888	pos
642	417289	360336	374899		325530	378800	355189	352551	379467	334201	294738	371347	531.379	13.992	pos
643	233475	248207	235279	224198	230982	229475	231937	209379	186303	165112	149505	112125	401.35	21.777	pos
644	293110	257463	229234	312621	705540	205830	321416	112773	168743	84972	197432	102594	508.199	9.229	pos
645	281452	260985	274521	359723	283722	268859	290181	283179	281325	261239	299081	307259	339.252	6.243	pos
646	267086	230989	300698	283830	323617	289028	550001	340139	345339	360544	521803	378344	308.125	12.383	pos
647	290078	307128	330186	331051	327979	335870	352715	356648	368138	328458	349368	334454	577.331	7.115	pos
648	458493	381818	406775	419943	407818	362518	445640	357065	412101	372483	453248	803783	598.386	6.378	pos
649		161357	149109	155618	167158	150941	173696	197730	197512	172496	210914	128576	426.259	11.883	pos
650	292381	289984	287655	318523	297997	282446	262018	270947	303762	286697	270063	256891	564.364	14.565	pos
651	308845	297785	300339	239426	215270	209293						193557	825.495	16.377	pos
652	261383	196800	241426	192164	178453	189072	231835	220600	235157	190513	227482	177422	157.089	1.94	pos
653	296378	288917	301461	285700	261426	278653	301798	311412	324105	326285	304311	295936	199.157	9.766	pos
654	178806		151995	127562	180056	159476	117375	170333	233802	285344	231878	284595	694.352	14.501	pos
655	276211	335704	330643	308053	335946	303323	332993	328170	322411	325594	327604	300824	340.209	6.642	pos
656										266690	338613	276817	853.46	22.024	pos
657	374994	402212	395858		341992	376901	390182	383103	366515	386666	372711	362062	248.199	12.061	pos
658		227040	226495	243207		251056	249653	253412	262801	245470		237062	409.338	12.778	pos
659	325158	333256	316461	286372	274460	299571	256924	266200	262407	304209	241141	305100	608.389	14.541	pos
660	248656	198447	155334	201336	211314	224863	313313	293054	224903	265697	268117	226351	665.125	4.376	pos
661		141785	181728	214896	287842	270750	258433	262836	310191	334598	353429	373881	397.303	12.416	pos
662	303117	283731	338800	290221	260594	313715	302317	302023	318245	274506	256073	312988	652.416	14.51	pos
663	269165	275500	258351	268052	279777	269264	258283	226450	216592	174029	166521	152685	429.382	21.827	pos
664							187027	290160	381464	352134	286974	299925	525.286	21.653	pos
665	229309	265261	291391	256996	239951	308467	308639	284272	214707	211510	226881	216003	441.392	15.57	pos
666		89790		106560	125282	170249	205685		233205	88726	91198	225464	299.282	12.987	pos
667	184755	135888	173791	140202	129219	126053		132307	131610	183048		322545	439.402	13.365	pos
668	231411	272585	183005	211049	214172	185511	206581	284650	326794	230722	302016	253184	504.377	14.813	pos
669	284616	291308	306971	322985	293727	295641	296633	292207	264118	270717	279339	247436	183.978	21.97	pos
670	265621			296255	275034	288665	296148	253066	280500	263282	284862	287514	308.22	8.59	pos
671	179385	178669	192107	185247	168613	179751	168068	180934	166993	177832	133707	189369	266.15	7.924	pos
672	239469	300878	252089	214722	246659	229829	227457	237504	286686	253253	288447	228374	532.273	14.893	pos
673	216393	208772	223406	226496	234383	298046			110322		91523	131435	217.131	4.538	pos
674								164061	170422	162193	163531	169367	426.26	11.12	pos
675	260138	264548	241416	298607	231698	260081	253360	246033	231816	231420	255781	255867	523.445	17.134	pos
676	259789	247619	255632	255993	243262	242565	233361	260628	229368	253272	260508	261663	567.47	17.141	pos
677	278243	252904	258343	258186	269627	255919	244968	242438	244268	244862	226295	238503	696.443	14.498	pos
678	136379	135643	137829	146042	134572	155631	119399	132540	123873	150766	123768	314701	584.367	5.589	pos
679	236306	221572	244343	216290	254359	207471	207233	217383	224070	213160	235117	218923	401.262	6.885	pos
680	182006	150408	156871	145159	151410	146187	140816	146349	147773	169309	148146	247061	315.204	5.764	pos
681		171022	144263	159643	150716	163971	139868	160988		166805	127494	287541	1150.73	6.067	pos
682		98646		71391	123374	69362	75141	77136		66063		114806	354.237	12.215	pos
683	257634	243409	251787	240603	200779	234491	252191	253399	258636	253314	259647	236773	268.129	8.523	pos
684	169176	170273	177937	295109	227734	157064		134106		199473	171841	214990	527.403	13.854	pos
685	167076		159490		153851	102714		168915	143202	186421	123101	179457	539.42	13.489	pos
686	184068	190266	187241	221979	178573	189889	192361	174875	170784	155880	151852	146031	283.324	21.787	pos
687	202211	202303	165845	250821	195654	190133	189835	207097	261906	192461	195112	197182	241.277	11.415	pos
688	235167	219919	228932	236542	206612		220111	223648	208087	222426	219096	202406	345.322	12.546	pos
689	202076	246682	181535			223490	218730	265553	318484	230958	294998	210638	340.15	8.223	pos
690	143993	164790	162046	191500	157024	167064	141158	162426	151707	162391	170232	150289	148.016	12.535	pos
691				115876	159882	157593	157745	159058	169012	177929	155516	137332	330.24	11.81	pos
692	158412	142207	209257	128837	174463	168608	97550	219006	174150	257738	171833	225945	319.084	4.308	pos
693	227949	229061	245278	251094	237673	239104	216440	226021	197353	179626	153155	144223	429.906	21.685	pos
694	218712	192746	202380	220484	207011	207074	202187	189809	215483	214891	194293	209691	218.167	11.095	pos
695			120927	143975	150639		202533	174032	182400	201614	178020	191702	427.314	11.787	pos
696	223712	192502	214148	220399	247700	210459	177107	238229	201282	242509	186529	208149	296.183	6.363	pos
697	252136	244065	173372	174697		197140		188164				105965	821.477	16.528	pos
698	227251		237251	180998	200019	231480	216478	224505	227391	229116	198416	155308	183.162	12.265	pos
699	201508	224033	215239	232383	226215	220536		201773	191950	171281	202416	170074	569.415	14.148	pos
700	135205	174086	188664	240586	101645	271207	239377	169942	203895	176221	102956	209394	457.817	14.077	pos
701	146578	156003	143012	153081	134557	139664	125220	157488	133716	154027	117635	216373	622.307	12.33	pos
702	195432	188487	211214	187200	189672	180969	238370	185691	191431	194881	185907	190469	129.151	6.056	pos
703	225881	260997	215252	223053	226489	216192	193298	185219	191464	189828	196788	207582	740.47	14.492	pos
704	246398	180870	201838		165079	172057	174300	193412	154594	156185		198511	440.125	12.223	pos
705	178208	179428	189024	197579	183796	185073	221477	175919	193251	200314	194436	200339	446.325	14.804	pos
706		173009	168371	149407		173494				122385	119154	107480	612.335	21.567	pos
707	242870	153897	175043	144928	159813	146189	129828	134420	150404	141727	112231	130966	826.193	14.454	pos
708	191603	199674	211957	222803	199850	179396	203459	185652	177073	199669	179654	200696	214.118	6.352	pos
709	128469	139500	140307	110543		95535	222037	218165	140320	172824	178391	125023	165.079	4.954	pos
710	187297	190035	201181	194707	199346	202663	208504	204056	190084	208389	205198	192728	239.225	11.896	pos
711	214221	195889	204336	237027	196603	204372	208574	204786	213218	215623	200702	211792	654.298	14.891	pos
712	175802	186554	185917	175341	195404	192927	180102	193652	197131	182316	180841	174890	333.215	6.904	pos
713	257336	174893	206047	189070	228780	165530	236662	169639	197401	205806	206915	181319	268.165	6.976	pos
714	209243	192715	185364	154738	189350	223413	213135	205622	194395	212115	164830	161951	545.869	14	pos
715	103895	113333	115086	120537	120957	132387		134292	133714	130285		188598	333.288	11.952	pos
716	191707	220742	217085	209518	215633	207203	204805	204519	217219	236058	187004	195047	445.288	7.108	pos
717	145553		137892	171915	145155	159273	142401	146315	149855	138566	130995	147904	339.386	13.783	pos
718	189985	170810	170185	171147	192674	144872	143577	175642	167254	140893	134928	134213	239.262	12.825	pos
719	174644	160114	169432	181952	164840	181013		177119	168819	153136	164089	169442	216.151	11.576	pos
720							230497	232503	223262	198515	219429	186836	187.047	2.006	pos
721							166296	179851	160887	200267	192578	96967	158.04	5.417	pos
722	178846	189715	185792	190452	158309	169778	166100	176186	190711	187269	183857	180852	261.231	10.797	pos
723						99757	142194	159581		173593	153934	144956	471.341	11.813	pos
724	172994	199953	190791	209974			184998	173113	169558		186099	195838	232.093	4.761	pos
725	186985	194352	178363	138378	135390	162002	200612	184611	206528	148400	129007	147245	122.048	4.192	pos
726	112919	121520	112415	112611	113544	116264	110623	110301	116702	113043	107695	130020	252.157	5.831	pos
727	221404	207823	213697	164128	197772	218179	221925	207000	216210	223731	210756	194368	266.173	6.384	pos
728	151918	176204	161440	164533	176702	181516	177858	163273	149915	137951	104181	104813	497.893	21.686	pos
729						148982		159308	136680	148611	136498	147162	499.372	12.918	pos
730			168974	117168	113213	139363	131654	124149	121476	171798	121087	138507	364.098	4.072	pos
731	191745	181664	194808	190807	186743	194875	189495	197535	194801	194765	187245	191305	391.064	6.094	pos
732	135926	126979	138300	155864	151352	162838	160096	141937	146722	135935	114117	107325	452.335	21.63	pos
733	96631	99538	95187	83183	85531	84996	89171	77205	58849	46267	65059	54553	241.277	21.764	pos
734	119713	125790	127315	101083			194749	166037	110456	152037	146671	95314	164.049	4.243	pos
735							160946	115330		178268	107015	84812	266.053	4.238	pos
736	165954	176914	165053	163334	169026	173280	156209	160645	146061	114682	102115	101137	361.919	21.689	pos
737	144708	145915	147099	153130	141459	153224	167654	172227	167311	167118	160328	147783	239.225	21.893	pos
738	156295	141441	143506	144030	112739	130768	168353	112653	130498	133688	132426	164792	429.236	7.804	pos
739	114975	136959	135813	118581	130211	146729	138129	142179	149925	141752	115298	140552	432.311	12.9	pos
740		117743	138442	155710	149987	150321		147151	139400	161358	215607	193950	182.092	5.54	pos
741				125690	105811	118963	117299	100239	106138		101046	121283	255.292	12.896	pos
742	128787	145695	143428	138481	150755	147026	131370	128468	121462	97485	82720	84296	285.303	21.811	pos
743							108483	112864	105273	151793	172293	172358	245.162	6.299	pos
744								111027	125254	133064	137740	162406	398.351	22.454	pos
745	174396	184333	189732	182337	158862	177607	176697	170773	185765	175015	175692	190654	233.199	8.936	pos
746	99923	121176	134750	143694	150371	168175	184007	180360	166981	169352	178274	179840	621.357	7.278	pos
747	126743	130480	118581	134808	124857	130635		110321		102291	99787	95395	568.309	21.554	pos
748	83044	85479	105072	111969	138343	105442	111118	104736	132092	108487	123523	104031	269.308	12.65	pos
749		153625	156080	158180		147933	175286	156918	153810	160703	152620	167431	698.399	6.818	pos
750	96628				85310	87206	95339	100997		81673	92434	89488	211.23	12.286	pos
751	131951	144207	147877	130492	140379	166047	156342	146719	144513	152162	146265	146960	489.314	7.308	pos
752	121833	113169	117619	117159	105731	115123	128510	125675	115221	123487	138323	115480	508.268	12.147	pos
753	119116	106894	100919		113552	126815	128892	104861	120076	126473	113406	120831	218.167	11.666	pos
754	114134	103018	115089			98726	140361	150696	137372	121965	130529	114876	197.121	7.596	pos
755	115629	110327	104839	120972	123753	126701	118937	107179	109316	84909	62736	68584	427.366	21.787	pos
756	114804			95233			114888	102252		100987	95429	117836	415.222	6.766	pos
757			103632		121784	120282	110746				108834	93795	656.363	21.584	pos
758							127684	104683		154867	113405	72577	328.022	4.236	pos
759		87540	114451			114336		94551	104775	81575	98146	99563	254.152	12.162	pos
760	121640	128782	126108	121789	133484	122087	122722	122573	126205	110054	104661	111581	364.099	21.751	pos
761	168020	143487	144190	129439	110037	133775	160647	107600	130951	132064	121255	162997	712.415	7.477	pos
762		149734	139690	153418		146898	142320	160180		161163	160666	112698	213.083	12.176	pos
763	98316	109754	100780	107912	100543	100324	106881		99663	106545	96353	99331	276.119	5.121	pos
764	119110	132549		118143	133931	148523			146755	137336		132606	208.158	5.741	pos
765							150754	133804	145189		106794	135111	267.292	13.057	pos
766				113598	119190	118115	121953	119347	120119	123788	120695	110733	389.048	6.274	pos
767	94758	75891	87501	83522	82862	84127	67627	84520	79465	97547	72299	109114	301.189	5.04	pos
768		106306	105378	146811	110866		106512	104733		103124	109213	99777	403.242	5.897	pos
769	112464	133746	125618	118832	137452	123469	108172	111197	112813	113595	119605	114715	324.096	5.646	pos
770							97666	80579		84273	92060	64976	290.063	4.519	pos
771	103849	106621	97343	103358			115128	103583		108732	111341	115514	231.184	9.845	pos
772	129103	120170	125050	126849	122106		87319	128311	131309	127933	124121	130792	359.214	5.664	pos
773	110714	111073	109354	110887	96568	116873		111672	102893			114816	261.231	8.838	pos
774	111148	115844	102908	116248	95654	91398	116220	96368	109719	94586	104603	88551	452.203	6.39	pos
775	90057		87099	86319	85105	94959		95934		84461		94681	276.099	5.367	pos
776		81223	82391	79842	74983	84785	83875	75085	76548	73836	79965	74639	320.125	5.655	pos
777		58112	79558			49803	61416	62716		85590	56398	59546	348.176	5.598	pos
778	14850097	11360240	8848657	6603025	5097260	4048651	2923014	3183946	7962645	10997146			759.58	21.65	pos
779	4290785	3955528	3225585	2785751	2291416	1806856	1419803	1466390	1509720	947978			771.614	21.652	pos
780	2634377	1996755	1543043	1204613	962683	794178	1018659						733.566	21.657	pos
781	2453980	2459657	2374077	2233859	2075425	1762871	1477471	1238830					719.582	21.665	pos
782	2702007	3108053	2778976	2353561	156188	1670285	1408001	1261674	1035670	127584	1218333		771.613	13.926	pos
783	2123599	1996608	2162386	1987310	1932648	1944578	2209033	2015046					813.621	13.878	pos
784	1507528	1433976	1446797	1164965	949302	1548329	2323756	2425766	2323717	1246903	2178227		345.03	2.392	pos
785	1697744	1620037	1617652	1601213	1579578	1518294	1537197	1719343	1704302	1566414			789.616	21.666	pos
786	1168670	1195721	1230113	1220334	1180893	1196440	1043956	1074010		958374			941.625	14.062	pos
787	1760926	1301648	1280497	1476298	935522	1099086	1207750	1270281	1446040				810.658	21.635	pos
788	1950104	2078715	1877210	1950795	1758706	1635873	1411227						719.582	13.897	pos
789							563879	1475114	1796825	1644128			777.535	21.644	pos
790							1225360	1624471	2645259	7814436			779.548	21.625	pos
791	4508176	3817990	3341515	2683488	2284490	1817232	1412769	1446296	620528	949331			771.611	21.653	pos
792	821044	1332218	728555	672045	726329	719162	506453	469945	550735	490299	518433		530.396	20.767	pos
793							972114	816029	416337				674.534	21.648	pos
794							1139839	1933137	2398496				773.532	21.626	pos
795	1232761	1244166	1008541	1193699	1168478	1235857	1063463	1299161	1172874	898907			858.531	14.263	pos
796	2395397	2222371	2165616	1778640	1348118	1291306	1176825			544527	946985		771.609	13.926	pos
797							1262271	1446039	1430929				775.571	13.861	pos
798				286228	483286	463906	652732						538.285	1.666	pos
799			511824	833739	1130670	542433	1113229	582994	1208303	848684	645475		326.243	12.782	pos
800	586239	468782	410042	355021	347796	306129	316950	286011	277048	281380	310026		850.636	21.685	pos
801					672094	807071	516061	641935	525536	197238			779.539	14.481	pos
802	744480	730086	694363	749247		636718	714638	713770	697057	626453	706552		315.275	12.693	pos
803	511040	533942	674457	650010	559738	532248	549760	656683	506774	524882	608287		378.298	13.881	pos
804	842358	632071			641992	672478	635892	858563	584514	657091	651766		525.423	14.988	pos
805	758666	197765	731147	729702	632311	611805	804765			427357			707.501	20.144	pos
806	314224	178885	676786	926633	893226	673637	134892	822118		888142			761.522	21.796	pos
807	731699	499128	554644	553171	371314	643148	1215836	975420	1115287				481.317	22.143	pos
808	380670	391188	396221	408610	398139		386634	321324	325990	277450	232728		315.276	13.928	pos
809	200383	169736					190689	154218		262594	131801		279.255	14.632	pos
810		230702	243846	204598		182337	443633	432331	274637	343916	333058		119.073	4.957	pos
811	429740	333065	341337	367844	351059		304974	328977	333389	324085	332301		424.15	12.233	pos
812	272827	248994		219762	150142		456846	237532	221029				643.256	14.081	pos
813							324013	340913	294358		302983		391.027	2.405	pos
814	335494	370555	362375	401010	342118	361862	375994	388814	398181		392561		380.244	11.892	pos
815	254230	244390	253984	289920			235872	234755	188855	209322	213039		775.566	14.64	pos
816	290746			343028	289981	285537	220052	272104					536.528	14.073	pos
817	413327	385556	392933	365161	387751	404146	392131		386388				695.432	21.607	pos
818							345931	139412	317490	113783			701.5	14.071	pos
819	358042	536489	587735	540794	467665	602551	450513	558930	312776				280.241	14.056	pos
820	376790	320704	338796	318758	331116	281990	400903	283116	332644				851.569	21.653	pos
821							117391	161001	377550	303049	253756		759.485	21.624	pos
822	174951	283475	203989	203286		237878	340891	244077	201159	198468	181715		103.1	13.702	pos
823							335825	375145	346492	272913	338401		434.999	2.391	pos
824	278790	279770	324651	262584	288104	325632	297889	315705	302880	270191	263419		879.585	21.652	pos
825	232536	225044	217786	234307	202078	192126	178655	168411	147107		174568		385.374	21.873	pos
826				143897		169069	321326	164225	179753				650.329	13.906	pos
827	283290		185509	194972	227441	199074	349287	426804					342.324	12.85	pos
828	187152	161201	197043	190978	172027	212694	189298	189458	198182	196079	234054		408.276	12.675	pos
829	207628	203662	223409	220213	219293	240748	206951	196699	193347	147213			413.423	14.006	pos
830	186643	221805	215449	219405	225440	227894	201817	183234	166370	164458			348.113	13.609	pos
831				260849	168163	134322	151195			134640			571.432	13.82	pos
832	157225	168489	153728		222284		216434	186426					212.178	12.991	pos
833	193116	203969	197235	196036	175924	186909	158000	176839	166217	132215			239.225	13.961	pos
834	187289	155700	165492	205560	191742	165926	172192	203058	188837				296.233	14.681	pos
835	99578	99870	84260	117166	247231	72554	109257						152.015	9.231	pos
836							323251	138796	322879				701.496	14.072	pos
837	184399	196889	194866	188696		123925	141248	132061	137692	100214			242.129	13.56	pos
838	173920	131525	93780	141097	152050	106078	170826	110018	132366	112126			525.387	14.151	pos
839	158249	133360		138805	131867	122753	154672	125241	131130	141406	147803		370.094	14.947	pos
840							188304	190391		162252			448.28	13.858	pos
841	109386	135722	119963	125318	107313	146031	155940	108362					271.251	21.869	pos
842		106285	118349				167045	159483	109504	123488	111475		187.063	5.687	pos
843		144976			153944		141902	155024	155155				571.443	13.313	pos
844	112641	123198	102006		130178	96128	89620	99899	130009	136137	101630		297.209	11.097	pos
845	104781	108071	107977	111655	111131	116056	105194	95313					184.158	21.564	pos
846	102366	96616	103756	93332	96398	86137	90534	90491	83490				269.272	14.225	pos
847	91644	85398	90635	90425	92883	99322	95885	86233					701.857	21.693	pos
848	17002980	16486774	14961929	12763774	10555926								745.594	21.65	pos
849	10956671	11901787	12293067	9069030	8348988								745.596	13.89	pos
850	807409	667670	521594	455804				1230389	2355764				733.565	13.877	pos
851	1100588	852919	664725	511599		331992							827.568	21.665	pos
852	1308967	1315258	498341	654635	1038374								825.566	21.677	pos
853	279921	274541	312382	264708	247234	271060		431982					871.538	21.669	pos
854	882925	936405	762186	629413	381182	764497							523.364	22.831	pos
855	999023	927881	856286	904767	741685	775155							825.564	13.808	pos
856	931249	958303	875932	943462	751812	781813							729.567	13.981	pos
857	457499	438196		425255	395974	416662		706149			348814		739.458	21.626	pos
858	131306	56588	47387	68545					11039		44716		456.264	11.581	pos
859	289562	242202	253124	188580	181325	101509							811.537	21.791	pos
860	375425	269877	350654	272665	312693	271199			289685				371.356	13.624	pos
861	363570			224828	301998	337589							309.303	16.122	pos
862	255964	264475	252062	259421		256754							707.483	13.915	pos
863				125607	156157	73156					107244		451.352	14.997	pos
864	380857	311416	209888	178074		134868							796.524	21.596	pos
865	122074	149807		174495	118101	120861							894.568	21.596	pos
866	135174	106868		123832	126475								630.559	21.67	pos
867	152840	158416	132058	132331	113154	116891		165407			162829		867.549	21.602	pos
868	140803	166026	156409	166075				447180			554808		844.536	21.679	pos
869													717.56	21.634	pos
870													745.567	13.931	pos
871													695.581	13.947	pos
872	441719	334294	303632										827.567	13.732	pos
873													691.544	13.897	pos
874	1278818					1204402							370.322	12.669	pos
875										322321	602665		873.552	13.684	pos
876					200014			161480	196065	189607	188730		438.202	12.604	pos
877	122180	113466	119792					124212	112447				340.133	11.345	pos
878	115788				112479				116956	105730			239.132	9.195	pos
879	116353	109330	96316		147651	145342			102436	110179			243.184	10.713	pos
