# Supplementary material for: Pathogenic NLRP3 mutants form constitutively active inflammasomes resulting in immune-metabolic limitation of IL-1β production
Source: Nat Commun. 2024 Feb 6;15:1096. doi: 10.1038/s41467-024-44990-0 (PMC10847128; doi:10.1038/s41467-024-44990-0)
Supplement: Supplementary file 7 — Source data [file 41467_2024_44990_MOESM7_ESM.xlsx]

## Sheet: Fig 1A
		CAPS untreated			CAPS LPS			Helathy untreated			Heaalthy LPS
		2h	4h	6h	2h	4h	6h	2h	4h	6h	2h	4h	6h
	A439T	8.9963	9.7216		11.205	30.8288		0.95	1.21	0.540387	1.41	6.13	7.19248
	A439T	6.7947	12.223		16.8246	32.958		0.59	1.53	7.45777	1.89	3.81	13.1127
	A439T		16.3107	15.5185		24.0765	34.5898	1.59	1.8	9.3088	1.04	2.52	14.1746
	A439T		12.889	18.8741		25.003	33.6072	1.57	2.46	8.918	1.82	4.84	16.6509
	D303N	11.3	14.48	12.37	25.97	27.94	65.76	0.98	2.06	1.71	1.15	4.7	6.1
	R260W	9.2	8.43	9.3	33.685	39.2	53.44		2.48696	2.59		3.255	3.88
	T348M	9.7	11.34	9.105	35.03	29.55	58.33			1.66			7.05
										3.45			10.07
										2.2			9.5

## Sheet: Fig 1B
			Untreated		LPS
			2 h	4 h	2 h	4 h
	HD		106.499	206.279	273.661	268.025
			381.315	183.951	178.381	307.543
			145.073	90.0843	375.625	268.025
			161.702	117.484	106.499	200.69
			150.61	36.1201	117.484	122.988
	CAPS	T348M	101.019	352.887	189.526	318.862
		R260W	426.927	1447.76	524.31	1288.26
		D303N	90.0843	296.236	239.901	273.661
		A439T	1305.3	1043.85	899.302	1512.27
		A439T	1395.56	1031.21	936.848	1721.46
		A439T		1518.78		1590.47
		A439T		1603.53		1734.6

## Sheet: Fig 1C
			Untreated		LPS
			4 h	6 h	4 h	6 h
	HD		0.772	0.772	0.913	3.193
			0.913	1.057	1.497	3.672
			0.232	0.362	0.632	1.349
			0.232	1.057	0.632	1.349
			0.232	0.632	0.632	1.349
	CAPS	D303N	4.187	22.212	5.252	39.332
		T348M	1.505	23.212	3.138	28.554
		R260W	3.976	24.79	17.754	58.199

## Sheet: Fig 1D
			Untreated		LPS
			2 h	4 h	2 h	4 h
	HD		0	0.80593	0	17.7174
			0	1.41611	1.41611	10.0537
			0	1.00904	0	13.9852
			0	0	0	11.5011
			0	0	0	2.23263
	CAPS	T348M	0	2.64176	4.48776	38.1166
		R260W	0	0	3.05135	127.678
		D303N	0	0	1.00904	24.3657
		A439T	7.67497	33.7019	18.2623	303.986
		A439T	5.80028	18.3626	11.5273	511.326
		A439T		0.0910512		236.547
		A439T		0		699.817

## Sheet: Fig 1E
			Untreated		LPS
			2 h	4 h	2 h	4 h
	HD		7.475	10.292	111.696	477.317
			9.116	3.471	166.029	544.537
			59.538	24.658	65.002	301.712
			0.922	8.454	194.727	482.114
			9.954	1.674	22.287	247.624
	CAPS	T348M	7.637	10.972	84.1	287.085
		R260W	8.126	27.173	247.03	315.203
		D303N	4.057	21.991	52.37	138.789
		A439T	30.0984	32.3054	21.3309	122.583
		A439T	34.4455	23.5185	42.1654	319.759
		A439T		0.0910512		236.547
		A439T		0		699.817

## Sheet: Fig 1F
	NLRP3			IL1B			TNFA			IL18			LGALS3
	Control 4H	LPS 4h		Control 4H	LPS 4h		Control 4H	LPS 4h		Control 4H	LPS 4h		Control 4H	LPS 4h
	8.52354	9.90829		10.8973	14.1666		8.12829	10.8556		13.0006	12.59		9.02984	8.65282
	8.52085	10.7131		11.9186	13.9332		8.0573	11.2357		12.639	12.6347		8.53572	10.5442
	7.93436	10.1807		10.2387	14.4896		7.90441	11.1859		13.6697	12.59		8.38941	9.45145
	8.55567	9.91992		11.8375	14.3103		8.57498	11.2234		12.8817	12.7216		8.79009	10.4245
	8.81708	10.2835		13.7567	14.2333		9.17468	11.9533		12.5057	12.4846		9.6214	9.43459
	8.34918	9.03964		9.79011	13.9169		7.5846	9.7645		12.8568	13.2308		9.82509	9.13237
	8.49673	9.79889		9.95787	14.3849		7.53108	10.4259		12.8863	13.2668		9.75679	9.85948
	8.92261	10.441		9.97009	14.2095		7.766	10.9182		12.7497	12.823		9.81497	9.36725
	8.56301	11.1859		11.1545	14.1238		8.00773	10.9419		12.9098	12.7542		8.54431	9.86745
	8.15801	8.38101		12.5181	13.1906		7.91916	9.24347		13.0655	12.9004		9.54873	8.6628
	8.51206	8.15188		10.5948	12.9237		7.37599	8.64694		12.6801	12.823		9.27439	8.11733
	9.11536	10.6109		11.0444	13.9647		7.56395	10.9896		12.4211	12.0901		9.42546	9.65857
	8.15174	9.96676		9.68394	14.2412		7.64055	10.6685		12.9475	12.5942		9.12017	10.0182
	7.81051	10.134		10.4103	14.1591		7.35482	12.3002		13.3924	12.6477		9.29303	10.1068
	8.30761	8.95514		9.04136	13.9001		7.24075	9.52664		13.4275	12.1468		9.06377	8.86704
	8.37016	9.9623		10.3295	14.2412		7.47457	11.0361		12.6801	12.8668		8.18787	9.86344
	7.81976	10.044		10.0912	14.4057		7.62337	10.634		12.823	13.2931		8.68636	9.31452
	8.07904	9.8818		11.5723	14.2996		7.38669	11.1641		13.2826	13.0944		9.79196	8.75809
	8.37819	10.3548		9.6398	14.2333		7.30552	11.1497		12.6801	12.4045		8.67425	9.16969
	7.55103	9.67423		11.5573	14.2499		7.06985	10.1352		13.2769	13.0159		11.0162	9.86745
	8.51935	9.82111		10.5275	14.3214		7.55878	10.1352		13.48	13.7895		10.3894	9.93342
	8.38101	9.39032		9.61182	14.1741		7.57179	10.8253		13.2206	13.7283		9.89557	10.1188
	8.10914	8.48238		11.9605	13.0159		8.29178	9.40207		13.547	14.1162		9.93012	9.02984
	8.92516	10.0126		12.083	14.2672		8.90695	11.2671		12.3721	12.735		9.00972	9.56527
	8.61566	10.6701		10.9569	13.8876		7.94338	11.8649		12.7678	12.59		8.79988	9.45617
	9.01409	8.44697		10.8414	12.777		7.83329	8.78734		12.6708	13.48		8.76223	9.19212
	8.79472			11.0184			9.08185			12.8668			9.09198
	8.16865			10.5019			7.77202			13.5728			10.2135
	8.29997			11.2856			7.90758			13.3032			10.7455
	9.09198			11.6818			7.68169			12.9719			9.72038

## Sheet: Fig 1G
	NLRP3			IL1B			IL18
	Healthy	CAPS G569R		Healthy	CAPS G569R		Healthy	CAPS G569R
	5.22109	5.69332		6.34412	6.02941		7.62837	7.14199
	4.75238	7.48872		5.4404	5.6266		6.73589	7.62522
	6.63458	4.38411		7.60667	5.96097		7.25702	6.18017
	5.52435	5.72352		6.07066	6.73516		6.83724	7.51055
	3.86183	6.45926		6.36655	6.5215		7.26004	7.46688
		6.17591			6.48537			6.71084
		5.92441			6.59818			7.08425

## Sheet: Fig 2C
	NLRP3 wild type			NLRP3 p.D303N
	Untreated	250 ng/ml doxycyline		Untreated	1 μg/ml doxycyline	1 μg/ml doxycyline +MCC950
	0.351674	0.894407		1.13008	4.91242	1.4982
	0.494011	1.07487		0.47961	6.92498	1.49616
	0.248736	0.566721		0.369562	3.07711	1.37521

## Sheet: Fig 2D
		NLRP3 wild type			NLRP3 p.D303N
		Untreated	250 ng/ml doxycyline		Untreated	1 μg/ml doxycyline	1 μg/ml doxycyline +MCC950
		8.12	7.72		2.49	28.98	6.58662
		17.81	14.06		2.89	31.87	8.99
		8.19	8.79		3.18	43.16	7.68

## Sheet: Fig 2E
NLRP3 p.T348M						NLRP3 p.R260W						NLRP3 wild type					NLRP3 p.D303N
Untreated	250 ng/ml doxycycline	500 ng/ml doxycycline	1μg/ml doxycycline	1μg/ml doxycycline+MCC950		Untreated	250 ng/ml doxycycline	500 ng/ml doxycycline	1μg/ml doxycycline	1μg/ml doxycycline+MCC950		Untreated	250 ng/ml doxycycline	500 ng/ml doxycycline	1μg/ml doxycycline		Untreated	250 ng/ml doxycycline	500 ng/ml doxycycline	1μg/ml doxycycline	1μg/ml doxycycline+MCC950
21.4989	184.455	248.546	371.202			40.8104	431.963	567.704	679.178			10.3167	8.36239	9.66721	1.47121		21.6254	556.371	614.71	1171.96
9.97625	247.609	363.821	414.452			0	13.4926	434.814	588.93			0	2.57863	4.12656	1.89468		12.9263	318.548	330.57	455.547
0	124.722	99.6298	208.724			5.18279	71.778	165.184	179.46			0.255688	4.22098	3.84537	0.196162		9.29229	101.169	292.686	393.044
			335.561	106.293					291.487	82.7978										263.173	0
			592.295	276.057					826.739	46.8413										569.074	0
			631.735	109.143					551.439	25.16										607.293	0

[truncated: 69 more sheets: Fig 3A, Fig 3B, Fig 3C, Fig 3D, Fig 3E, Fig 3F, Fig 4A, Fig 4B, Fig 4C, Fig 4D, Fig 4E, Fig 4F, Fig 4G, Fig 5A, Fig 5B, Fig 5C, Fig 5D, Fig 5E, Fig 5F, Fig 6A …]
